# Supplementary material for: Discovery of Candidate DNA Methylation Cancer Driver Genes
Source: Oxford University Press journal article supplement (doi:10.1158/2159-8290.cd-20-1334), 2021-05-10
Supplement: 21598290cd201334-sup-251511_2_supp_7043736_qrb653.xls [file 21598290cd201334-sup-251511_2_supp_7043736_qrb653.xls]

## Sheet: Description
Supplementary Table S1. Sequencing metrics of reduced representation bisulfite sequencing data.
SampleID	sample ID
TotalReads	number of total reads
TrimmedReads	number of trimmed reads
MappedReads	number of mapped reads
MappingEfficiency	mapping efficiency
CHGMehytlation	CHG methylation level
CHHMethylation	CHH methylation level
CpGs10X	number of CpGs covered by at least 10 reads

## Sheet: S1a. CLL8
SampleID	TotalReads	TrimmedReads	MappedReads	MappingEfficiency	CHGMehytlation	CHHMethylation	CpGs10X
G70100_GCLL-0066-T-01	24199961	23975508	12810530	0.534	0.002	0.001	1198215
G70101_GCLL-0065-T-01	16917330	16711097	8844145	0.529	0.002	0.001	780409
G70102_GCLL-0130-T-01	30469213	29365680	15881925	0.541	0.003	0.002	1573178
G70103_GCLL-0287-T-01	10251666	9996457	5531585	0.553	0.002	0.001	271206
G70104_GCLL-0090-T-01	19098379	18574169	10061908	0.542	0.002	0.001	922356
G70105_GCLL-0064-T-01	33321457	32875635	18255621	0.555	0.005	0.004	1407947
G70106_GCLL-0076-T-01	19662811	19150064	10575498	0.552	0.002	0.001	942137
G70107_GCLL-0286-T-01	19072421	18746709	10241675	0.546	0.002	0.001	935138
G70108_GCLL-0208-T-01	27328476	27132553	15044798	0.554	0.002	0.001	1116739
G70109_GCLL-0062-T-01	32310867	31778464	16894871	0.532	0.005	0.004	1541041
G70110_GCLL-0206-T-01	28165025	27806336	15095442	0.543	0.002	0.001	1397993
G70111_GCLL-0061-T-01	30867677	30398118	16317261	0.537	0.002	0.001	1559139
G70112_GCLL-0205-T-01	18001157	17746059	9636469	0.543	0.002	0.001	843030
G70113_GCLL-0145-T-01	20768144	20544560	10903950	0.531	0.003	0.001	1008262
G70114_GCLL-0204-T-01	23996001	23669263	12848812	0.543	0.002	0.001	1225397
G70115_GCLL-0285-T-01	32410716	31841799	17655797	0.554	0.002	0.001	1515758
G70116_GCLL-0129-T-01	36939131	36200911	19593528	0.541	0.002	0.001	1694641
G70117_GCLL-0202-T-01	35826828	35451019	19452026	0.549	0.002	0.001	1220340
G70118_GCLL-0175-T-01	17758847	17256216	9260693	0.537	0.004	0.003	889963
G70119_GCLL-0060-T-01	69361235	67701573	37534945	0.554	0.004	0.004	1665703
G70120_GCLL-0053-T-01	31247537	30828961	16697216	0.542	0.003	0.001	1398230
G70121_GCLL-0200-T-01	24520692	24061190	13145174	0.546	0.002	0.001	1347683
G70122_GCLL-0059-T-01	32852087	32251598	17195539	0.533	0.005	0.004	1589259
G70123_GCLL-0123-T-01	26006566	25604019	13434107	0.525	0.003	0.001	1185497
G70124_GCLL-0124-T-01	33347985	32443672	17457436	0.538	0.008	0.007	1506927
G70125_GCLL-0283-T-01	36956710	36548140	19980522	0.547	0.003	0.001	1366759
G70126_GCLL-0169-T-01	25318316	24672413	13360566	0.542	0.004	0.003	1288910
G70127_GCLL-0033-T-01	19284905	18942894	10101547	0.533	0.002	0.001	917818
G70128_GCLL-0058-T-01	33615811	33034646	17714282	0.536	0.002	0.001	1583437
G70129_GCLL-0199-T-01	13351747	13004750	7232919	0.556	0.002	0.001	522437
G70130_GCLL-0057-T-01	32581372	31846268	17355697	0.545	0.005	0.004	1359143
G70131_GCLL-0191-T-01	28002718	27309355	14642502	0.536	0.004	0.003	1382160
G70132_GCLL-0086-T-01	25903567	25627224	13422796	0.524	0.003	0.001	1259457
G70133_GCLL-0282-T-01	19922508	19605523	10518152	0.536	0.003	0.001	987825
G70134_GCLL-0280-T-01	26799927	26362663	14135504	0.536	0.002	0.001	1318060
G70135_GCLL-0126-T-01	25292188	24608321	13373319	0.543	0.004	0.003	1272690
G70136_GCLL-0120-T-01	25387296	24937549	13339858	0.535	0.002	0.001	1186049
G70137_GCLL-0055-T-01	20771532	20333187	11056342	0.544	0.002	0.001	1151871
G70138_GCLL-0279-T-01	30217369	29860818	16072272	0.538	0.002	0.001	1418411
G70139_GCLL-0219-T-01	28695351	28318471	15273338	0.539	0.003	0.001	1355294
G70140_GCLL-0217-T-01	32108300	31665421	17204344	0.543	0.003	0.001	1402019
G70141_GCLL-0119-T-01	27365817	26854038	14285493	0.532	0.002	0.001	1449448
G70142_GCLL-0115-T-01	28358645	27686026	14863048	0.537	0.003	0.002	1486565
G70143_GCLL-0051-T-01	25123961	24390148	13067021	0.536	0.004	0.003	1262595
G70144_GCLL-0233-T-01	24708016	24438957	13078777	0.535	0.002	0.001	1231241
G70145_GCLL-0203-T-01	19783140	19511591	10839951	0.556	0.002	0.001	793480
G70146_GCLL-0170-T-01	65936217	64548101	36565155	0.566	0.003	0.003	1984306
G70147_GCLL-0116-T-01	25300671	24464725	13207802	0.54	0.003	0.002	1371193
G70148_GCLL-0278-T-01	31582286	30810148	16834271	0.546	0.012	0.012	1510545
G70149_GCLL-0049-T-01	18465912	18286882	9664108	0.528	0.003	0.001	927157
G70150_GCLL-0277-T-01	27980597	27658546	14919764	0.539	0.002	0.001	1359927
G70151_GCLL-0276-T-01	32891497	32025259	17418508	0.544	0.005	0.004	1476926
G70152_GCLL-0159-T-01	24072828	23243595	12669921	0.545	0.003	0.002	1266121
G70153_GCLL-0114-T-01	21605892	21438173	11474294	0.535	0.002	0.001	1059479
G70154_GCLL-0245-T-01	21228754	20842790	11509316	0.552	0.002	0.001	1104407
G70155_GCLL-0122-T-01	25701253	25175075	13665601	0.543	0.002	0.001	1237374
G70156_GCLL-0005-T-01	43203827	42603465	22892820	0.537	0.002	0.001	1494329
G70157_GCLL-0021-T-01	29800598	29277080	15786568	0.539	0.002	0.001	1513790
G70158_GCLL-0088-T-01	27752629	27465319	14623032	0.532	0.002	0.001	1233517
G70159_GCLL-0275-T-01	17483964	17262781	9312649	0.539	0.002	0.001	870459
G70160_GCLL-0188-T-01	26298048	25463154	13637903	0.536	0.004	0.003	1308159
G70161_GCLL-0113-T-01	18746695	18219840	9985390	0.548	0.002	0.001	894155
G70162_GCLL-0110-T-01	56907040	55871614	30257547	0.542	0.002	0.001	1953496
G70163_GCLL-0137-T-01	23865439	23073126	12573025	0.545	0.003	0.002	1321376
G70164_GCLL-0187-T-01	43908789	43209453	23442996	0.543	0.002	0.001	1806319
G70165_GCLL-0047-T-01	23538032	22872357	12260261	0.536	0.002	0.001	1268417
G70166_GCLL-0184-T-01	32267126	31706482	16933580	0.534	0.002	0.001	1560224
G70167_GCLL-0094-T-01	26694036	26448079	14227849	0.538	0.002	0.001	1202156
G70168_GCLL-0108-T-01	31672907	30572129	16458179	0.538	0.005	0.004	1482720
G70169_GCLL-0017-T-01	30901672	30046033	15974030	0.532	0.003	0.002	1506074
G70170_GCLL-0045-T-01	17134526	16741408	9030520	0.539	0.002	0.001	806863
G70171_GCLL-0207-T-01	28694731	28361799	15351274	0.541	0.002	0.001	1331004
G70172_GCLL-0148-T-01	27582346	27132440	14758535	0.544	0.002	0.001	1359271
G70173_GCLL-0128-T-01	33240516	32636124	17441744	0.534	0.002	0.001	1594806
G70174_GCLL-0041-T-01	26299378	25875321	13829323	0.534	0.002	0.001	1311672
G70175_GCLL-0274-T-01	35510308	35086907	19305670	0.55	0.003	0.001	1386901
G70176_GCLL-0101-T-01	26808778	25772363	13987924	0.543	0.003	0.002	1433057
G70177_GCLL-0249-T-01	28364254	27952512	15043252	0.538	0.002	0.001	1372549
G70178_GCLL-0271-T-01	29429727	28906618	16114892	0.557	0.002	0.001	1234325
G70179_GCLL-0270-T-01	27531079	27085737	14656358	0.541	0.002	0.001	1331814
G70180_GCLL-0181-T-01	28667491	28192587	15093706	0.535	0.002	0.001	1450367
G70181_GCLL-0154-T-01	27708008	26770881	14462806	0.54	0.003	0.002	1433726
G70182_GCLL-0183-T-01	50432730	49146826	28095651	0.572	0.005	0.004	1709278
G70183_GCLL-0182-T-01	29910711	28900766	15585492	0.539	0.004	0.003	1420014
G70184_GCLL-0040-T-01	32032361	31136228	16288593	0.523	0.008	0.007	1437098
G70185_GCLL-0288-T-01	31351414	30996874	16916505	0.546	0.002	0.001	1380319
G70186_GCLL-0038-T-01	12473739	12213767	6712168	0.55	0.002	0.001	462462
G70187_GCLL-0194-T-01	20014555	19622059	10665955	0.544	0.002	0.001	1072316
G70188_GCLL-0227-T-01	34955921	34160703	18974840	0.555	0.012	0.011	1498163
G70189_GCLL-0105-T-01	20495322	19910146	10678644	0.536	0.005	0.004	1045831
G70190_GCLL-0104-T-01	16355715	15833241	8620488	0.544	0.003	0.002	858953
G70191_GCLL-0273-T-01	37259557	36804716	19964732	0.542	0.002	0.001	1551599
G70192_GCLL-0016-T-01	19754595	19589021	10395520	0.531	0.002	0.001	915563
G70193_GCLL-0008-T-01	31442930	31142137	16177327	0.519	0.002	0.001	1254579
G70194_GCLL-0180-T-01	25264372	24634313	13271881	0.539	0.002	0.001	1337512
G70195_GCLL-0179-T-01	11374920	11101439	5961126	0.537	0.005	0.003	444172
G70196_GCLL-0133-T-01	29602865	29072793	15786611	0.543	0.002	0.001	1509608
G70197_GCLL-0263-T-01	19231159	18953636	10320120	0.544	0.002	0.001	871077
G70198_GCLL-0269-T-01	33291670	32797083	18330289	0.559	0.002	0.001	1215033
G70199_GCLL-0156-T-01	19143992	18758421	10070444	0.537	0.003	0.002	980554
G70200_GCLL-0196-T-01	22877904	22621143	12232843	0.541	0.002	0.001	1062303
G70201_GCLL-0103-T-01	40980948	40254276	21931723	0.545	0.003	0.002	1728309
G70202_GCLL-0069-T-01	24143770	23390922	12495722	0.534	0.002	0.001	1183433
G70203_GCLL-0178-T-01	15463213	15026434	8071772	0.537	0.003	0.002	751782
G70204_GCLL-0176-T-01	164765458	164428323	102589444	0.624	0.001	0.001	199440
G70205_GCLL-0037-T-01	25639989	25315018	13291042	0.525	0.003	0.001	1230762
G70206_GCLL-0254-T-01	27753850	27267389	14949620	0.548	0.002	0.001	1366718
G70207_GCLL-0174-T-01	17176786	16867547	9068601	0.538	0.002	0.001	895748
G70208_GCLL-0035-T-01	26328824	26034960	13586870	0.522	0.002	0.001	1229808
G70209_GCLL-0032-T-01	34573658	33868526	17980822	0.531	0.002	0.001	1588783
G70210_GCLL-0030-T-01	22723581	22381646	12045206	0.538	0.005	0.004	1181852
G70211_GCLL-0071-T-01	22555144	22309576	11997864	0.538	0.002	0.001	1057331
G70212_GCLL-0084-T-01	20224664	19879075	10687433	0.538	0.002	0.001	962080
G70213_GCLL-0267-T-01	50016605	49623099	28217286	0.569	0.002	0.001	1427183
G70214_GCLL-0265-T-01	28066406	27640633	14830677	0.537	0.003	0.001	1333724
G70215_GCLL-0172-T-01	27733134	27104966	14530425	0.536	0.002	0.001	1458559
G70216_GCLL-0029-T-01	24032683	23399322	12738349	0.544	0.008	0.007	1145938
G70217_GCLL-0168-T-01	32985171	32506692	17704285	0.545	0.002	0.001	1615328
G70218_GCLL-0102-T-01	29380978	29130843	14637757	0.502	0.002	0.001	1256158
G70219_GCLL-0201-T-01	18342271	17993452	9769542	0.543	0.002	0.001	980729
G70220_GCLL-0264-T-01	22059755	21259669	11676857	0.549	0.012	0.012	1210843
G70221_GCLL-0044-T-01	30505393	29886532	16187179	0.542	0.002	0.001	1542160
G70222_GCLL-0100-T-01	32504151	31808693	17196674	0.541	0.002	0.001	1576215
G70223_GCLL-0132-T-01	29496959	28977636	15090496	0.521	0.002	0.001	1487177
G70224_GCLL-0099-T-01	30162455	29662668	16742383	0.564	0.004	0.003	1136423
G70225_GCLL-0091-T-01	16449396	16149900	8823238	0.546	0.002	0.001	913340
G70226_GCLL-0152-T-01	30810624	29927732	16297377	0.545	0.003	0.002	1554693
G70227_GCLL-0109-T-01	32634945	32043807	17400434	0.543	0.002	0.001	1604947
G70228_GCLL-0262-T-01	30248877	29809138	15947863	0.535	0.002	0.001	1411944
G70229_GCLL-0096-T-01	37534912	36722255	19486692	0.531	0.002	0.001	1514785
G70230_GCLL-0027-T-01	31650275	30909919	16545871	0.535	0.003	0.002	1563495
G70231_GCLL-0106-T-01	29575097	28862504	15647142	0.542	0.003	0.002	1530980
G70232_GCLL-0167-T-01	34758527	34055219	18365948	0.539	0.002	0.001	1679135
G70233_GCLL-0026-T-01	22014315	21282533	10764402	0.506	0.013	0.012	1086442
G70234_GCLL-0140-T-01	33281541	32768639	17878122	0.546	0.002	0.001	1627313
G70235_GCLL-0063-T-01	26568400	26168443	14130221	0.54	0.002	0.001	1289724
G70236_GCLL-0095-T-01	27054286	26751648	14324913	0.535	0.002	0.001	1212979
G70237_GCLL-0260-T-01	26648688	26226959	14427943	0.55	0.002	0.001	1124281
G70238_GCLL-0268-T-01	40449910	39805940	21888297	0.55	0.002	0.001	1608834
G70239_GCLL-0259-T-01	43040159	42808801	22420228	0.524	0.002	0.001	1455620
G70240_GCLL-0093-T-01	61187737	60269072	30452560	0.505	0.002	0.001	1892500
G70241_GCLL-0243-T-01	28208651	27674618	15106012	0.546	0.002	0.001	1361382
G70242_GCLL-0121-T-01	16330709	15885197	8656613	0.545	0.002	0.001	824412
G70243_GCLL-0258-T-01	4186481	4112485	2280914	0.555	0.002	0.001	16746
G70244_GCLL-0165-T-01	32003715	31393415	16696578	0.532	0.002	0.001	1609261
G70245_GCLL-0232-T-01	22207982	21902781	11991552	0.547	0.002	0.001	1130792
G70246_GCLL-0092-T-01	29036877	28777006	15515270	0.539	0.002	0.001	1266590
G70247_GCLL-0067-T-01	33320403	32716926	17823211	0.545	0.002	0.001	1620011
G70248_GCLL-0089-T-01	28085828	27791289	14909437	0.536	0.002	0.001	1249374
G70249_GCLL-0252-T-01	22644169	22125200	12179136	0.55	0.002	0.001	1215497
G70250_GCLL-0080-T-01	22162896	21685677	11682452	0.539	0.003	0.002	1172823
G70251_GCLL-0079-T-01	30702581	29931594	16293032	0.544	0.003	0.002	1558917
G70252_GCLL-0251-T-01	27437192	26692009	14594905	0.547	0.012	0.012	1401546
G70253_GCLL-0087-T-01	30198302	28651931	15405098	0.538	0.005	0.004	1393080
G70254_GCLL-0025-T-01	31402119	30826174	16617806	0.539	0.002	0.001	1606647
G70255_GCLL-0177-T-01	39520973	38674786	20820712	0.538	0.002	0.001	1733625
G70256_GCLL-0078-T-01	28914937	28376593	15322290	0.54	0.002	0.001	1431324
G70257_GCLL-0085-T-01	48972434	48348127	20142868	0.417	0.002	0.001	1561306
G70258_GCLL-0024-T-01	18912948	18646971	9984157	0.535	0.003	0.001	970967
G70259_GCLL-0020-T-01	16757327	16143614	8933856	0.553	0.002	0.001	650894
G70260_GCLL-0018-T-01	29714995	29021885	15352479	0.529	0.002	0.001	1361336
G70261_GCLL-0014-T-01	27989289	27458330	14387373	0.524	0.002	0.001	1421329
G70262_GCLL-0118-T-01	23139945	22709928	12371589	0.545	0.003	0.002	1270594
G70263_GCLL-0190-T-01	47068653	46138804	25021519	0.542	0.002	0.001	1857764
G70264_GCLL-0250-T-01	17396313	17166681	9266352	0.54	0.003	0.001	884247
G70265_GCLL-0244-T-01	32550332	32220120	17782901	0.552	0.002	0.001	1317811
G70266_GCLL-0022-T-01	29523879	29335848	15231151	0.519	0.002	0.001	1275967
G70267_GCLL-0242-T-01	48862161	48343578	27280471	0.564	0.002	0.001	1556065
G70268_GCLL-0013-T-01	30904467	29979270	16181306	0.54	0.003	0.002	1563328
G70269_GCLL-0117-T-01	6775958	6250026	3350611	0.536	0.002	0.001	59404
G70270_GCLL-0083-T-01	16385566	16076601	8675760	0.54	0.002	0.001	673840
G70271_GCLL-0241-T-01	16871303	16532070	8992674	0.544	0.002	0.001	812249
G70272_GCLL-0192-T-01	28710667	28217825	15240024	0.54	0.002	0.001	1447170
G70273_GCLL-0011-T-01	24436058	23753734	12945397	0.545	0.012	0.012	1291893
G70274_GCLL-0023-T-01	36811927	36558717	19575500	0.535	0.002	0.001	1462575
G70275_GCLL-0019-T-01	31942404	31697432	17333478	0.547	0.002	0.001	1350616
G70276_GCLL-0010-T-01	29427076	28915121	15506813	0.536	0.002	0.001	1434161
G70277_GCLL-0028-T-01	29446789	28942573	15166998	0.524	0.003	0.002	1476429
G70278_GCLL-0009-T-01	25029956	24872568	12085777	0.486	0.002	0.001	1090320
G70279_GCLL-0239-T-01	35422005	34812035	18990732	0.546	0.002	0.001	1474097
G70280_GCLL-0050-T-01	19806007	19450679	10435196	0.536	0.005	0.004	968199
G70281_GCLL-0164-T-01	31387344	30785078	16766897	0.545	0.003	0.002	1586285
G70282_GCLL-0163-T-01	22043263	21396101	11177522	0.522	0.008	0.007	1072659
G70283_GCLL-0006-T-01	26602695	25583849	13946109	0.545	0.012	0.012	1384145
G70284_GCLL-0161-T-01	70016160	69256811	41198255	0.595	0.004	0.003	2063454
G70285_GCLL-0235-T-01	23481812	23185257	12708460	0.548	0.002	0.001	1230012
G70286_GCLL-0075-T-01	81517868	80752269	42050408	0.521	0.002	0.001	1845813
G70287_GCLL-0036-T-01	34118548	33561985	17926097	0.534	0.005	0.003	1618245
G70288_GCLL-0257-T-01	70890931	69992499	44062470	0.63	0.001	0	1931060
G70289_GCLL-0143-T-01	19342708	18839614	10200631	0.541	0.004	0.003	978031
G70290_GCLL-0052-T-01	20931688	20388736	11079262	0.543	0.002	0.001	1131141
G70291_GCLL-0240-T-01	23542780	22877312	12520850	0.547	0.012	0.012	1241285
G70292_GCLL-0073-T-01	32403358	31596038	16779125	0.531	0.002	0.001	1610737
G70293_GCLL-0125-T-01	48429541	47810027	27417690	0.573	0.004	0.004	1584762
G70294_GCLL-0234-T-01	32041155	31481065	17164019	0.545	0.002	0.001	1429562
G70295_GCLL-0043-T-01	30063360	29132061	15373196	0.528	0.005	0.003	1409351
G70296_GCLL-0004-T-01	27771446	27073800	14624444	0.54	0.002	0.001	1454676
G70297_GCLL-0160-T-01	55412835	53852808	29275370	0.544	0.002	0.001	1900795
G70298_GCLL-0229-T-01	17755726	17394135	9748264	0.56	0.002	0.001	973844
G70299_GCLL-0127-T-01	27661540	27248033	14765296	0.542	0.005	0.003	1364657
G70300_GCLL-0256-T-01	40006469	38764349	21573037	0.557	0.004	0.004	1451982
G70301_GCLL-0002-T-01	37244395	37011549	19799015	0.535	0.002	0.001	1484135
G70302_GCLL-0157-T-01	20241539	19555169	10670645	0.546	0.005	0.004	917137
G70303_GCLL-0151-T-01	26817608	26044609	14110661	0.542	0.005	0.003	1313711
G70304_GCLL-0150-T-01	35209698	34520104	18573654	0.538	0.003	0.002	1664026
G70305_GCLL-0238-T-01	27039986	26613764	14519667	0.546	0.002	0.001	1323255
G70306_GCLL-0097-T-01	35179556	34224606	17643872	0.516	0.005	0.003	1528727
G70307_GCLL-0111-T-01	22371615	21609172	11705855	0.542	0.004	0.003	1157966
G70308_GCLL-0185-T-01	34267379	33274645	17743929	0.533	0.005	0.003	1542995
G70309_GCLL-0012-T-01	28132508	27509603	15047282	0.547	0.002	0.001	1345359
G70310_GCLL-0007-T-01	27998451	26822979	14480089	0.54	0.005	0.004	1363667
G70311_GCLL-0082-T-01	19951533	19768859	10164067	0.514	0.002	0.001	864706
G70312_GCLL-0225-T-01	29093447	28421954	15571303	0.548	0.002	0.001	1370993
G70313_GCLL-0015-T-01	25641353	23971382	12702142	0.53	0.005	0.004	1189562
G70314_GCLL-0001-T-01	28056417	27696337	14749589	0.533	0.003	0.001	1344436
G70315_GCLL-0081-T-01	18175529	17813764	9586787	0.538	0.002	0.001	888965
G70316_GCLL-0054-T-01	27580655	26557053	14377975	0.541	0.005	0.004	1333238
G70317_GCLL-0048-T-01	17634925	16785972	9064886	0.54	0.005	0.004	861974
G70318_GCLL-0149-T-01	21736768	21047187	11125626	0.529	0.002	0.001	1107761
G70319_GCLL-0224-T-01	31528664	31193723	17316199	0.555	0.002	0.001	1326855
G70320_GCLL-0201-T-01	24423784	23709574	12925590	0.545	0.002	0.001	1342799
G70321_GCLL-0147-T-01	35208766	34630323	18619376	0.538	0.002	0.001	1623353
G70322_GCLL-0272-T-01	28613834	27820591	15184038	0.546	0.005	0.004	1397505
G70323_GCLL-0237-T-01	26966922	26655213	14418689	0.541	0.003	0.001	1266001
G70324_GCLL-0146-T-01	36581607	35974464	19418500	0.54	0.002	0.001	1704654
G70325_GCLL-0056-T-01	22088422	21592316	11823754	0.548	0.007	0.007	986904
G70326_GCLL-0144-T-01	28038394	27147040	14771652	0.544	0.004	0.003	1378390
G70327_GCLL-0266-T-01	50448643	49578804	26763877	0.54	0.002	0	1702137
G70328_GCLL-0236-T-01	28681253	28330176	15319386	0.541	0.002	0.001	1383867
G70329_GCLL-0231-T-01	30896264	30391157	16742786	0.551	0.002	0.001	1329411
G70330_GCLL-0173-T-01	49886533	49037778	25962212	0.529	0.002	0	1693879
G70331_GCLL-0046-T-01	30423030	29702411	16380638	0.551	0.005	0.004	1313923
G70332_GCLL-0039-T-01	24153802	23420292	12699878	0.542	0.005	0.004	1203287
G70333_GCLL-0077-T-01	33310337	33099877	18048112	0.545	0.002	0.001	1417453
G70334_GCLL-0098-T-01	19042364	18524006	9939886	0.537	0.009	0.008	878764
G70335_GCLL-0034-T-01	24988129	24143029	12854135	0.532	0.012	0.012	1286134
G70336_GCLL-0230-T-01	24661947	24442011	13238770	0.542	0.002	0.001	1169443
G70337_GCLL-0228-T-01	22454964	22216218	11960658	0.538	0.003	0.001	1149298
G70338_GCLL-0042-T-01	28202058	27347776	14604196	0.534	0.008	0.007	1347967
G70339_GCLL-0158-T-01	24194702	23631932	12742342	0.539	0.002	0.001	1338265
G70340_GCLL-0214-T-01	55418637	54462747	29528952	0.542	0.002	0	1750239
G70341_GCLL-0142-T-01	29440339	28394048	15341460	0.54	0.003	0.002	1517061
G70342_GCLL-0253-T-01	20600362	20196519	10897615	0.54	0.002	0.001	1120941
G70343_GCLL-0153-T-01	41282152	40459701	23379470	0.578	0.008	0.008	1527934
G70344_GCLL-0139-T-01	31604875	31012412	16617723	0.536	0.002	0.001	1543326
G70345_GCLL-0074-T-01	25308944	24616127	13142238	0.534	0.005	0.003	1258176
G70346_GCLL-0255-T-01	28739340	28004070	15140457	0.541	0.002	0.001	1509748
G70347_GCLL-0226-T-01	24958786	24554134	13252768	0.54	0.002	0.001	1261837
G70348_GCLL-0141-T-01	23184822	22566618	12151297	0.538	0.008	0.007	1133582
G70349_GCLL-0281-T-01	72120191	71120437	39007698	0.548	0.002	0	1813821
G70350_GCLL-0072-T-01	15740988	15472348	8308983	0.537	0.005	0.004	703579
G70351_GCLL-0223-T-01	24436865	24049256	13036852	0.542	0.002	0.001	1241739
G70352_GCLL-0138-T-01	16790505	16417511	8742548	0.533	0.002	0.001	748208
G70353_GCLL-0031-T-01	29814930	29033522	15586860	0.537	0.003	0.001	1364763
G70354_GCLL-0221-T-01	29863515	29680059	16188568	0.545	0.002	0.001	1335077
G70355_GCLL-0112-T-01	42780616	41550639	22608461	0.544	0.008	0.007	1609534
G70356_GCLL-0210-T-01	26858831	26282956	14295154	0.544	0.003	0.001	1258336
G70357_GCLL-0171-T-01	35879884	34940553	18729666	0.536	0.008	0.007	1572203
G70358_GCLL-0070-T-01	24454515	23984932	12618273	0.526	0.005	0.004	1175819
G70359_GCLL-0220-T-01	22317097	22032239	12126287	0.55	0.003	0.001	869664
G70360_GCLL-0218-T-01	34949245	34523281	18579688	0.538	0.002	0	1487704
G70361_GCLL-0216-T-01	30460471	30092209	16600603	0.552	0.002	0.001	1282760
G70362_GCLL-0215-T-01	31744895	31335168	17048953	0.544	0.002	0.001	1340732
G70363_GCLL-0166-T-01	28722187	27990631	15053717	0.538	0.008	0.007	1364422
G70364_GCLL-0213-T-01	27383037	27026674	14629171	0.541	0.002	0.001	1357431
G70365_GCLL-0136-T-01	34055990	33507823	16847175	0.503	0.002	0.001	1584661
G70366_GCLL-0135-T-01	30838777	30178821	16404915	0.544	0.002	0.001	1576639
G70367_GCLL-0162-T-01	61719771	60351056	31527835	0.522	0.011	0.012	1782967
G70368_GCLL-0003-T-01	18400031	17886074	9619871	0.538	0.004	0.003	791439
G70369_GCLL-0211-T-01	32898837	32545077	17693181	0.544	0.002	0.001	1457916
G70370_GCLL-0212-T-01	25578744	25230807	13689443	0.543	0.002	0.001	1266485
G70371_GCLL-0155-T-01	23593787	22802268	12506437	0.548	0.012	0.012	1253058
G70372_GCLL-0222-T-01	17995466	17744912	9542471	0.538	0.002	0.001	902891
G70373_GCLL-0186-T-01	22324271	21715379	11523251	0.531	0.004	0.003	1097123
G70374_GCLL-0068-T-01	32656814	31916090	16958125	0.531	0.002	0.001	1539867
G70375_GCLL-0289-T-01	31849431	30955203	16673688	0.539	0.002	0.001	1608931
G70376_GCLL-0189-T-01	33168754	31748570	17125627	0.539	0.004	0.003	1540668
G70377_GCLL-0107-T-01	28034185	27737264	15209073	0.548	0.002	0.001	1350759
G70378_GCLL-0131-T-01	28230523	27858045	15046027	0.54	0.005	0.004	1410078
G70379_GCLL-0261-T-01	31298003	30400715	16697127	0.549	0.012	0.012	1550008
G70380_GCLL-0246-T-01	33561944	32911430	17780606	0.54	0.002	0.001	1668674
G70381_GCLL-0209-T-01	27437805	27169510	14897035	0.548	0.002	0.001	1220716
G77967_GCLL-0201-T-01	11303993	11280782	6274878	0.556	0.005	0.003	281707
G77967_GCLL-0202-T-01	18462078	18415424	10284247	0.558	0.003	0.001	544115
G77967_GCLL-0203-T-01	10438412	10415587	5768108	0.554	0.005	0.003	236537
G77967_GCLL-0204-T-01	13455807	13427178	7534532	0.561	0.003	0.001	491866
G77967_GCLL-0205-T-01	11996935	11977702	6750964	0.564	0.003	0.001	305602
G77967_GCLL-0206-T-01	12757479	12733460	7118866	0.559	0.003	0.001	429180
G77967_GCLL-0207-T-01	14186337	14157401	7906288	0.558	0.003	0.001	521834
G77967_GCLL-0208-T-01	198572	96608	51867	0.537	0.004	0.002	292
G77967_GCLL-0209-T-01	15188626	15166384	8561306	0.564	0.003	0.001	463808
G77967_GCLL-0210-T-01	10669503	10650895	5920070	0.556	0.005	0.003	245249
G77967_GCLL-0211-T-01	12871041	12828228	7192609	0.561	0.003	0.001	412405
G77967_GCLL-0212-T-01	6429656	6401315	3532619	0.552	0.005	0.003	30792
G77967_GCLL-0213-T-01	11761341	11741552	6519554	0.555	0.005	0.003	341590
G77967_GCLL-0214-T-01	14710268	14681264	8220187	0.56	0.003	0.001	605945
G77967_GCLL-0215-T-01	15119506	15102993	8499857	0.563	0.003	0.001	561042
G77967_GCLL-0216-T-01	14573560	14551336	8270471	0.568	0.003	0.001	356198
G77967_GCLL-0217-T-01	11233191	11208124	6286902	0.561	0.003	0.001	261831
G77967_GCLL-0218-T-01	9303788	9288139	5135859	0.553	0.005	0.003	128837
G77967_GCLL-0219-T-01	12257326	12233612	6806742	0.556	0.003	0.001	360753
G77967_GCLL-0220-T-01	18448723	18404222	10406303	0.565	0.003	0.001	670623
G77967_GCLL-0221-T-01	12098665	12071028	6814940	0.565	0.003	0.001	380812
G77967_GCLL-0222-T-01	14162463	14121620	7871769	0.557	0.003	0.001	549159
G77967_GCLL-0223-T-01	35128340	35100836	20612367	0.587	0.002	0.001	752857
G77967_GCLL-0224-T-01	16078596	16047968	9152691	0.57	0.003	0.001	466972
G77967_GCLL-0225-T-01	11295384	11274122	6289074	0.558	0.003	0.001	302109
G77967_GCLL-0226-T-01	9731654	9716604	5359521	0.552	0.005	0.003	185362
G77967_GCLL-0228-T-01	13913175	13863436	7734014	0.558	0.003	0.001	513729
G77967_GCLL-0229-T-01	13287479	13200790	7524247	0.57	0.003	0.001	423295
G77967_GCLL-0230-T-01	13670412	13639586	7633085	0.56	0.003	0.001	451143
G77967_GCLL-0231-T-01	13351284	13328672	7451949	0.559	0.003	0.001	461869
G77967_GCLL-0232-T-01	12421813	12392400	6918038	0.558	0.003	0.001	340849
G77967_GCLL-0233-T-01	11958077	11935004	6588619	0.552	0.003	0.001	357273
G77967_GCLL-0234-T-01	9051842	9035051	4953186	0.548	0.005	0.003	142362
G77967_GCLL-0235-T-01	14343973	14313907	8072674	0.564	0.003	0.001	572840
G77967_GCLL-0236-T-01	13473806	13428546	7524846	0.56	0.003	0.001	493035
G77967_GCLL-0237-T-01	10978908	10932150	6068583	0.555	0.005	0.003	218057
G77967_GCLL-0238-T-01	12505217	12485684	7002016	0.561	0.003	0.001	383472
G77967_GCLL-0239-T-01	11792805	11725311	6591788	0.562	0.003	0.001	258424
G77967_GCLL-0241-T-01	67225887	67208874	7345425	0.109	0.004	0.003	105143
G77967_GCLL-0242-T-01	10734049	10709046	6069492	0.567	0.003	0.001	164496
G77967_GCLL-0243-T-01	11080625	11049505	6132130	0.555	0.003	0.001	294451
G77967_GCLL-0244-T-01	17698458	17669059	10077644	0.57	0.003	0.001	577904
G77967_GCLL-0245-T-01	14898661	14831114	8299945	0.56	0.003	0.001	599667
G77967_GCLL-0249-T-01	13000307	12906103	7231033	0.56	0.003	0.001	428966
G77967_GCLL-0250-T-01	14976818	14943578	8438321	0.565	0.003	0.001	625514
G77967_GCLL-0252-T-01	12263125	12241490	6892370	0.563	0.003	0.001	243946
G77967_GCLL-0253-T-01	14919801	14879381	8320245	0.559	0.003	0.001	622653
G77967_GCLL-0254-T-01	10297057	10224504	5781612	0.565	0.003	0.001	244886
G77967_GCLL-0255-T-01	14155112	14124401	7913078	0.56	0.003	0.001	548508
G77967_GCLL-0264-T-01	11424103	11403666	6310651	0.553	0.005	0.003	304105
G88552_GCLL-0314-T-01	12746196	12516486	6886234	0.55	0.002	0.001	246392
G90613_GCLL-0290-T-01	69392760	69245413	38181350	0.551	0.002	0.001	1960488
G90614_GCLL-0291-T-01	12732920	12672126	7000947	0.552	0.002	0.001	386848
G90615_GCLL-0293-T-01	4649231	4516006	2467491	0.546	0.002	0.001	11540
G90616_GCLL-0294-T-01	78815773	78575986	42453973	0.54	0.002	0.001	2078702
G90617_GCLL-0295-T-01	37947633	37788222	20906442	0.553	0.002	0	1813954
G90618_GCLL-0296-T-01	58333183	57968084	31103429	0.537	0.002	0.001	1678269
G90619_GCLL-0297-T-01	22220170	22154452	12262102	0.553	0.002	0.001	902586
G90620_GCLL-0298-T-01	23298944	23261536	12744368	0.548	0.002	0.001	766657
G90621_GCLL-0299-T-01	45854741	45587880	24216744	0.531	0.002	0.001	1696806
G90622_GCLL-0300-T-01	41230152	41136261	23275428	0.566	0.002	0.001	1818902
G90623_GCLL-0301-T-01	6257020	6139375	2877966	0.469	0.002	0.001	77199
G90624_GCLL-0302-T-01	65489485	65297655	36514312	0.559	0.002	0.001	2008210
G90625_GCLL-0303-T-01	18954391	18883864	10214742	0.541	0.002	0.001	883271
G90626_GCLL-0304-T-01	1897024	1231923	365496	0.297	0.006	0.004	1210
G90627_GCLL-0305-T-01	80109606	79916616	43713721	0.547	0.002	0.001	2178847
G90628_GCLL-0306-T-01	42053563	41950200	22867250	0.545	0.002	0.001	1666562
G90629_GCLL-0307-T-01	25538310	25412690	14327962	0.564	0.002	0	1310484
G90630_GCLL-0308-T-01	22509161	22350892	12064788	0.54	0.002	0.001	1011657
G90631_GCLL-0309-T-01	41356893	41262186	22718667	0.551	0.002	0.001	1550961
G90632_GCLL-0310-T-01	10078328	9889351	5255337	0.531	0.002	0.001	255620
G90633_GCLL-0311-T-01	48572531	48449442	27074593	0.559	0.002	0.001	1727646
G90634_GCLL-0313-T-01	38600700	38470483	22053199	0.573	0.002	0.001	1720380
G77967_GCLL-0042-T-02	12642261	12615910	7039435	0.558	0.003	0.001	416200
G77967_GCLL-0071-T-02	13695878	13668575	7699350	0.563	0.003	0.001	505175
G77967_GCLL-0089-T-02	10316211	10266199	5769500	0.562	0.003	0.001	233169
G77967_GCLL-0101-T-02	14466760	14434448	8103698	0.561	0.003	0.001	530820
G77967_GCLL-0142-T-02	15908860	15856746	8892483	0.561	0.003	0.001	701230
G77967_GCLL-0164-T-02	15526439	15491924	8659586	0.559	0.003	0.001	653448
G77967_GCLL-0176-T-02	13053050	13030738	7286305	0.559	0.003	0.001	438952
G77967_GCLL-0233-T-02	14407806	14375369	8044204	0.56	0.003	0.001	565906
G77967_GCLL-0236-T-02	12555354	12537047	7028681	0.561	0.003	0.001	294674
G77967_GCLL-0237-T-02	12081859	12052351	6725569	0.558	0.003	0.001	349312
G88506_GCLL-0123-T-02	19269063	19103314	10599933	0.555	0.002	0.001	898015
G88507_GCLL-0294-T-02	16415415	16210594	8128661	0.501	0.002	0.002	461732
G88508_GCLL-0204-T-02	1475921	177717	50726	0.285	0.005	0.003	373
G88510_GCLL-0298-T-02	18725122	18529741	10100875	0.545	0.002	0.001	861541
G88511_GCLL-0295-T-02	16863303	16734771	9264592	0.554	0.002	0.001	707731
G88512_GCLL-0027-T-02	15245445	14940350	8114072	0.543	0.003	0.001	567665
G88513_GCLL-0306-T-02	16951300	16814083	9339763	0.555	0.002	0.001	680387
G88515_GCLL-0084-T-02	10938999	10849748	5955914	0.549	0.002	0.001	231482
G88516_GCLL-0307-T-02	7583464	7384365	4046597	0.548	0.002	0.001	89130
G88518_GCLL-0277-T-02	13990186	13756056	7605968	0.553	0.002	0.001	533288
G88519_GCLL-0305-T-02	13191461	12979263	7104413	0.547	0.002	0.001	474565
G88520_GCLL-0148-T-02	27869527	27451327	13967183	0.509	0.002	0.001	1359995
G88521_GCLL-0293-T-02	15590943	15374771	8427810	0.548	0.002	0.001	653791
G88525_GCLL-0297-T-02	11399909	11287050	6242037	0.553	0.002	0.001	234791
G88526_GCLL-0150-T-02	13762371	13479469	7373468	0.547	0.002	0.001	470341
G88527_GCLL-0183-T-02	10943592	10741958	5848777	0.544	0.002	0.001	241635
G88528_GCLL-0218-T-02	16868697	16429204	8935315	0.544	0.002	0.001	754372
G88529_GCLL-0296-T-02	12230575	12087697	6600634	0.546	0.002	0.001	268722
G88530_GCLL-0184-T-02	19109609	18826235	9440443	0.501	0.003	0.002	670863
G88532_GCLL-0308-T-02	19248964	18764911	9305095	0.496	0.003	0.002	549547
G88534_GCLL-0290-T-02	10848638	10738335	5944703	0.554	0.002	0.001	215125
G88535_GCLL-0300-T-02	9487287	9373963	5194645	0.554	0.002	0.001	198403
G88540_GCLL-0057-T-02	15422676	15122275	8250999	0.546	0.002	0.001	556927
G88541_GCLL-0066-T-02	13024608	12861567	7051434	0.548	0.002	0.001	347647
G88542_GCLL-0016-T-02	20576749	20459075	11384472	0.556	0.002	0.001	1026890
G88543_GCLL-0190-T-02	13617302	13534277	7508167	0.555	0.002	0.001	455046
G88544_GCLL-0026-T-02	6048535	5915874	3285486	0.555	0.002	0.001	18840
G88545_GCLL-0153-T-02	7281406	7151284	3947463	0.552	0.002	0.001	51476
G88546_GCLL-0080-T-02	13021206	12924013	7189623	0.556	0.002	0.001	385135
G88547_GCLL-0167-T-02	9752643	9664001	5382411	0.557	0.002	0.001	137434
G88548_GCLL-0314-T-02	18283753	17988163	8979853	0.499	0.003	0.002	591044
G88554_GCLL-0082-T-02	13870200	13728191	7528164	0.548	0.002	0.001	444577
G88556_GCLL-0311-T-02	14034919	13906951	7691649	0.553	0.002	0.001	455678
G88557_GCLL-0309-T-02	13752002	13393750	7293913	0.545	0.003	0.001	433608
G88558_GCLL-0304-T-02	14799722	14634470	7907827	0.54	0.003	0.001	445105
G88559_GCLL-0015-T-02	4773811	4570526	2518505	0.551	0.002	0.001	5962
G88560_GCLL-0009-T-02	14491385	14296672	7779527	0.544	0.002	0.001	532169
G88561_GCLL-0252-T-02	21246118	20760464	11328679	0.546	0.002	0.001	1075955
G88563_GCLL-0132_UNKNOWN_T-02	11576041	11433293	6246064	0.546	0.002	0.001	264405
G88565_GCLL-0106-T-02	14138162	13852947	7552113	0.545	0.002	0.001	550587
G88566_GCLL-0259-T-02	21326502	21028301	10803969	0.514	0.002	0.001	903179
G88567_GCLL-0299-T-02	17479005	17212315	9368399	0.544	0.002	0.001	729392
G90635_GCLL-0045-T-02	8691487	8635478	4883383	0.566	0.002	0.001	176682
G90636_GCLL-0103-T-02	971282	671736	257843	0.384	0.034	0.018	1200
G90638_GCLL-0022-T-02	29666742	29543720	15931956	0.539	0.002	0.001	1261290
G90641_GCLL-0011-T-02	37548610	37424819	21181831	0.566	0.002	0.001	1852436
G90642_GCLL-0208-T-02	29039641	28467448	15423314	0.542	0.002	0.001	1378547
G90643_GCLL-0024-T-02	30593832	30468066	17173379	0.564	0.002	0.001	1613653
G90644_GCLL-0286-T-02	46055777	45825654	25659697	0.56	0.002	0.001	1938000
G90645_GCLL-0085-T-02	48130722	47993214	26797735	0.558	0.002	0.001	1762114
G90646_GCLL-0263-T-02	32275781	32194207	18137188	0.563	0.002	0	1239249
G90647_GCLL-0166-T-02	44582433	44095098	24481148	0.555	0.002	0.001	1879912
G90648_GCLL-0017-T-02	45446359	45337978	25105727	0.554	0.002	0.001	1743858
G90649_GCLL-0289-T-02	2257028	1236676	259812	0.21	0.035	0.021	1114
G90650_GCLL-0182-T-02	46525157	46231713	25838729	0.559	0.002	0.001	1905121
G90651_GCLL-0176-T-02	55312220	55052946	29632196	0.538	0.002	0.001	1889443
G90652_GCLL-0146-T-02	36364358	36190170	20283530	0.56	0.002	0	1761159
G90654_GCLL-0101-T-02	25400958	24954494	13671973	0.548	0.002	0.001	1426144
G90655_GCLL-0060-T-02	48948684	48809647	26838409	0.55	0.002	0.001	1845358
G90656_GCLL-0049-T-02	24208225	23694124	13062115	0.551	0.002	0.001	1325079
G90657_GCLL-0168-T-02	51035740	50491616	27282385	0.54	0.002	0.001	1741350
G90658_GCLL-0142-T-02	46484955	46401564	26374775	0.568	0.002	0.001	1947304
G90660_GCLL-0068-T-02	42304455	42113433	23662786	0.562	0.002	0	1875979
G90661_GCLL-0285-T-02	33787764	33440739	18379073	0.55	0.002	0.001	1490228
G90662_GCLL-0186-T-02	29399875	29226198	16432315	0.562	0.002	0.001	1583897
G90663_GCLL-0089-T-02	31759115	31650147	17827822	0.563	0.002	0.001	1551104
G90664_GCLL-0192-T-02	30282438	30176060	16785224	0.556	0.002	0.001	1575260
G90665_GCLL-0071-T-02	21525464	21361274	11816796	0.553	0.003	0.001	898264
G90666_GCLL-0233-T-02	22946216	22890772	12762938	0.558	0.002	0.001	953584
G90668_GCLL-0260-T-02	35612741	35482896	19276626	0.543	0.002	0.001	1414973
G90669_GCLL-0257-T-02	57338811	57130113	32213908	0.564	0.002	0.001	1952312
G90670_GCLL-0255-T-02	36974084	36788423	20822676	0.566	0.002	0.001	1754107
G90673_GCLL-0135-T-02	36825179	36725134	20754373	0.565	0.002	0.001	1792713
G90675_GCLL-0164-T-02	1606418	1031207	333988	0.324	0.025	0.019	1092
G90677_GCLL-0265-T-02	11908076	11573378	6129852	0.53	0.002	0.001	346923
G90678_GCLL-0237-T-02	31070292	31009570	17615500	0.568	0.002	0.001	1565262
G90680_GCLL-0157-T-02	50068831	49951645	27590715	0.552	0.002	0.001	1849000
G90681_GCLL-0048-T-02	24103856	24013557	14042051	0.585	0.002	0.001	1100627
G90682_GCLL-0236-T-02	56645465	56503898	31473761	0.557	0.002	0.001	1926185
G90684_GCLL-0287-T-02	57559947	57368191	32330448	0.564	0.002	0.001	2048138
G90686_GCLL-0125-T-02	27810775	27748032	15467890	0.557	0.002	0.001	1131955
G90687_GCLL-0199-T-02	814701	548369	209426	0.382	0.031	0.016	678
G90688_GCLL-0042-T-02	27699110	27626335	15046370	0.545	0.002	0	1205691
G90690_GCLL-0115-T-02	63893518	63638667	34506030	0.542	0.002	0.001	2033053
G90691_GCLL-0313-T-02	33857529	33736500	18331414	0.543	0.002	0.001	1366935
G90692_GCLL-0105-T-02	34927878	34845325	19480978	0.559	0.002	0.001	1506890

## Sheet: S1b. MM-CNRS
SampleID	TotalReads	TrimmedReads	MappedReads	MappingEfficiency	CHGMehytlation	CHHMethylation	CpGs10X
E11158	53567300	53563069	51702343	0.965	0.001	0.001	2739787
E11159	59061671	59056771	56906758	0.964	0.001	0.001	2847542
E11163	56975197	56970821	54737278	0.961	0.001	0.001	2697192
E11167	57129891	57128207	54993653	0.963	0.001	0.001	2697914
E11173	58644272	58642532	56532305	0.964	0.001	0.001	2636442
E11193	57157625	57152902	55045523	0.963	0.002	0.001	2733917
E11221	57945222	57940327	55606415	0.96	0.002	0.001	2802530
E11225	54441157	54436616	52516767	0.965	0.001	0.001	2783001
E11248	59213022	59208194	57100344	0.964	0.001	0.001	2738738
E12005	59326711	59321848	57178204	0.964	0.001	0.001	2808583
E12009	61741252	61736496	59240297	0.96	0.001	0.001	2783256
E12010	61200676	61195855	58702056	0.959	0.001	0.001	2819862
E12065	55206195	55201396	53117431	0.962	0.001	0.001	2691220
E12069	62630422	62625538	60310066	0.963	0.001	0.001	2805146
E12082	50233852	50229916	48362443	0.963	0.003	0.003	2379154
E12124	52963798	52959169	50930019	0.962	0.002	0.002	2517194
E12126	57897117	57892368	55588542	0.96	0.001	0.001	2761460
E12146	56387332	56382888	54030988	0.958	0.001	0.001	2753646
E12185	56607475	56602701	54525488	0.963	0.002	0.002	2609818
E13067	56498903	56494249	54414514	0.963	0.002	0.001	2769530
E13070	50742586	50738368	48682442	0.959	0.002	0.002	2556033
E13084	47773787	47772461	45964919	0.962	0.001	0.001	2365083
E13093	54787870	54783391	52549042	0.959	0.001	0.001	2745927
E13098	55500796	55496035	53577436	0.965	0.002	0.002	2667570
E13145	54097361	54092810	52027412	0.962	0.002	0.001	2790600
E13187	58047242	58042694	56025315	0.965	0.002	0.001	2758553
E13211	51048165	51046493	49304615	0.966	0.001	0.001	2546078
E13227	57472011	57470282	55431141	0.965	0.001	0.001	2643137
E14005	55952591	55948215	53644749	0.959	0.001	0.001	2635324
E14024	52901382	52897752	50681263	0.958	0.001	0.001	2780583
E14144	46638901	46635717	44680115	0.958	0.001	0.001	2556096
E14182	57398765	57395055	55090022	0.96	0.001	0.001	2787639
E14186	58730706	58726905	56508439	0.962	0.002	0.001	2700499
E15008	57543267	57539449	54996435	0.956	0.002	0.001	2714856
E15012	59311691	59307676	56960206	0.96	0.001	0.001	2811176
E15030	58514513	58510589	55819013	0.954	0.001	0.001	2761068
E15168	55631435	55629553	53684233	0.965	0.001	0.001	2587251
E6026	58487605	58483736	55673333	0.952	0.001	0.001	2715041
E6027	58884270	58880443	56335789	0.957	0.001	0.001	2818092
E6071	59701897	59697939	56921595	0.953	0.001	0.001	2775273
E6074	56786830	56783019	54108436	0.953	0.001	0.001	2732424
E6087	60823273	60819186	58042408	0.954	0.001	0.001	2775837
E6102	56962734	56959064	54417198	0.955	0.002	0.001	2763243
E6118	59377541	59373585	56854630	0.958	0.001	0.001	2775757
PC1	53043291	53041843	51071431	0.963	0.002	0.002	2579954
PC2	56053459	56051933	53888148	0.961	0.001	0.001	2643597
PC3	58826361	58824531	56673631	0.963	0.001	0.001	2600396
