# Supplementary material for: Discovery of Candidate DNA Methylation Cancer Driver Genes
Source: Oxford University Press journal article supplement (doi:10.1158/2159-8290.cd-20-1334), 2021-05-10
Supplement: 21598290cd201334-sup-251511_2_supp_7043741_qrb654.xls [file 21598290cd201334-sup-251511_2_supp_7043741_qrb654.xls]

## Sheet: Description
Supplementary Table S5. MethSig DNA methylation drivers enriched pathways (BH-FDR Q < 0.25).
pvalue	hypergeometric test p-values
nhyper	number of DNAme drivers
ntotal	number of total genes inferred by MethSig
genes	hugo gene symbols of involved DNAme drivers
padj	adjusted p-values
pathway	pathway names
P-values were adjusted by a Benjamini-Hochberg FDR procedure.

## Sheet: S5a. CLL T1
pvalue	nhyper	ntotal	genes	padj	pathway
4.77296e-09	12	81	HORMAD2, PCDHB7, PCDHA4, C1orf65, LTB4R, MTNR1A, RPH3A, ACRBP, PCDHB14, PCDHA1, PCDHA2, PCDHA5	1.29872e-05	MIKKELSEN_MEF_HCP_WITH_H3_UNMETHYLATED
2.12909e-05	20	387	C20orf85, EMX2, ASPG, TMEM61, FAM50B, FOXD1, C9orf142, PCDHA1, TACSTD2, ZNF835, TEKT4, OTOS, NHLRC1, DRD5, HTR1A, CD164L2, GPR6, C1orf65, GDF15, PIK3R5	0.0289663	MARTENS_TRETINOIN_RESPONSE_UP
5.45991e-05	4	22	PCDHB15, PCDHB14, PCDHA2, PCDHB7	0.0368589	MIKKELSEN_ES_HCP_WITH_H3K27ME3
6.21168e-05	3	12	CXCL2, TACSTD2, HIST1H2AI	0.0368589	DAZARD_UV_RESPONSE_CLUSTER_G28
6.77305e-05	14	239	ANK3, LAMA2, GDAP1L1, CNKSR1, CXCL2, ZNF454, CYYR1, ZFP42, MLPH, CPT1B, PUS3, GDF15, NPFFR2, SPHKAP	0.0368589	MIKKELSEN_ES_ICP_WITH_H3K4ME3
8.83555e-05	3	13	DPYD, CES1, DUSP22	0.0400692	CAVARD_LIVER_CANCER_MALIGNANT_VS_BENIGN
0.000148247	18	378	PLSCR4, PIK3R5, SLC6A11, SMC1B, C1orf115, TACSTD2, LTB4R2, HIF3A, DRD5, RHCG, ALOX12, PTGIS, HTRA4, SCIN, CBLC, GPR83, PRLHR, CD164L2	0.0522573	MEISSNER_NPC_HCP_WITH_H3_UNMETHYLATED
0.000170039	11	176	LEPR, PACRG, HOXA5, LAMP3, CXCL2, MME, KCTD12, CRYAB, CES1, LAMA2, HSPB2	0.0522573	SMID_BREAST_CANCER_NORMAL_LIKE_UP
0.000172847	5	43	SMC1B, MLPH, PCDHB14, SPOCK3, ZPBP	0.0522573	SHETH_LIVER_CANCER_VS_TXNIP_LOSS_PAM5
0.00021478	3	16	SOX4, GDF15, EPS8	0.0584415	TONKS_TARGETS_OF_RUNX1_RUNX1T1_FUSION_SUSTAINED_IN_MONOCYTE_UP
0.000347252	6	68	RPH3A, DBX1, HPSE2, PCDHB7, PCDHA4, PCDHA2	0.0738871	MIKKELSEN_IPS_WITH_HCP_H3K27ME3
0.000355441	16	340	HOXB4, DLX1, CES1, HOXA5, MTNR1A, HOXA6, PKD2L2, OR2L13, NMNAT3, HTRA4, HIF3A, HORMAD2, MLPH, NPFFR2, SCIN, COL24A1	0.0738871	ACEVEDO_METHYLATED_IN_LIVER_CANCER_DN
0.000379896	18	407	DPYD, FUT9, CDK6, PCDHB7, MYO1B, TSPAN13, PCDHB14, B3GALNT1, DNAJC15, RPRM, AHR, ANK3, LEPR, MACROD2, GDF15, MLPH, LMCD1, TACSTD2	0.0738871	GOZGIT_ESR1_TARGETS_DN
0.000380162	6	69	TSPYL5, FAM50B, TPD52L1, FAAH, TACSTD2, GDF15	0.0738871	KIM_RESPONSE_TO_TSA_AND_DECITABINE_UP
0.000436853	3	19	SOX4, FAAH, CES1	0.0792451	SHIPP_DLBCL_CURED_VS_FATAL_UP
0.00053777	3	20	TACSTD2, HIST1H2AI, CXCL2	0.0914546	DAZARD_UV_RESPONSE_CLUSTER_G2
0.00074592	5	56	GABRB1, GPR6, SLC6A11, CHRNB1, CXCL2	0.119391	HILLION_HMGA1_TARGETS
0.000799099	2	10	HOXA5, HOXA6	0.120797	NIKOLSKY_BREAST_CANCER_7P15_AMPLICON
0.000938794	3	23	HSPB2, DSEL, CRYAB	0.134174	COWLING_MYCN_TARGETS
0.000986211	5	59	MLPH, TSPAN13, CXCL2, LMCD1, MYO1B	0.134174	ONDER_CDH1_SIGNALING_VIA_CTNNB1
0.00108105	30	891	PRKAA2, C4orf19, DUSP22, DNAH9, MACROD2, SASH1, TMEM190, RAB37, RHCG, SLC6A11, SIX1, KIF19, CCDC19, FGF9, GDF15, TACSTD2, RIBC2, CES1, SCIN, KIAA1377, KIF6, MLPH, PACRG, ACRBP, C15orf26, C20orf85, CNKSR1, TMEM61, UNC13B, SPOCK3	0.137222	DODD_NASOPHARYNGEAL_CARCINOMA_UP
0.00110948	3	24	ACRBP, ZPBP, SPACA1	0.137222	WEBER_METHYLATED_HCP_IN_FIBROBLAST_DN
0.00142328	2	12	GDF15, CXCL2	0.146363	LIAN_LIPA_TARGETS_3M
0.00142328	2	12	MLPH, TSPAN13	0.146363	FARMER_BREAST_CANCER_CLUSTER_6
0.0014329	6	86	HOXA5, FOXD1, KLHL30, HOXA6, ALX1, GDF15	0.146363	KATSANOU_ELAVL1_TARGETS_UP
0.00151404	3	26	CRYAB, CHRNB1, TACSTD2	0.146363	KOHOUTEK_CCNT1_TARGETS
0.00158944	4	44	LAMA2, B3GALNT1, PDPN, LEPR	0.146363	YAO_HOXA10_TARGETS_VIA_PROGESTERONE_UP
0.00175047	3	27	NPFFR2, GPR6, TACSTD2	0.146363	HENDRICKS_SMARCA4_TARGETS_DN
0.00177659	5	66	HOXB13, ADD2, SPOCK3, CHGB, CES1	0.146363	ROESSLER_LIVER_CANCER_METASTASIS_UP
0.00182376	2	13	ALX1, CXCL2	0.146363	NEWMAN_ERCC6_TARGETS_UP
0.00182376	2	13	SOX4, FOXD1	0.146363	NIELSEN_GIST_VS_SYNOVIAL_SARCOMA_UP
0.00192019	5	67	EXOC3L2, AHR, PSMC3, TSPAN13, CBLC	0.146363	ROVERSI_GLIOMA_COPY_NUMBER_UP
0.00192019	5	67	TMEM204, PAK7, TSPYL5, LEPR, DNAJC15	0.146363	HOELZEL_NF1_TARGETS_DN
0.00201134	3	28	DUSP22, B3GALNT1, LAMA2	0.146363	ZHAN_MULTIPLE_MYELOMA_CD2_UP
0.00228793	2	14	SOX4, ADD2	0.146363	AKL_HTLV1_INFECTION_UP
0.00228793	2	14	GDF15, SOX4	0.146363	WALLACE_PROSTATE_CANCER_UP
0.00228793	2	14	ACRBP, ZPBP	0.146363	WEBER_METHYLATED_HCP_IN_SPERM_DN
0.00228793	2	14	FUT7, FUT9	0.146363	WAGNER_APO2_SENSITIVITY
0.00228793	2	14	KCNK5, HOXA5	0.146363	VALK_AML_CLUSTER_2
0.00228793	2	14	GPR83, CDK6	0.146363	ONO_AML1_TARGETS_DN
0.00228793	2	14	COL24A1, PCDHB6	0.146363	MIKKELSEN_ES_ICP_WITH_H3K27ME3
0.0022979	3	29	ADD2, FAAH, P2RY6	0.146363	GYORFFY_DOXORUBICIN_RESISTANCE
0.00240401	5	70	FAM64A, GDF15, CRYAB, ARHGAP29, KCTD12	0.146363	KAN_RESPONSE_TO_ARSENIC_TRIOXIDE
0.0024049	7	120	GNG12, FGF9, KCTD12, CRYAB, TACSTD2, CYB5A, ANK3	0.146363	LI_WILMS_TUMOR_VS_FETAL_KIDNEY_1_UP
0.00254291	28	860	GNAS, FGF9, RPRM, HTRA4, HTR1A, C4orf19, SASH1, NXNL2, LTB4R2, SYT14, AVPR1A, GHSR, UNC13B, SLC6A11, DRD5, PRLHR, DLX1, ALOX12, EMX2, PIK3R5, ARHGAP29, TACSTD2, FAM64A, GPR83, FOXD1, PTGIS, SCIN, C1orf115	0.146363	MEISSNER_BRAIN_HCP_WITH_H3K4ME3_AND_H3K27ME3
0.00261139	3	30	CHRNE, PCDHGA1, MME	0.146363	WILCOX_RESPONSE_TO_PROGESTERONE_DN
0.00261139	3	30	DSEL, TPD52L1, PTGIS	0.146363	PAPASPYRIDONOS_UNSTABLE_ATEROSCLEROTIC_PLAQUE_DN
0.00261139	3	30	ALX1, FUT7, MME	0.146363	KIM_BIPOLAR_DISORDER_OLIGODENDROCYTE_DENSITY_CORR_DN
0.00263572	11	240	SASH1, HOXA5, PTGIS, LEPR, TSPAN13, KCTD12, AHR, LAMA2, MYO1B, HOXA6, FGF9	0.146363	SWEET_LUNG_CANCER_KRAS_DN
0.00281902	2	15	DSEL, ZFP42	0.153411	LI_CISPLATIN_RESISTANCE_DN
0.00307953	4	51	MYO1B, KCTD12, LMCD1, CRYAB	0.164302	GAUSSMANN_MLL_AF4_FUSION_TARGETS_E_UP
0.00342	2	16	SOX4, GDF15	0.175581	GENTILE_UV_LOW_DOSE_UP
0.00342	2	16	CYB5A, C1orf115	0.175581	KIM_LIVER_CANCER_POOR_SURVIVAL_DN
0.00381386	8	158	RIBC2, TMEM190, C20orf85, C15orf26, DNAH9, CCDC19, PACRG, CES1	0.192176	SENGUPTA_NASOPHARYNGEAL_CARCINOMA_DN
0.00409358	2	17	CRYAB, GDF15	0.195415	MAHADEVAN_RESPONSE_TO_MP470_DN
0.00409358	2	17	PSMC3, HIST1H2AI	0.195415	JAZAG_TGFB1_SIGNALING_DN
0.00409358	2	17	PAK7, GDAP1L1	0.195415	MEISSNER_BRAIN_ICP_WITH_H3K4ME3
0.00462455	3	35	TULP1, FIGNL1, HOXA6	0.213278	RASHI_RESPONSE_TO_IONIZING_RADIATION_3
0.00462455	3	35	PCDHB14, LAMA2, UNC5D	0.213278	GYORFFY_MITOXANTRONE_RESISTANCE
0.00484226	2	18	PRKAA2, ARHGAP29	0.217963	YANAGIHARA_ESX1_TARGETS
0.00499619	4	57	DPYD, KCTD12, ARHGAP29, GNG12	0.217963	HUANG_DASATINIB_RESISTANCE_UP
0.00529627	5	82	CES1, AHR, SOX4, HOXA5, LAMP3	0.217963	TAKEDA_TARGETS_OF_NUP98_HOXA9_FUSION_16D_UP
0.00538259	4	58	KCNK5, UNC13B, ADD2, MTNR1A	0.217963	LABBE_TGFB1_TARGETS_UP
0.00561835	5	83	HOXA5, KCNK5, CXCL2, GDF15, HOXA6	0.217963	VERHAAK_AML_WITH_NPM1_MUTATED_UP
0.00566827	2	19	KCNK5, TPD52L1	0.217963	WILLIAMS_ESR1_TARGETS_UP
0.00566827	2	19	GDF15, CXCL2	0.217963	LIAN_LIPA_TARGETS_6M
0.00566827	2	19	CES1, MACROD2	0.217963	CAMPS_COLON_CANCER_COPY_NUMBER_DN
0.00566827	2	19	CXCL2, LEPR	0.217963	HUANG_FOXA2_TARGETS_DN
0.00566827	2	19	HOXA5, KCNK5	0.217963	VALK_AML_WITH_FLT3_ITD
0.00566827	2	19	TACSTD2, RHCG	0.217963	BOSCO_EPITHELIAL_DIFFERENTIATION_MODULE
0.00578967	4	59	HIST1H4E, HIST1H2AJ, OSBPL1A, HIST1H2AI	0.217963	ACEVEDO_LIVER_CANCER_WITH_H3K9ME3_DN
0.00578967	4	59	CDK6, MYO1B, MME, DNAJC15	0.217963	DUTERTRE_ESTRADIOL_RESPONSE_6HR_DN
0.00584759	10	232	LAMP3, KCNK5, HOXA5, CXCL2, MME, PDPN, LEPR, PTGIS, HSPB2, CRYAB	0.217963	SMID_BREAST_CANCER_LUMINAL_B_DN
0.00602593	6	111	HOXA5, SOX4, AHR, ANK3, EPS8, GDF15	0.221575	TONKS_TARGETS_OF_RUNX1_RUNX1T1_FUSION_HSC_UP
0.0061409	8	170	AVPR1A, FOXD1, CXCL2, SASH1, PCDHB7, ALX1, MME, DPYD	0.22262	WANG_MLL_TARGETS
0.00621798	4	60	TPD52L1, PTGIS, CRYAB, ARHGAP29	0.22262	IZADPANAH_STEM_CELL_ADIPOSE_VS_BONE_DN
0.00644978	16	446	GHSR, ALOX12, SLC6A11, CBLC, TACSTD2, RAB37, TEKT4, CHGB, TULP1, HTR1A, EXOC3L2, CD164L2, DBX1, ALX1, CRH, RHCG	0.223586	MIKKELSEN_MEF_HCP_WITH_H3K27ME3
0.00657365	2	20	PTGIS, CHGB	0.223586	RICKMAN_HEAD_AND_NECK_CANCER_F
0.00657365	2	20	PTGIS, B3GALNT1	0.223586	CHEN_LVAD_SUPPORT_OF_FAILING_HEART_DN
0.00657365	2	20	SIX1, RPRM	0.223586	WANG_LSD1_TARGETS_UP
0.0068377	3	39	TRPC6, SOX4, KIF6	0.229696	DARWICHE_PAPILLOMA_PROGRESSION_RISK
0.00717733	22	682	OR2L13, DDX25, GPR83, RPH3A, ACRBP, CES1, CHRNB1, RAB37, CBLC, FBXO41, RPRM, C20orf85, GPR78, NPFFR2, PKD2L2, PCDHB15, FAM50B, LAMA2, SCIN, NPM2, NXNL2, PCDHA2	0.238165	ZWANG_TRANSIENTLY_UP_BY_2ND_EGF_PULSE_ONLY
0.00756023	2	21	ALOX12, CES1	0.242016	RICKMAN_HEAD_AND_NECK_CANCER_E
0.00756023	2	21	RHCG, PDPN	0.242016	HUPER_BREAST_BASAL_VS_LUMINAL_UP
0.00756023	2	21	TSPAN13, TPD52L1	0.242016	HOLLERN_MICROACINAR_BREAST_TUMOR_UP

## Sheet: S5b. MM
pvalue	nhyper	ntotal	genes	padj	pathway
4.9e-13	43	333	FBXO39, KCNA4, SPAG6, CNTNAP5, REC8, LCK, COL1A2, TRIP6, VAMP5, SLC5A7, NECAB1, KCNJ3, KCNH7, TSHR, CYP27A1, LSP1, HSPB6, AGTR1, TACR3, EIF4EBP3, CNNM1, ZIK1, CPT1B, CD300A, RINL, SEC31B, FRZB, AOX1, ZNF154, AMT, ACOT12, C3orf62, ZNF643, TACR1, GABRA2, C10orf116, SLC27A6, GIPC2, SYT10, ZNF177, PAX9, GRID2, MOS	1.41e-09	HATADA_METHYLATED_IN_LUNG_CANCER_UP
6.98e-10	22	130	GNMT, MARVELD2, ADAM32, HORMAD2, LTB4R, HSF5, CHAD, MTNR1A, TM6SF2, RPH3A, REC8, PLVAP, NLGN2, C3orf62, ACRBP, NECAB1, PCDHB14, SCG3, BCL2L10, SPAG6, CNTNAP2, SYCP1	1.01e-06	MIKKELSEN_MEF_HCP_WITH_H3_UNMETHYLATED
1.42e-08	25	189	GREM2, CHGA, LEPR, VSTM2A, PTGER3, SVEP1, DNAJC6, ESRRG, SST, GPX3, PCDH7, SLC2A2, FIGN, RGS4, CKMT2, AGTR1, PDGFC, LAMA2, SOX2, PDK4, CHGB, FUT9, SYNM, PTPRZ1, PNOC	1.37e-05	VECCHI_GASTRIC_CANCER_EARLY_DN
2.48e-08	46	514	FOXG1, SOX2, GPR4, C20orf103, ZNF804A, BCAN, MOS, AP1M2, SST, CDH8, C9orf172, TACR1, FOXD4, SIX3, DNAJC6, GRIA2, RAB37, SLC46A2, KCNH7, LEFTY2, PCDH8, CHGA, IQSEC3, DPYS, CHGB, CRHBP, CD164L2, CARTPT, CNNM1, LAMC2, DBX1, LUZP2, SLC34A2, CALB1, DLEU7, EPHX3, GRHL2, PTGDR, TACR3, SLC5A1, VSTM2A, SYT10, SLITRK3, FOXE3, BARHL2, THBS4	1.79e-05	MIKKELSEN_MEF_HCP_WITH_H3K27ME3
8.46e-08	64	860	RARRES1, CRMP1, PHYHIPL, PCDH17, KCNIP4, GRIA2, TACR1, KCNC2, FOXD4L1, RXRG, COL24A1, NOXO1, GABRA2, SYT10, PTGFR, C4orf22, PTGER3, PCDH8, FOXG1, CFTR, GPC5, GABRA4, RASGRF2, SPAG6, TBR1, ZIC1, FBXO39, KCNJ3, HPSE2, ATOH1, CRHBP, LHX8, NOL4, PAX9, CNNM1, FAM5C, FAM84A, VIPR2, GPR83, KLHL35, SEMA6D, TRPC6, PTGDR, RAB6C, SIX3, DGKI, ACADL, C20orf103, ZAR1, BHMT, OXCT2, ERG, GRIK1, FOXE3, BARHL2, MY…	4.88e-05	BENPORATH_SUZ12_TARGETS
1.14e-07	20	143	GPNMB, GREM2, RERG, PCDH7, SST, FAM5C, CHGB, KCNIP4, SCG2, TM6SF2, FLRT2, MEOX2, GPX3, VSTM2A, MYLK, HAPLN1, GPC6, CHAD, SEMA6D, CHGA	5.5e-05	SABATES_COLORECTAL_ADENOMA_DN
2.05e-07	65	900	LCK, OXCT2, TDRD5, HMCN1, ANKRD45, NMNAT2, SPAG6, PHYHIPL, SH2D4B, LSP1, MYEOV, CXCR5, LMO2, PTPRCAP, GPR83, RPH3A, ACRBP, SYT10, KLHL1, FOXG1, CDH8, NLGN2, ZPBP2, KCNH6, RAB37, UTS2R, P2RX1, CHAD, HSF5, ZNF221, ZIK1, RINL, CNTD2, CYP2A6, GPR4, ZNF415, ZNF677, FOXD4L1, KCNJ3, TBR1, ZNF804A, FBXO41, C2orf65, ZSWIM2, ACADL, ADRA1D, AGTR1, RBP1, PEX5L, NPFFR2, PCDH10, PKD2L2, UGT3A2, C1QTNF2, LAMA2,…	8.44e-05	ZWANG_TRANSIENTLY_UP_BY_2ND_EGF_PULSE_ONLY
3.64e-07	67	953	KLHL1, OXCT2, HOXD8, SCIN, LHX8, FOXD4L1, P2RX5, KCNIP4, TACR1, COL24A1, KCNH7, GCM2, GPC5, PTGFR, RXRG, BARHL2, FLRT2, NOXO1, KCNC2, GABRA4, SPAG6, ATOH1, PRKD1, GRIK1, DGKI, CHAD, FOXG1, RPS6KA2, HPSE2, FOXE3, GRIA2, CRMP1, PCDH8, SIX3, ZIC1, KLHL35, PAX9, PTGDR, PDE1B, HOXA2, CYP2A6, PTGER3, ACADL, PHYHIPL, RAB6C, CNNM1, MEOX2, PCDH17, TBR1, MYF6, FUT9, FAM84A, SLITRK3, ASCL4, KCNJ3, BCAN, COX…	0.000131105	BENPORATH_ES_WITH_H3K27ME3
8.5e-07	11	55	RUNX1T1, ZIC1, GAS2, ZPBP2, ACADL, ERG, C16orf73, ATOH1, ASCL4, NLRP14, GRM3	0.000272424	KONDO_PROSTATE_CANCER_WITH_H3K27ME3
1.42e-06	37	431	CCDC68, ZIK1, LAMA2, C11orf74, PGAM2, ADHFE1, ZNF239, CNKSR1, LHCGR, CXCL2, FN3K, HSPB6, FAM83E, KCNA4, LRRN4CL, AKR1E2, ZNF585A, AOX1, ZNF418, FAM198B, PTPRCAP, COX6B2, PON3, CPT1C, CPT1B, SPARC, FITM1, GNG11, G0S2, PYROXD2, ZP3, GMPPA, ELF3, EHHADH, NPFFR2, MGST1, S1PR4	0.000410564	MIKKELSEN_ES_ICP_WITH_H3K4ME3
2.68e-06	60	869	BCAN, MTNR1A, GRM3, NLGN1, KCNC2, PDE4B, VAMP5, KCND2, GRIK1, HRASLS5, CHKB, GNG11, GPX1, PDE3A, KCNH7, CHGB, PGAM2, SNCA, NLGN2, CYP2E1, CFTR, SST, PTGFR, PTGER3, FOXG1, TSHR, CRYGD, CRHBP, UTS2R, ADRA1D, CDO1, DPYS, CHRNE, FOXD4, FAAH, HSPB6, PNOC, GULP1, ZP3, BARHL2, SLC5A1, LEPR, EHHADH, CARTPT, LHCGR, VSNL1, THBS4, CORT, KCNA4, BHMT, GNMT, SLC24A2, SCG3, CDH8, HOOK1, P2RX1, MTMR7, P2RY6, TAC…	0.000701521	YOSHIMURA_MAPK8_TARGETS_UP
8.33e-06	16	129	PCDHGB7, ZNF582, THBS4, FAM83B, CRHBP, ZNF501, MOS, IL11RA, PCDHGB4, PCDHB14, ZNF154, PCDHB9, LHCGR, BTBD3, KRTCAP3, ZSCAN1	0.00187414	FIGUEROA_AML_METHYLATION_CLUSTER_3_UP
8.45e-06	60	901	HIST1H3I, COL24A1, GRM3, MYF6, VIPR2, HOXA2, NOL4, FOXD4L1, FAM84A, HIST1H2BL, FLRT2, C4orf22, FBXO39, GABRA4, KCNC2, RAB6C, IRAK3, SEMA6D, SPAG6, HOXD8, P2RX5, GRIK1, SLITRK3, PCDH10, PTGFR, STEAP4, GPC5, C20orf103, TBR1, PTGER3, FOXG1, EPHX3, SYT10, PTGDR, HIST1H3C, BARHL2, CRHBP, DCLK1, ZIC1, GABRA2, GCM2, CNNM1, KLHL35, BCL2L10, PCDH8, GRIA2, HOXA6, MEOX2, OXCT2, SCIN, LHX8, PAX9, DGKI, ATOH1…	0.00187414	BENPORATH_EED_TARGETS
1.87e-05	26	290	P2RX5, SLC6A15, PTPRCAP, ZIC1, FRZB, CYR61, GSTP1, MYLK, PTPRZ1, HOXA5, CXCL2, SVEP1, PTGFR, CLIC3, LTF, PVRIG, SLC2A3, MEOX2, RARRES1, LCK, SYNM, KCNN4, SLC34A2, LEPR, RND3, ACADL	0.00384336	SMID_BREAST_CANCER_LUMINAL_B_DN
2.04e-05	17	152	GRIK1, THBS4, KCND2, SIX3, ZIC1, CKMT2, PAX9, TBR1, RUNX1T1, CFTR, SNTG1, HAPLN1, PCDH10, GABRA2, KCNJ3, MYF6, C16orf73	0.00392178	YAUCH_HEDGEHOG_SIGNALING_PARACRINE_DN
4.13e-05	7	35	REC8, SYCP1, ACRBP, ZPBP, SPACA1, HRASLS5, ZPBP2	0.00743645	WEBER_METHYLATED_HCP_IN_FIBROBLAST_DN
4.54e-05	13	105	BHMT, MGST1, CYP27A1, CDO1, CYP2A6, CRHBP, AGTR1, DPYS, AOX1, PLOD2, SLC2A2, CYP2E1, PON3	0.00770658	HSIAO_LIVER_SPECIFIC_GENES
5.28e-05	14	120	GPC6, CLIC3, RUNX1T1, C10orf116, LTF, FAM198B, FIGN, SLITRK3, FAM83E, PLD1, LEFTY2, SGK1, FAM26F, LAMC2	0.00845191	MOHANKUMAR_HOXA1_TARGETS_DN
5.66e-05	21	226	LEPR, VAMP5, HOXA5, CXCL2, CXCR5, MYLK, ITGAL, MEOX2, GNG11, LCK, SVEP1, FRZB, CDO1, SYNM, PNOC, PVRIG, PTPRCAP, RUNX1T1, P2RX5, LAMA2, FLRT2	0.00859776	SMID_BREAST_CANCER_NORMAL_LIKE_UP
6.33e-05	24	277	NOL4, GMPPA, ZNF608, ZIK1, AOX1, PLD1, ZSWIM2, AKR1E2, PCDHB13, G0S2, CPT1C, HDAC9, ZNF239, ZNF585A, GRM3, KCND2, PDE4B, SPARC, MGST1, ADHFE1, C11orf74, HSPB6, KCNA4, ZNF418	0.00912557	MIKKELSEN_NPC_ICP_WITH_H3K4ME3
6.91e-05	15	137	GPNMB, MYLK, SPARC, COL1A2, GJA1, FLRT2, SEPT10, CTSL1, CYP27A1, NEXN, RND3, DCLK1, IRAK3, PLD1, FAM198B	0.00948917	PICCALUGA_ANGIOIMMUNOBLASTIC_LYMPHOMA_UP
7.5e-05	5	20	RAB27B, AOX1, CCDC68, PDK4, FAM83B	0.00982961	PEDERSEN_METASTASIS_BY_ERBB2_ISOFORM_6
0.000101603	5	21	GJA1, PEG10, EGLN3, HAPLN1, MGST1	0.0127401	LI_CISPLATIN_RESISTANCE_UP
0.000118497	19	205	KCNA4, PCDHB13, KCNC2, SVEP1, FRZB, PAX9, HDAC9, PLEK2, TBX15, CCDC68, CXCL2, RSPH9, CDO1, STEAP4, KIAA1024, PDK4, G0S2, PTGFR, CD14	0.0140352	WANG_MLL_TARGETS
0.000121664	14	129	PTGFR, PDK4, SVEP1, RPS6KA2, RARRES1, CLDN11, GPC6, DEPDC7, RAB27B, CXCL6, HAS2, PDZRN3, GULP1, PDE4B	0.0140352	RIGGI_EWING_SARCOMA_PROGENITOR_DN
0.000135217	5	22	SPAG6, ZPBP2, ACRBP, ZPBP, SYCP1	0.0146179	WEBER_METHYLATED_HCP_IN_SPERM_DN
0.000136853	7	41	ITGBL1, CRYGD, CBR1, RBP1, RARRES1, TCTEX1D1, G0S2	0.0146179	NOUSHMEHR_GBM_SILENCED_BY_METHYLATION
0.000176204	4	15	CALB1, SP8, GJA1, SOX2	0.0176093	KORKOLA_EMBRYONIC_CARCINOMA_VS_SEMINOMA_UP
0.00017707	5	23	CXCL2, LOXL2, LEPR, CLIC3, SPARC	0.0176093	HUANG_FOXA2_TARGETS_DN
0.00019806	38	557	SLC10A4, GRIA2, C20orf103, FAM5C, SEMA6D, CNNM1, PTGER3, ZIC1, DGKI, MYF6, FOXD4L1, RAB6C, NOL4, PAX9, OXCT2, TBR1, GRIK1, GPC5, SPAG6, ATOH1, GABRA2, LHX8, HOXD8, PTGDR, GABRA4, KLHL35, KCNC2, SLITRK3, PCDH17, HPSE2, FAM84A, SIX3, COL24A1, PCDH8, BARHL2, PTGFR, FLRT2, FOXG1	0.0190402	BENPORATH_PRC2_TARGETS
0.000216168	18	198	SYT10, GLRB, SCIN, GNMT, MOCS1, P2RX1, G0S2, TACR3, COL23A1, GPX3, MYLK, HDAC9, SYNM, ACRBP, HSPB6, C9orf125, LIMS2, FUT9	0.0200578	ACEVEDO_FGFR1_TARGETS_IN_PROSTATE_CANCER_MODEL_DN
0.000228522	5	24	DCLK1, PDK4, THBS4, CHGB, NEXN	0.0200578	RICKMAN_HEAD_AND_NECK_CANCER_F
0.00022951	7	44	PTGER3, SVEP1, LEPR, LAMA2, C20orf103, C10orf116, G0S2	0.0200578	SMID_BREAST_CANCER_LUMINAL_A_UP
0.000277458	13	124	MGA, SEMA3C, GLRB, CYP2E1, SEMA6D, LMO2, PKHD1L1, COL1A2, SCIN, PRKD1, SYCP2L, STEAP4, CR1L	0.0229082	ACEVEDO_LIVER_CANCER_WITH_H3K27ME3_UP
0.000278012	10	82	C6orf118, ASPG, TBC1D10C, CNTNAP2, KCNN4, RINL, MRPS21, EBI3, NOXO1, AMT	0.0229082	MIKKELSEN_IPS_LCP_WITH_H3K4ME3
0.000306227	6	35	COL1A2, RBP1, SPARC, G0S2, LAMC2, SLC2A3	0.0245322	CROMER_TUMORIGENESIS_UP
0.000315965	7	46	GPX3, GPNMB, HDAC9, AGTR1, PLOD2, LTF, RXRG	0.0246282	LIU_VAV3_PROSTATE_CARCINOGENESIS_UP
0.000365588	19	223	ELF3, C6orf118, LTF, TCTEX1D1, C9orf135, DNAH12, TMEM190, CLIC3, C10orf116, C11orf74, C15orf26, SPAG6, C4orf22, DNAH9, RSPH9, TEKT1, CCDC81, WDR66, CCDC11	0.0267664	SENGUPTA_NASOPHARYNGEAL_CARCINOMA_DN
0.00037124	3	10	HOXA2, HOXA5, HOXA6	0.0267664	NIKOLSKY_BREAST_CANCER_7P15_AMPLICON
0.00037124	3	10	GPNMB, SLC2A3, HOXD8	0.0267664	ITO_PTTG1_TARGETS_UP
0.000427301	7	48	SGK1, PCDH7, PCDH17, ACADL, GNG11, PEG10, SEMA3C	0.0298772	BEGUM_TARGETS_OF_PAX3_FOXO1_FUSION_UP
0.000444877	17	193	COL1A2, RGS4, AOX1, PTGFR, DGKI, GULP1, GLRB, RPS6KA2, GNG11, AGTR1, ITGBL1, SYNM, HAS2, PLOD2, SPARC, LEPR, HOXA5	0.0298772	ONDER_CDH1_TARGETS_2_UP
0.000453386	15	161	LOXL2, GPNMB, HAS2, PDZRN3, SLC2A3, RPS6KA2, COL1A2, SYNM, SPARC, ZNF239, PLOD2, EIF5A2, ANKRD57, FAM198B, SEMA3C	0.0298772	MIYAGAWA_TARGETS_OF_EWSR1_ETS_FUSIONS_DN
0.000455824	5	27	CXCL2, ANKRD57, RND3, CYR61, SLC35D2	0.0298772	AMIT_EGF_RESPONSE_60_MCF10A
0.000512489	11	102	PTH2R, COL1A2, GPNMB, FAM5C, NOL4, GRM3, MARCH1, KLHL1, PTGFR, KCND2, ZNF608	0.0316204	MIKKELSEN_ES_ICP_WITH_H3K4ME3_AND_H3K27ME3
0.000548899	9	75	HDAC9, CYR61, AGTR1, GULP1, MLF1, GJA1, THBS4, LEPR, GAS2	0.0316204	CERVERA_SDHB_TARGETS_2
0.000561589	5	28	PCDHB14, HOXD8, PCDHB12, ZNF804A, SLITRK3	0.0316204	MIKKELSEN_ES_HCP_WITH_H3K27ME3
0.000565779	3	11	GPX1, LMO2, LSP1	0.0316204	FERRANDO_LYL1_NEIGHBORS
0.000565779	3	11	CCDC68, SYNM, CTSL1	0.0316204	NIELSEN_GIST_VS_SYNOVIAL_SARCOMA_DN
0.000565779	3	11	C10orf116, PEG10, FOXG1	0.0316204	AZARE_NEOPLASTIC_TRANSFORMATION_BY_STAT3_DN
0.000565779	3	11	DEPDC7, DPYS, MYLK	0.0316204	MINGUEZ_LIVER_CANCER_VASCULAR_INVASION_DN
0.000570133	10	89	EHHADH, CDO1, PDK4, AOX1, CYP27A1, SLC2A2, CMBL, BHMT, ACADL, DEPDC7	0.0316204	CHIANG_LIVER_CANCER_SUBCLASS_PROLIFERATION_DN
0.000610128	31	452	CDO1, TACR3, TBR1, AP1M2, KCNH7, GPX3, HSF5, SEC31B, VAMP5, PKDREJ, KIAA1383, GNMT, P2RX5, SYCP1, LAMC2, SLC34A2, MARVELD2, NLGN2, SPAG6, THBS4, IRAK3, HTRA4, KIAA1024, CLDN11, SCIN, GIPC2, GPR83, MAL2, GRHL2, RASGRF2, CD164L2	0.0321763	MEISSNER_NPC_HCP_WITH_H3_UNMETHYLATED
0.000612017	11	104	PCDH8, SST, SCG3, HOXA2, COL1A2, RUNX1T1, HAPLN1, RBP1, SEMA3C, TAGLN3, CHGA	0.0321763	LEE_NEURAL_CREST_STEM_CELL_UP
0.000613626	6	39	IL11RA, PCDHGB7, CRHBP, THBS4, MOS, ZNF582	0.0321763	FIGUEROA_AML_METHYLATION_CLUSTER_2_UP
0.000685465	5	29	SPARC, SLC34A2, CCDC68, GPNMB, G0S2	0.0353015	YAMASHITA_METHYLATED_IN_PROSTATE_CANCER
0.000719625	6	40	SNCA, FLRT2, PCDH7, HDAC9, LOXL2, ELF3	0.0364105	ISSAEVA_MLL2_TARGETS
0.000776151	4	20	CHGA, CRMP1, CHGB, SCG2	0.0385934	RORIE_TARGETS_OF_EWSR1_FLI1_FUSION_DN
0.000823101	3	12	CPT1B, EHHADH, G0S2	0.0398701	SANDERSON_PPARA_TARGETS
0.000829474	5	30	SCG2, CHGB, RAB37, SCG3, GAS2	0.0398701	OSADA_ASCL1_TARGETS_UP
0.00103961	22	296	RPS6KA2, FRZB, AGTR1, NOVA1, LOXL2, GPNMB, GPX3, TPD52L1, DCLK1, TRPC4, STEAP4, HAPLN1, GREM2, RGS4, SYNM, CDO1, PDK4, PRKD1, SLC2A3, CLIC3, RUNX1T1, CXCL2	0.0491514	BOQUEST_STEM_CELL_CULTURED_VS_FRESH_UP
0.00109706	11	111	IL11RA, HOXA2, ZNF582, MRPS21, IRAK3, THBS4, CRHBP, FAM83B, FUT9, BTBD3, ZSCAN1	0.0503893	FIGUEROA_AML_METHYLATION_CLUSTER_6_UP
0.00112663	6	43	C10orf116, PDK4, GPX3, SVEP1, G0S2, PTGER3	0.0503893	NAKAYAMA_SOFT_TISSUE_TUMORS_PCA2_DN
0.00115315	3	13	CXCL6, CXCL2, CRHBP	0.0503893	GRAHAM_CML_QUIESCENT_VS_CML_DIVIDING_UP
0.00115315	3	13	LAMA2, PCDH8, PYROXD2	0.0503893	SUZUKI_RESPONSE_TO_TSA_AND_DECITABINE_1A
0.00115315	3	13	SGK1, LOXL2, CYR61	0.0503893	DASU_IL6_SIGNALING_SCAR_DN
0.0012066	20	263	SGK1, MTNR1A, ZSWIM2, KCNH6, PCDHB12, CCDC11, CMBL, LMO2, PDE4B, SLC2A3, GPR85, GALNT13, MYLK, MYEOV, SCIN, HIST3H2A, FAM83E, C10orf116, JSRP1, PTGER3	0.051938	ODONNELL_TFRC_TARGETS_UP
0.00129635	6	44	DPYS, HOXA5, SLC2A2, EHHADH, CYP2E1, BHMT	0.0549806	LEE_LIVER_CANCER_DENA_DN
0.00138494	7	57	AOX1, VIPR2, FRZB, HAS2, PTPRCAP, CKMT2, PNOC	0.0578864	BORCZUK_MALIGNANT_MESOTHELIOMA_DN
0.00143004	12	130	HIST1H2AJ, PCDHGB7, CRMP1, PCDHGB5, GPC6, AGTR1, PCDHGB6, MYF6, PCDHGB4, ZNF461, CCDC81, BTBD3	0.0589176	ACEVEDO_LIVER_CANCER_WITH_H3K27ME3_DN
0.00148453	8	71	GRHL2, SPINT2, AP1M2, PTGER3, C20orf103, C10orf116, MAL2, FRZB	0.0594239	LIEN_BREAST_CARCINOMA_METAPLASTIC_VS_DUCTAL_DN
0.00153201	4	23	RARRES1, CD300A, CTSL1, PLD1	0.0594239	APPEL_IMATINIB_RESPONSE
0.00153201	4	23	KCNA4, AOX1, SCG3, GJA1	0.0594239	HARRIS_BRAIN_CANCER_PROGENITORS
0.00153201	4	23	HOXD8, TPD52L1, FOXG1, MLF1	0.0594239	SCHRAETS_MLL_TARGETS_UP
0.00154535	32	498	FUT9, PCDH7, PCDHB14, SGK1, RAB27B, KCNJ3, FAM84A, GPNMB, NECAB1, EGLN3, SEMA3C, PCDH10, SLC27A6, GULP1, RND3, FAM198B, RERG, AOX1, SOX2, CMBL, LEPR, FAM162B, FIGN, GRHL2, C6orf118, HSH2D, HMCN1, DCLK1, ZNF223, RPS6KA2, HDAC9, PDZRN3	0.0594239	GOZGIT_ESR1_TARGETS_DN
0.00158208	14	164	KCND2, LAMA2, PEG10, DCLK1, SEMA3C, NOVA1, COL1A2, AOX1, SVEP1, ITGBL1, CDO1, GPNMB, FLRT2, PTGFR	0.0600359	BOQUEST_STEM_CELL_UP
0.00169534	6	46	CXCL2, G0S2, PLEK2, PTGFR, IRAK3, SLC6A15	0.063498	GHANDHI_BYSTANDER_IRRADIATION_UP
0.00172277	21	289	SEMA3C, GPX3, LMO2, CDO1, CKMT2, SNCA, RBP1, HOXA5, COL1A2, G0S2, CYR61, LEPR, TEKT1, CYP2E1, GNG11, SOX2, GREM2, MEOX2, LAMA2, SPARC, HOXA6	0.0635524	SWEET_LUNG_CANCER_KRAS_DN
0.00176137	9	87	TRIP6, CLIC3, COLEC11, TPD52L1, CDO1, FAAH, SST, LAMC2, C10orf116	0.0635524	KIM_RESPONSE_TO_TSA_AND_DECITABINE_UP
0.0017629	26	384	TPD52L1, LAMA2, COX16, AOX1, ESRRG, AMT, CXCR5, FAAH, KIAA1024, VSNL1, COLEC11, HOXA5, KCNA4, LSP1, GLS2, MYLK, CYP2A6, RARRES1, AGTR1, PLD1, LUZP2, CRHBP, MTNR1A, LEPR, PDZRN3, G0S2	0.0635524	WEST_ADRENOCORTICAL_TUMOR_DN
0.00180916	8	73	CTSL1, PDGFC, LMO2, CYR61, CXCL2, PTGFR, HAS2, CCDC68	0.064376	WINZEN_DEGRADED_VIA_KHSRP
0.00187503	4	24	CXCL2, RND3, CXCL6, EGLN3	0.064376	GROSS_HYPOXIA_VIA_ELK3_ONLY_UP
0.00187503	4	24	NOL4, KCNA4, PTH2R, KLHL1	0.064376	MIKKELSEN_MEF_ICP_WITH_H3K4ME3_AND_H3K27ME3
0.00187503	4	24	CHGA, SST, SLC2A2, FRZB	0.064376	KANG_GLIS3_TARGETS
0.00200485	11	119	HAS2, CFTR, C9orf68, VSTM2A, KCNJ3, CCDC11, RXRG, RUNX1T1, SLC5A7, CDH8, MAGOH	0.0680234	RAO_BOUND_BY_SALL4_ISOFORM_A
0.00215242	11	120	GPC6, SPARC, SLC2A3, GPNMB, ITGBL1, COL1A2, LAMA2, PLOD2, THBS4, PDGFC, RARRES1	0.0717142	VECCHI_GASTRIC_CANCER_ADVANCED_VS_EARLY_UP
0.00218823	8	75	PDK4, SGK1, RPS6KA2, PTGER3, RARRES1, CXCL2, GPNMB, PYROXD2	0.0717142	TAKEDA_TARGETS_OF_NUP98_HOXA9_FUSION_10D_DN
0.00218823	8	75	BARHL2, BTN1A1, EGLN3, PCDH7, PTGDR, FEZF1, MEOX2, PAX9	0.0717142	TANAKA_METHYLATED_IN_ESOPHAGEAL_CARCINOMA
0.00246537	6	49	PCDHGB6, C6orf118, RRP15, KCNA4, ZNF582, VSTM2A	0.0791685	NOUZOVA_METHYLATED_IN_APL
0.00247058	9	91	ZSCAN1, ZNF582, BTBD3, GNG11, PCDHB9, CRHBP, IL11RA, MOS, FAM83B	0.0791685	FIGUEROA_AML_METHYLATION_CLUSTER_1_UP
0.00258954	5	37	PEG10, RBP1, GJA1, ESRRG, SEMA3C	0.0813261	BECKER_TAMOXIFEN_RESISTANCE_DN
0.00262967	15	190	FLRT2, AGTR1, RALYL, VSNL1, TRIP6, GPX3, CHRNE, VAMP5, RBP1, PDE4B, KCNJ3, NMNAT2, MYLK, CHGB, CDO1	0.0813261	KAAB_HEART_ATRIUM_VS_VENTRICLE_UP
0.00267891	3	16	C10orf116, SPARC, VAMP5	0.0813261	GILDEA_METASTASIS
0.00267891	3	16	LAMA2, TMEM108, MYF6	0.0813261	SUZUKI_RESPONSE_TO_TSA_AND_DECITABINE_1B
0.00267891	3	16	ZNF608, IL2RA, GPR83	0.0813261	GAVIN_IL2_RESPONSIVE_FOXP3_TARGETS_UP
0.00277415	6	50	FIGN, PCDH10, FAM190A, RUNX1T1, HOXA2, FOXG1	0.0833402	DAWSON_METHYLATED_IN_LYMPHOMA_TCL1
0.00281202	10	108	EPHX3, PLEK2, MYEOV, SCIN, HSH2D, CLIC3, NOXO1, COL1A2, KCNN4, LAMC2	0.0836069	ANDERSEN_CHOLANGIOCARCINOMA_CLASS2
0.00298299	14	175	GJA1, PDE4B, RPS6KA2, SNCA, C20orf103, DCHS1, PTPRCAP, RUNX1T1, LTF, CLDN15, ERG, CYP2E1, SPARC, P2RX5	0.0877852	VERHAAK_AML_WITH_NPM1_MUTATED_DN
0.00302283	10	109	LTF, PTGDR, SNCA, LCK, NEXN, RASGRF2, PVRIG, SLC2A3, SGK1, CD14	0.0880591	JAATINEN_HEMATOPOIETIC_STEM_CELL_DN
0.00324016	4	27	G0S2, GJA1, PDE4B, CD14	0.0916139	CHEN_LVAD_SUPPORT_OF_FAILING_HEART_DN
0.00324016	4	27	CD14, SEMA3C, RBP1, HAS2	0.0916139	HAN_JNK_SINGALING_DN
0.00324016	4	27	SYNM, ZNF217, MCC, KCNN4	0.0916139	CROONQUIST_NRAS_VS_STROMAL_STIMULATION_UP
0.00356804	7	66	RINL, ASPG, EBI3, TBC1D10C, FBXO39, C6orf118, MRPS21	0.099905	MIKKELSEN_ES_LCP_WITH_H3K4ME3
0.00374006	22	327	KCNN4, P2RX5, VSNL1, CXCL2, CNTNAP2, GRHL2, SEMA3C, TAGLN3, C10orf116, LAMC2, AP1M2, G0S2, SNCA, SLC5A1, SPINT2, TPD52L1, PCDH7, SLC2A3, HOOK1, PTPRZ1, HDAC9, SLC6A15	0.103411	ONDER_CDH1_TARGETS_2_DN
0.00376496	15	197	RARRES1, KCNN4, PTGFR, SLC2A3, SYNM, PLOD2, LEFTY2, RBP1, ZIC1, HAPLN1, EPHX3, PTPRZ1, SYCP1, SIX3, PEG10	0.103411	SMID_BREAST_CANCER_RELAPSE_IN_BONE_DN
0.00388159	5	40	EHHADH, LEPR, PDK4, CHKB, GIPC2	0.105609	LEE_LIVER_CANCER_CIPROFIBRATE_UP
0.00399672	10	113	AMT, ACADS, SLC2A2, EHHADH, DEPDC7, ZP3, CDO1, LDHAL6A, AOX1, DPYS	0.107479	LEE_LIVER_CANCER_SURVIVAL_UP
0.00403649	8	82	RPH3A, DBX1, CALB1, SLITRK3, HPSE2, VSNL1, SIX3, HOXA2	0.107479	MIKKELSEN_IPS_WITH_HCP_H3K27ME3
0.00423874	3	18	BCAN, PCDH7, FOXG1	0.107479	LI_CISPLATIN_RESISTANCE_DN
0.00423874	3	18	SEMA6D, SEMA3C, RAB27B	0.107479	SHI_SPARC_TARGETS_UP
0.00423874	3	18	STEAP4, GPNMB, CXCL2	0.107479	LIAN_LIPA_TARGETS_3M
0.00423874	3	18	DNASE1L2, DHX40, SPARC	0.107479	BYSTRYKH_HEMATOPOIESIS_STEM_CELL_SCP2_QTL_TRANS
0.00423874	3	18	GAS2, LSP1, FIGN	0.107479	DELACROIX_RAR_TARGETS_DN
0.00424849	9	98	AGBL4, LEPR, GRIA2, PTGER3, KCNJ3, RERG, FAM5C, FRZB, SH2D4B	0.107479	YAUCH_HEDGEHOG_SIGNALING_PARACRINE_UP
0.00437042	18	255	PARVG, PDZRN3, RBP1, PCDH7, SVEP1, CYR61, SEMA6D, RND3, ITGAL, GNG11, COL1A2, PTPN7, GPC6, SPARC, MYLK, LCK, PNOC, EBI3	0.109603	LINDGREN_BLADDER_CANCER_CLUSTER_2B
0.004476	4	29	COL1A2, HAS2, SYNM, GULP1	0.111283	DACOSTA_ERCC3_ALLELE_XPCS_VS_TTD_DN
0.00470237	7	69	CD14, GPX3, COL1A2, RBP1, CXCL2, IL11RA, MYLK	0.115427	KEEN_RESPONSE_TO_ROSIGLITAZONE_DN
0.00472275	11	132	PDE4B, HOXA5, ZNF217, SEPT10, SLC35D2, CD226, SPARC, AGTR1, CRHBP, SLC2A3, ERG	0.115427	TONKS_TARGETS_OF_RUNX1_RUNX1T1_FUSION_HSC_UP
0.00487963	10	116	RARRES1, SYNM, MYLK, LTF, ELF3, TRIP6, LAMC2, MGST1, RND3, CLDN11	0.116452	TURASHVILI_BREAST_DUCTAL_CARCINOMA_VS_DUCTAL_NORMAL_DN
0.00488999	52	966	SEC31B, SVEP1, MAL2, CLDN11, GULP1, BCAN, TBR1, PKDREJ, HTRA4, SIX3, IRAK3, FIGN, GRHL2, PCDH17, PCDH8, VIPR2, RERG, AP1M2, RASGRF2, FRZB, LAMC2, CNNM1, PDE3A, PTGER3, SP8, C12orf56, GPC5, SOX2, SEMA3C, VAMP5, TACR3, CDCA7, EGLN3, GIPC2, RALYL, GPR83, ADRA1D, ZIC1, CYR61, TMEM108, CARTPT, PLOD2, ZNF804A, TBX15, KIAA1024, SCIN, PDZRN3, C4orf22, ZNF217, SWAP70, PDE1B, P2RX5	0.116452	MEISSNER_BRAIN_HCP_WITH_H3K4ME3_AND_H3K27ME3
0.00513613	7	70	MOS, P2RX1, MGST1, TACR1, CXCL2, GPX3, CTSL1	0.116452	HILLION_HMGA1_TARGETS
0.0052053	4	30	CXCL6, SEMA3C, COL1A2, LAMA2	0.116452	CLASPER_LYMPHATIC_VESSELS_DURING_METASTASIS_DN
0.0052053	4	30	SPARC, RBP1, MGA, LIMS2	0.116452	JEPSEN_SMRT_TARGETS
0.00520884	3	19	PTPRZ1, GRIA2, CRMP1	0.116452	GUENTHER_GROWTH_SPHERICAL_VS_ADHERENT_UP
0.00520884	3	19	PTH2R, CNTNAP2, ZIC1	0.116452	RICKMAN_HEAD_AND_NECK_CANCER_B
0.00520884	3	19	SPARC, GNG11, GRIK1	0.116452	DORSEY_GAB2_TARGETS
0.00520884	3	19	CYR61, PEG10, LMO2	0.116452	BACOLOD_RESISTANCE_TO_ALKYLATING_AGENTS_UP
0.00520884	3	19	HRASLS5, REC8, SPACA1	0.116452	WEBER_METHYLATED_HCP_IN_SPERM_UP
0.00520884	3	19	CD14, ITGBL1, GPNMB	0.116452	NAKAYAMA_SOFT_TISSUE_TUMORS_PCA1_UP
0.00547819	2	10	SLC34A2, TRIM59	0.117904	TUOMISTO_TUMOR_SUPPRESSION_BY_COL13A1_UP
0.00547819	2	10	CHGA, CRMP1	0.117904	AMUNDSON_GAMMA_RADIATION_RESISTANCE
0.00547819	2	10	COL1A2, SVEP1	0.117904	THUM_MIR21_TARGETS_HEART_DISEASE_UP
0.00547819	2	10	CXCR5, CXCL2	0.117904	KUROZUMI_RESPONSE_TO_ONCOCYTIC_VIRUS
0.00547819	2	10	ANKRD57, EGLN3	0.117904	PEDERSEN_METASTASIS_BY_ERBB2_ISOFORM_5
0.00559841	5	43	CBR1, EHHADH, SGK1, CTSL1, GIPC2	0.118749	LEE_LIVER_CANCER_ACOX1_UP
0.00559982	7	71	PDE4B, RGS4, COL1A2, C10orf116, PTGFR, RND3, RUNX1T1	0.118749	BROWNE_HCMV_INFECTION_20HR_DN
0.00587465	28	460	HOXA5, ZNF804A, C18orf34, COL6A5, MTNR1A, S1PR4, HOXA6, PDZRN3, PKD2L2, ZNF239, IL2RA, GPX1, MCC, PCDHGA2, HTRA4, RUNX1T1, VIPR2, HORMAD2, SVEP1, CDCA7, MAL2, NPFFR2, SEMA6D, SCIN, FAM190A, ZNF660, COL24A1, C16orf73	0.123668	ACEVEDO_METHYLATED_IN_LIVER_CANCER_DN
0.00601483	4	31	COL1A2, DCLK1, TRIM59, RRP15	0.124118	TURASHVILI_BREAST_DUCTAL_CARCINOMA_VS_DUCTAL_NORMAL_UP
0.00601483	4	31	ELF3, RGS4, GPX3, PLD1	0.124118	ABBUD_LIF_SIGNALING_1_UP
0.00604492	9	103	GPNMB, MARCH1, CD14, PDK4, SGK1, PYROXD2, CDH8, FAM198B, RPS6KA2	0.124118	TAKEDA_TARGETS_OF_NUP98_HOXA9_FUSION_8D_DN
0.0060682	13	171	ACADS, CYP27A1, MYLK, BHMT, AMT, GPX3, EHHADH, CD14, PDK4, CXCL2, CBR1, SLC2A2, PON3	0.124118	HOSHIDA_LIVER_CANCER_SUBCLASS_S3
0.00627769	5	44	STEAP4, CALB1, SLC6A15, PCDH7, MGST1	0.127401	RICKMAN_HEAD_AND_NECK_CANCER_C
0.00631702	3	20	SEPT10, SEMA3C, DNASE1L2	0.127401	YAO_TEMPORAL_RESPONSE_TO_PROGESTERONE_CLUSTER_15
0.00640262	14	190	C1QTNF2, GPC6, PCDH7, RBP1, DEK, HAS2, RARRES1, MYLK, CDCA7, FIGNL1, FAM198B, RUNX1T1, RGS4, CLDN11	0.12823	CHICAS_RB1_TARGETS_GROWING
0.00690898	4	32	PRDM5, PNOC, LAMA2, ZNF608	0.137355	ZHAN_MULTIPLE_MYELOMA_CD2_UP
0.00701496	5	45	SCG2, KCNT2, CLDN11, RGS4, LMO2	0.137355	CORRE_MULTIPLE_MYELOMA_UP
0.00704874	13	174	MAGOH, ZNF643, SEMA3C, PTPN7, FLRT2, LAMC2, ZNF217, PLOD2, RND3, ITGBL1, PLEK2, CYR61, HAPLN1	0.137355	KIM_WT1_TARGETS_12HR_DN
0.00704874	13	174	GAS2, ADHFE1, PCDH7, DCLK1, RUNX1T1, GULP1, ZIC1, MGST1, FIGNL1, RND3, ZNF608, PDK4, KCND2	0.137355	PLASARI_TGFB1_TARGETS_10HR_DN
0.00709948	11	139	LCK, LAMA2, CYP2E1, HSPB6, SVEP1, AOX1, C10orf116, HDAC9, RBP1, LIMS2, MYLK	0.137416	CAIRO_HEPATOBLASTOMA_CLASSES_DN
0.00732035	2	11	PEG10, LTF	0.140746	SMID_BREAST_CANCER_RELAPSE_IN_PLEURA_DN
0.00750461	11	140	CCDC68, LMO2, SWAP70, PLVAP, G0S2, PCDH17, TPD52L1, ERG, GNG11, RPS6KA2, GIPC2	0.142714	BOQUEST_STEM_CELL_DN
0.00757115	3	21	GSTP1, RARRES1, LAMC2	0.142714	LI_PROSTATE_CANCER_EPIGENETIC
0.00757115	3	21	CDO1, CYP27A1, SLC2A2	0.142714	KIM_LIVER_CANCER_POOR_SURVIVAL_DN
0.00771204	12	158	GJA1, EPHX3, PTPRZ1, GRHL2, VSNL1, LTB4R, TPD52L1, SPINT2, CLIC3, ANKRD57, LTF, LAMC2	0.143829	JAEGER_METASTASIS_DN
0.00773477	6	60	CNTNAP2, MEOX2, MARCH1, CCDC81, HAPLN1, MTMR7	0.143829	TAVAZOIE_METASTASIS
0.00777995	7	75	RASL11B, RPS6KA2, GNG11, TPD52L1, RBP1, LMO2, CD14	0.143829	MARKEY_RB1_CHRONIC_LOF_DN
0.00789203	4	33	MYLK, GPNMB, P2RY6, SGK1	0.144055	WOOD_EBV_EBNA1_TARGETS_DN
0.00789203	4	33	RARRES1, BHMT, MEOX2, G0S2	0.144055	LEE_LIVER_CANCER_MYC_DN
0.00841287	7	76	DNAJC6, TPD52L1, SLC6A15, ITGAL, RARRES1, PDK4, CXCL6	0.152445	SENGUPTA_NASOPHARYNGEAL_CARCINOMA_WITH_LMP1_DN
0.00845741	6	61	CDO1, RAB37, TACR3, SLC2A2, ADAM32, CDH8	0.152445	SERVITJA_ISLET_HNF1A_TARGETS_DN
0.00856553	8	92	SLC27A6, CMBL, RAB27B, HOXA5, DNAJC6, GJA1, C20orf103, CALB1	0.153435	TAKEDA_TARGETS_OF_NUP98_HOXA9_FUSION_8D_UP
0.00892593	9	109	CALB1, DNAJC6, LSP1, EGLN3, SLC27A6, RAB27B, HOXA5, C20orf103, NEXN	0.155056	TAKEDA_TARGETS_OF_NUP98_HOXA9_FUSION_10D_UP
0.00896816	4	34	DCLK1, MGST1, GPNMB, SGK1	0.155056	DEMAGALHAES_AGING_UP
0.00897864	3	22	SEMA6D, PDK4, CLIC3	0.155056	FUJII_YBX1_TARGETS_UP
0.00897864	3	22	CLDN11, LHCGR, GJA1	0.155056	MATZUK_MALE_REPRODUCTION_SERTOLI
0.00897864	3	22	CBR1, EGLN3, EHHADH	0.155056	WANG_ADIPOGENIC_GENES_REPRESSED_BY_SIRT1
0.00897864	3	22	PCDH10, GJA1, ESRRG	0.155056	IKEDA_MIR30_TARGETS_DN
0.00948609	2	12	SLC2A3, RUNX1T1	0.159058	DUNNE_TARGETS_OF_AML1_MTG8_FUSION_DN
0.00948609	2	12	CTSL1, SPARC	0.159058	OZANNE_AP1_TARGETS_UP
0.00948609	2	12	LTF, SLC34A2	0.159058	RICKMAN_HEAD_AND_NECK_CANCER_D
0.00948609	2	12	LTF, CTSL1	0.159058	LIAN_NEUTROPHIL_GRANULE_CONSTITUENTS
0.00948609	2	12	ITGBL1, FRZB	0.159058	FINAK_BREAST_CANCER_SDPP_SIGNATURE
0.00960137	5	48	FAM198B, FIGN, PCDH17, HOXA5, SEMA3C	0.15914	TAKEDA_TARGETS_OF_NUP98_HOXA9_FUSION_6HR_UP
0.00960137	5	48	PTGER3, HOXA5, RBP1, LEPR, C10orf116	0.15914	VANHARANTA_UTERINE_FIBROID_DN
0.0100498	6	63	CALB1, GJA1, VSNL1, GRM3, KCND2, DCLK1	0.164314	LEE_TARGETS_OF_PTCH1_AND_SUFU_DN
0.0101414	4	35	SPARC, RBP1, COL1A2, ITGAL	0.164314	KHETCHOUMIAN_TRIM24_TARGETS_UP
0.0101414	4	35	EPHX3, CYP2E1, PAX9, RARRES1	0.164314	RICKMAN_HEAD_AND_NECK_CANCER_E
0.0101414	4	35	PCDH7, PTGER3, TACR3, MTMR7	0.164314	BROWNE_HCMV_INFECTION_4HR_UP
0.0105463	3	23	RGS4, ITGBL1, HAPLN1	0.168851	NEWMAN_ERCC6_TARGETS_DN
0.0105463	3	23	FOXG1, RBP1, KCNN4	0.168851	PLASARI_TGFB1_SIGNALING_VIA_NFIC_1HR_UP
0.0105971	5	49	CXCL2, C3orf14, ERG, CRHBP, CXCL6	0.168851	GRAHAM_CML_DIVIDING_VS_NORMAL_QUIESCENT_DN
0.0107123	9	112	TBX15, COLEC11, GLS2, COL1A2, MAL2, KCNT2, GPNMB, MCC, RAB27B	0.169748	CHIANG_LIVER_CANCER_SUBCLASS_CTNNB1_DN
0.0111884	8	96	COL24A1, KLHL1, SNCA, KCND2, PCDHGA1, PTH2R, FAM5C, GRM3	0.176325	MIKKELSEN_IPS_ICP_WITH_H3K4ME3_AND_H327ME3
0.0114157	4	36	CXCL6, CRHBP, EBI3, CXCL2	0.177962	GRAHAM_NORMAL_QUIESCENT_VS_NORMAL_DIVIDING_UP
0.0114157	4	36	CNTN5, GNG11, RPL13A, FRZB	0.177962	ZHAN_MULTIPLE_MYELOMA_HP_UP
0.011986	2	13	VSNL1, LSP1	0.1807	WEST_ADRENOCORTICAL_TUMOR_MARKERS_DN
0.011986	2	13	MGST1, GPNMB	0.1807	GAUSSMANN_MLL_AF4_FUSION_TARGETS_E_DN
0.011986	2	13	SPINT2, LTF	0.1807	KAMIKUBO_MYELOID_CEBPA_NETWORK
0.011986	2	13	COL1A2, SPARC	0.1807	FARMER_BREAST_CANCER_CLUSTER_4
0.012096	28	486	FAAH, FAM83E, GNMT, C10orf116, SEMA3C, SVEP1, ITGBL1, KCNJ3, DCLK1, AOX1, MEOX2, AGTR1, PTGER3, NOVA1, GJA1, C20orf103, CNTNAP2, CHAD, CYP2E1, FAM198B, RAB27B, C3orf14, GRIA2, CYP2A6, THBS4, FAM5C, GLRB, ESRRG	0.1807	SMID_BREAST_CANCER_BASAL_DN
0.0121707	7	81	TPD52L1, PLOD2, LOXL2, SST, RGS4, LHX8, DHX40	0.1807	IZADPANAH_STEM_CELL_ADIPOSE_VS_BONE_DN
0.0122806	3	24	MOS, ZNF217, LAMC2	0.1807	CHIN_BREAST_CANCER_COPY_NUMBER_UP
0.0122806	3	24	EGLN3, GAS2, PLOD2	0.1807	WOTTON_RUNX_TARGETS_DN
0.0122806	3	24	ANKRD57, SEPT10, ACADL	0.1807	BURTON_ADIPOGENESIS_10
0.0122806	3	24	SGK1, PLOD2, C19orf76	0.1807	GRADE_COLON_CANCER_DN
0.0122806	3	24	COL24A1, UTS2R, PARVG	0.1807	MIKKELSEN_ES_ICP_WITH_H3K27ME3
0.0127948	4	37	DEK, SWAP70, GSTP1, CXCR5	0.185428	KLEIN_PRIMARY_EFFUSION_LYMPHOMA_DN
0.0127948	4	37	CYP2E1, G0S2, RARRES1, BHMT	0.185428	LEE_LIVER_CANCER_MYC_E2F1_DN
0.0127948	4	37	CYP2E1, GNG11, MYLK, TSHR	0.185428	NADLER_OBESITY_DN
0.0130501	7	82	PTGER3, HSPB6, GJA1, DCLK1, LUZP2, COL1A2, SPARC	0.188182	CROONQUIST_NRAS_VS_STROMAL_STIMULATION_DN
0.0131656	10	133	ZNF804A, DGKI, CRMP1, NOL4, ZNF643, SOX2, SCG3, BCAN, GRIA2, GRID2	0.188903	VERHAAK_GLIOBLASTOMA_PRONEURAL
0.0136835	19	305	FAM84A, FRZB, PCDH17, GRIA2, CLIC3, PTGER3, GPX3, PNOC, CD14, SCIN, SEMA6D, HDAC9, MARCH1, PCDH7, G0S2, LMO2, SOX2, CTTNBP2, HMCN1	0.193914	RIGGI_EWING_SARCOMA_PROGENITOR_UP
0.0138727	6	67	LAMC2, PDGFC, LEPR, LEFTY2, PCDH7, RARRES1	0.193914	KANG_IMMORTALIZED_BY_TERT_UP
0.0139751	7	83	GREM2, LSP1, AOX1, CXCL6, CDO1, HAS2, PDK4	0.193914	CHIARADONNA_NEOPLASTIC_TRANSFORMATION_CDC25_UP
0.0139751	7	83	DCHS1, HMCN1, HDAC9, LEPR, GREM2, PDK4, PRKD1	0.193914	HOELZEL_NF1_TARGETS_DN
0.0139751	7	83	GPX3, VSNL1, G0S2, AOX1, PCDH7, CALB1, GNG11	0.193914	AZARE_NEOPLASTIC_TRANSFORMATION_BY_STAT3_UP
0.0140204	5	52	PDK4, SYNM, RARRES1, MYLK, HOOK1	0.193914	TURASHVILI_BREAST_LOBULAR_CARCINOMA_VS_DUCTAL_NORMAL_DN
0.0141872	3	25	NECAB1, PDK4, ERG	0.193914	BERTUCCI_INVASIVE_CARCINOMA_DUCTAL_VS_LOBULAR_DN
0.0141872	3	25	GPNMB, CXCL2, STEAP4	0.193914	LIAN_LIPA_TARGETS_6M
0.0141872	3	25	PDE4B, HOXA5, IL2RA	0.193914	VALK_AML_WITH_FLT3_ITD
0.0141872	3	25	LSP1, SPINT2, CLIC3	0.193914	WINNEPENNINCKX_MELANOMA_METASTASIS_DN
0.0148278	2	14	COL1A2, C20orf103	0.194379	NAKAMURA_CANCER_MICROENVIRONMENT_UP
0.0148278	2	14	G0S2, SNCA	0.194379	HAHTOLA_MYCOSIS_FUNGOIDES_UP
0.0148278	2	14	GREM2, MLF1	0.194379	GAUSSMANN_MLL_AF4_FUSION_TARGETS_C_DN
0.0148278	2	14	LTF, ZIC1	0.194379	WONG_ENDMETRIUM_CANCER_UP
0.0148278	2	14	CNTNAP2, PKHD1L1	0.194379	HUI_MAPK14_TARGETS_UP
0.0148278	2	14	GULP1, ELF3	0.194379	SCHWAB_TARGETS_OF_BMYB_POLYMORPHIC_VARIANTS_DN
0.0148278	2	14	PDE1B, C10orf116	0.194379	WU_ALZHEIMER_DISEASE_DN
0.0148278	2	14	C20orf103, C3orf14	0.194379	VALK_AML_WITH_11Q23_REARRANGED
0.0148278	2	14	COL23A1, CD164L2	0.194379	MEISSNER_BRAIN_HCP_WITH_H3K4ME2
0.0149715	6	68	RBP1, CHKB, PDK4, CALB1, COL1A2, LAMA2	0.195375	KAYO_CALORIE_RESTRICTION_MUSCLE_UP
0.0153148	5	53	MLF1, SEMA6D, CYP2E1, NOVA1, TMEM108	0.198063	ACEVEDO_LIVER_CANCER_WITH_H3K9ME3_UP
0.0153148	5	53	RGS4, CRHBP, GPR4, LMO2, KCNA4	0.198063	LIN_NPAS4_TARGETS_DN
0.0158815	4	39	LOXL2, COL1A2, CHRNE, PCDHGA1	0.203145	WILCOX_RESPONSE_TO_PROGESTERONE_DN
0.015967	7	85	GPC6, LOXL2, COX6B2, SOX2, CD14, RGS4, CDO1	0.203145	PLASARI_TGFB1_SIGNALING_VIA_NFIC_1HR_DN
0.0160346	11	155	FLRT2, GNG11, MEOX2, LMO2, ESRRG, AOX1, LTF, CYR61, FAAH, SYNM, LAMA2	0.203145	DELYS_THYROID_CANCER_DN
0.0161309	6	69	ESRRG, EIF5A2, RAB37, GPC5, CYP27A1, P2RX5	0.203145	LEIN_PONS_MARKERS
0.0161309	6	69	CXCL6, CHRNE, SPINT2, ZIK1, CD14, SLC46A2	0.203145	LABBE_TARGETS_OF_TGFB1_AND_WNT3A_DN
0.0162713	3	26	RBP1, GSTP1, TSHR	0.203145	LOPES_METHYLATED_IN_COLON_CANCER_DN
0.0162713	3	26	GULP1, LEPR, RUNX1T1	0.203145	BONOME_OVARIAN_CANCER_POOR_SURVIVAL_UP
0.0162713	3	26	SPARC, HAS2, GJA1	0.203145	HOLLERN_SOLID_NODULAR_BREAST_TUMOR_DN
0.0166899	5	54	LTF, LAMA2, CYP2E1, RBP1, LEPR	0.206582	YAO_HOXA10_TARGETS_VIA_PROGESTERONE_UP
0.0166899	5	54	CTSL1, SLC2A14, PTPN7, LMO2, CXCL2	0.206582	ADDYA_ERYTHROID_DIFFERENTIATION_BY_HEMIN
0.0170364	7	86	RPS6KA2, RARRES1, PYROXD2, RBP1, LTF, SPARC, ERG	0.20997	TAKEDA_TARGETS_OF_NUP98_HOXA9_FUSION_16D_DN
0.0175958	4	40	GJA1, VAMP5, KCNN4, CTSL1	0.21412	CHIARADONNA_NEOPLASTIC_TRANSFORMATION_KRAS_CDC25_UP
0.0175958	4	40	EHHADH, PCDH7, PCDH10, HAS2	0.21412	KORKOLA_YOLK_SAC_TUMOR
0.0175958	4	40	RND3, GPNMB, ATOH1, CDCA7	0.21412	LEE_TARGETS_OF_PTCH1_AND_SUFU_UP
0.0177133	9	121	VSNL1, SIX3, RGS4, HDAC9, RPS6KA2, GNG11, RPH3A, ESRRG, CHGA	0.214644	CONCANNON_APOPTOSIS_BY_EPOXOMICIN_DN
0.018017	2	15	P2RX1, SEPT10	0.214714	HASLINGER_B_CLL_WITH_MUTATED_VH_GENES
0.018017	2	15	PTPN7, FRZB	0.214714	ZHAN_V1_LATE_DIFFERENTIATION_GENES_DN
0.018017	2	15	DEK, SEC31B	0.214714	CHIARETTI_T_ALL_RELAPSE_PROGNOSIS
0.018017	2	15	VIPR2, CPT1B	0.214714	STAMBOLSKY_BOUND_BY_MUTATED_TP53
0.0181477	5	55	EGLN3, SNCA, AP1M2, CTSL1, HAS2	0.215382	VANDESLUIS_COMMD1_TARGETS_GROUP_3_UP
0.0185376	3	27	CRHBP, ZNF217, ERG	0.218214	TONKS_TARGETS_OF_RUNX1_RUNX1T1_FUSION_SUSTAINDED_IN_ERYTHROCYTE_UP
0.0185376	3	27	CHGB, DNAJC6, RPH3A	0.218214	LEIN_LOCALIZED_TO_PROXIMAL_DENDRITES
0.018638	6	71	ENOSF1, PTPN7, LOXL2, SWAP70, SGK1, SEMA3C	0.218505	AMUNDSON_POOR_SURVIVAL_AFTER_GAMMA_RADIATION_8G
0.0194281	4	41	EGLN3, PLOD2, KCNN4, CTSL1	0.22593	BOYLAN_MULTIPLE_MYELOMA_C_DN
0.0194281	4	41	SPARC, COL1A2, LOXL2, ITGBL1	0.22593	ANASTASSIOU_MULTICANCER_INVASIVENESS_SIGNATURE
0.0205531	7	89	KCND2, COL23A1, RASL11B, COL24A1, NLGN1, PDGFC, EGLN3	0.233718	SCHAEFFER_PROSTATE_DEVELOPMENT_12HR_UP
0.0209749	13	199	RUNX1T1, NOL4, RGS4, CYR61, ZNF239, SETDB1, SLC6A15, PDE4B, DNAH9, MCC, ZNF217, CXCL6, NMNAT2	0.233718	BROWNE_HCMV_INFECTION_4HR_DN
0.0209859	11	161	GJA1, SGK1, ITGBL1, GPC6, HAS2, TACR1, MYLK, GULP1, KAAG1, AOX1, SPARC	0.233718	KONDO_EZH2_TARGETS
0.0209901	3	28	MAL2, MARVELD2, PCDH7	0.233718	AIGNER_ZEB1_TARGETS
0.0213813	4	42	LOXL2, SCG2, GULP1, GNG11	0.233718	CHARAFE_BREAST_CANCER_BASAL_VS_MESENCHYMAL_DN
0.0214065	6	73	CRYGD, CRHBP, VAMP5, MYLK, FAAH, GPX3	0.233718	DIAZ_CHRONIC_MEYLOGENOUS_LEUKEMIA_DN
0.0214788	8	107	PTGER3, HOXA5, COL24A1, SLC27A6, ERG, RAB27B, HOXA6, CRHBP	0.233718	TAKEDA_TARGETS_OF_NUP98_HOXA9_FUSION_3D_UP
0.0215565	2	16	TRIP6, CTSL1	0.233718	TOMIDA_METASTASIS_DN
0.0215565	2	16	CD14, RPL13A	0.233718	CAVARD_LIVER_CANCER_MALIGNANT_VS_BENIGN
0.0215565	2	16	TACR1, SGK1	0.233718	HERNANDEZ_MITOTIC_ARREST_BY_DOCETAXEL_1_UP
0.0215565	2	16	LAMC2, G0S2	0.233718	KANNAN_TP53_TARGETS_DN
0.0215565	2	16	PTPRCAP, ERG	0.233718	WANG_IMMORTALIZED_BY_HOXA9_AND_MEIS1_DN
0.0215565	2	16	CARTPT, RERG	0.233718	MA_PITUITARY_FETAL_VS_ADULT_DN
0.0215565	2	16	CXCL2, CXCL6	0.233718	GAURNIER_PSMD4_TARGETS
0.0215565	2	16	CXCL2, SEMA3C	0.233718	FERRARI_RESPONSE_TO_FENRETINIDE_UP
0.0215565	2	16	C1QTNF2, G0S2	0.233718	SEKI_INFLAMMATORY_RESPONSE_LPS_DN
0.0215565	2	16	TBR1, PTPN7	0.233718	HOFMANN_MYELODYSPLASTIC_SYNDROM_LOW_RISK_UP
0.0215565	2	16	P2RX5, PLOD2	0.233718	CHIANG_LIVER_CANCER_SUBCLASS_POLYSOMY7_DN
0.0230382	5	58	CLIC3, PRDM5, SLC6A15, SNCA, CYR61	0.248847	LEE_AGING_CEREBELLUM_DN

## Sheet: S5c. DCIS
pvalue	nhyper	ntotal	genes	padj	pathway
6.27753e-23	59	298	TF, HOXD13, SPAG6, CNTNAP5, MT1E, RARRES2, PLTP, NFAM1, PRSS50, LXN, IRF4, RSPO2, TCF21, CYYR1, UCN, SLC5A7, NECAB1, FBLIM1, ALX1, EPHA5, HSPB6, ECHDC1, AGTR1, PCDHGA3, ZIK1, SEC31B, FERD3L, TMPRSS12, ZNF454, AOX1, PAM, BCAT1, HKR1, AMT, HOXA7, ACOT12, KRT72, COL14A1, POU4F2, OTOF, TMEM204, PKP1, CIDEB, ADAM30, SOX1, NEFL, CCDC140, NAGS, PRLHR, GIPC2, POU2AF1, L1TD1, VWC2, PROM1, ZNF177, HAAO, PA…	1.76524e-19	HATADA_METHYLATED_IN_LUNG_CANCER_UP
3.87197e-22	105	852	TFAP2D, HOXD9, SIX6, HIST1H3I, FEZ1, PYY, CCDC140, SNAP91, HBA1, MYF6, GHSR, LAYN, TRH, PAX3, VIPR2, BTG4, FOXB1, MLNR, EMX2, SIM1, FOXD4L1, MT1M, IGFBP7, SSTR1, ADCY4, HOXB6, GFI1, SLC6A5, WNT2, CORO6, NAGS, RSPO2, MT1A, HOXB8, KCNK17, CLIP4, CH25H, NEUROD1, ITGA4, HTR1B, ADCY8, HOXB13, CYP26C1, SOX1, CXCL14, MAB21L2, POU4F2, HMX2, WT1, SPAG6, SLFN11, DSC3, EPHA5, HOXD8, TMEFF2, QRFPR, VSX1, SLI…	5.44398e-19	BENPORATH_EED_TARGETS
2.62167e-21	101	819	WNT2, SLC6A5, PHYHIPL, SLC30A10, KCNIP4, PKP1, FOXB1, CDH6, TTYH1, PRLHR, SLFN11, CLEC4G, FOXD4L1, HBA1, CH25H, EMX2, ADCY8, GHSR, FOXG1, MT1A, ADCY4, GRIN2B, COL25A1, IGF2, GFI1, SLC18A3, HS3ST2, ADARB2, MAB21L2, DPP6, STMN2, RASGRF2, SPAG6, SOX10, ZIC1, CCDC140, CLEC14A, TLX2, NPHS2, QRFPR, NEUROD1, TMEFF2, NEFL, HOXD13, SOX1, HMX2, HPSE2, VSX1, LHX8, CDX2, PAX9, HOXC4, MSC, WT1, PAX3, LAYN, CY…	2.45738e-18	BENPORATH_SUZ12_TARGETS
5.13184e-19	103	907	OTP, WNT2, PRLHR, FOXB1, OXCT2, SRRM4, TMEFF2, HOXD8, NEUROD1, LHX8, FOXD4L1, ADC, PYY, DSC3, CORO6, SLC6A5, KCNIP4, IRF4, DDX25, HS3ST2, RIPPLY2, TTYH1, RSPO2, HOXB13, PAX3, GCM2, CDH6, MAB21L2, HBA1, BARHL2, EPHA5, ADCY8, CXCL14, POU4F2, SIM1, TLX2, SPAG6, CLEC14A, SLFN11, NEFL, HOXC8, PKP1, FOXG1, UCN, MSC, NAGS, TCF21, TFAP2D, HPSE2, ADARB2, FOXE3, HOXB8, ITGA4, SRD5A2, CLIP4, SIX3, HOXD13, Z…	3.60768e-16	BENPORATH_ES_WITH_H3K27ME3
5.87785e-17	71	533	SLC10A4, RSPO2, HOXC8, CCDC140, HOXD13, CH25H, OTP, NEFL, SRD5A2, FOXB1, TLX2, MT1M, WT1, MT1A, NAGS, ZIC1, CDX2, ADCY4, MYF6, ADCY8, FOXD4L1, DSC3, SLFN11, HMX2, HOXB13, PKP1, FEZ1, ADARB2, PAX9, OXCT2, PRLHR, GHSR, TRH, HBA1, UCN, TMEFF2, CORO6, COL25A1, SPAG6, LAYN, MAB21L2, MSC, LHX8, SIX6, NEUROD1, HOXD8, PTGDR, STMN2, PAX3, SLITRK3, ITGA4, CLEC14A, HPSE2, SLC6A5, SIX3, SSTR1, HOXC4, POU4F2,…	3.3057e-14	BENPORATH_PRC2_TARGETS
2.566e-16	66	485	FOXG1, SLC7A14, AQP3, OXT, GHSR, LHFPL5, ALOX12, BOLL, BCAN, HS3ST2, MOS, PROM2, PYY, SLC5A5, KRT83, CLDN4, SOX1, CDH8, PAQR6, SIX3, TFAP2D, DNAJC6, ACTN2, PRSS50, OTP, VWC2, NRTN, KCNS1, QRFPR, TCF21, NAGS, DPYS, VSX1, SIX6, UCN, CCKBR, CARTPT, NPHS2, FOXB1, ALX1, TTYH1, SLC34A2, BHMT2, CA4, C1QL2, DLEU7, FERD3L, PTGDR, TRH, CDX2, NEUROD1, POU4F2, VSTM2A, SRRM4, RYR2, GALR1, GFRA3, SLC6A5, SLITR…	1.2026e-13	MIKKELSEN_MEF_HCP_WITH_H3K27ME3
1.36054e-15	43	238	HOXB6, PITX2, KRT83, AEBP1, GFI1, LHX8, CDX2, ALX1, PYY, HOXC4, SIM1, NAGS, OTP, WT1, SLC18A3, PROM2, HMX2, ANKRD53, HOXD9, IGF2, KRT7, HOXD8, HOXC8, PRSS50, CLDN4, HOXA4, WDR86, IGF2BP3, DMGDH, SLC5A5, FOXE3, NPY, BARHL2, HOXA5, MIXL1, IGF2BP1, PKP1, SIX6, GFRA3, TLX2, HOXD13, POU4F2, FOXB1	5.46547e-13	MEISSNER_BRAIN_HCP_WITH_H3K27ME3
2.37971e-10	40	297	MIXL1, EVX2, ALX1, SIX6, FOXE3, PYY, PTPRN, UCN, GHSR, OTP, RYR2, HOXB8, POU4F2, GALNT13, CDX2, SIM1, CDH8, STMN2, GALR3, SLC6A5, HOXD9, PAX3, C1QL2, IGF2BP1, IGF2, CCKBR, VSX1, FOXG1, STAC2, TFAP2D, GRIN2B, COL14A1, MSC, LHX8, GFI1, CXCL14, SLC6A17, HOXC8, SLC7A14, CARTPT	8.3647e-08	MIKKELSEN_NPC_HCP_WITH_H3K27ME3
3.77714e-09	49	445	CA4, CYP26C1, DMRTA2, TLX2, ELF3, SLC7A4, EMX2, NAPRT1, ISLR, CCDC8, ANKRD33, CLEC14A, RNF186, AIPL1, CXCL14, G0S2, TRH, SSTR1, HTR1B, CALML3, SLC6A17, LEP, MLNR, ACVRL1, LCN8, ASCL4, NHLRC1, BARHL2, RARRES2, TMEM155, PCDHA7, CD248, AIRE, BCAN, KRT83, ARSI, KRT72, COX7A1, PRSS50, ITPRIPL1, PROM2, CYP4F8, PDLIM4, SLC2A5, TMEM74, MT1G, UCN, SIX6, PLA2G3	1.18015e-06	MARTENS_TRETINOIN_RESPONSE_UP
8.23768e-09	46	414	CDO1, PLCD1, LHFPL5, SLC5A5, OXT, CA4, SSTR1, CYBA, SMC1B, PKP1, DPP6, KRT7, SEC31B, LTB4R2, ITGA4, GALR1, BCAT1, NAGS, PROM2, SLC34A2, ALOX12, ANKRD53, NAPRT1, DKK3, SPAG6, HS3ST2, WDR86, CLDN4, CORIN, ARSI, L3MBTL4, PRSS50, TSPAN2, CLDN11, AQP3, GIPC2, KRT83, TRIM58, GFRA3, WT1, GPR83, PRLHR, GYPC, RASGRF2, DMGDH, SLC26A8	2.31644e-06	MEISSNER_NPC_HCP_WITH_H3_UNMETHYLATED
1.32204e-08	69	759	OXCT2, OR2L13, SLC2A5, ANKRD45, SLC30A10, SPAG6, PHYHIPL, HMX2, CCKBR, DDX25, GAL3ST3, CD248, GPR83, POU2AF1, LAYN, TSPAN11, DNAH10, ACRBP, KCNJ8, FAIM2, FOXG1, CES1, CDH8, ZPBP2, UTS2R, SOX15, STAC2, C19orf55, AURKC, ZIK1, CLEC4G, CYP2A6, CKM, ANKRD53, TLX2, FOXD4L1, HOXD13, UCN, ZSWIM2, HSPA12B, ADRA1D, NFAM1, IRAK2, CAND2, ZNF662, SYNPR, AGTR1, PRSS50, NPFFR2, PCDH10, PDLIM4, PCDHB15, GABRA1, …	3.37961e-06	ZWANG_TRANSIENTLY_UP_BY_2ND_EGF_PULSE_ONLY
1.35708e-07	32	262	CH25H, MFGE8, ZIC1, PROM1, PRKCB, COL14A1, EFEMP1, DSC3, SOX10, HOXA5, IGF2BP3, DNM3, AQP1, MT1M, KRT7, MEOX2, PKP1, MME, TTYH1, KRT5, PDPN, KCNN4, SLC34A2, ELN, CYBA, LEPR, COL4A2, FABP5, POU2AF1, HSPB2, PLTP, CRYAB	3.1801e-05	SMID_BREAST_CANCER_LUMINAL_B_DN
2.26911e-07	15	75	SLITRK3, HOXB6, HPSE2, IGF2, PYY, TFAP2D, KCNS1, SIX3, ELOVL3, OTP, EVX2, TBX4, GFI1, HOXB8, HOXC8	4.90826e-05	MIKKELSEN_IPS_WITH_HCP_H3K27ME3
3.10596e-07	20	127	C2orf40, GFRA3, GPNMB, GREM2, BEST4, PRKCB, KCNIP4, NPY, CA4, TM6SF2, ANPEP, MEOX2, EFEMP1, NEUROD1, SOX10, MT1M, VSTM2A, PYY, CPNE8, RSPO2	6.23854e-05	SABATES_COLORECTAL_ADENOMA_DN
3.73352e-07	17	97	SYNPR, ADAM32, LTB4R, DPP6, TM6SF2, SOX15, ACRBP, L1TD1, NECAB1, PCDHB14, PCDHA7, SPAG6, CNTNAP2, SLC26A8, SLC2A5, GIGYF1, PCDHA5	6.99911e-05	MIKKELSEN_MEF_HCP_WITH_H3_UNMETHYLATED
6.46089e-07	26	203	LEPR, TF, PRKCB, GJA4, HOXA5, ITGA4, MEOX2, MME, ACVRL1, NPR2, KRT5, GNG11, CDO1, CRYAB, EFEMP1, MT1M, CES1, AQP1, SYNE1, COL14A1, LAMA2, HOXA7, CH25H, POU2AF1, HSPB2, PLTP	0.00011355	SMID_BREAST_CANCER_NORMAL_LIKE_UP
1.36179e-06	15	85	PTH2R, TNFRSF8, CLEC14A, GPNMB, ISLR, HSPA12B, NCAN, FGF10, ALOX15B, TSPAN11, MARCH1, HOXB13, ADARB2, PDE1C, DSC3	0.000225255	MIKKELSEN_ES_ICP_WITH_H3K4ME3_AND_H3K27ME3
1.52873e-06	24	187	POU2AF1, RIBC2, ELF3, C11orf88, TCTEX1D1, CAPS, AQP3, CCDC17, C10orf107, PROM1, CR1, SPAG6, CES1, KRT7, C2orf40, CCDC65, SLC16A5, ALDH1L1, KLHDC9, DNAH10, CCDC11, MT1E, FAM3B, C5orf49	0.000230187	SENGUPTA_NASOPHARYNGEAL_CARCINOMA_DN
1.55532e-06	14	76	CCKBR, PYY, SIX6, GFI1, IGF2BP1, CARTPT, MIXL1, HOXB6, OTP, HOXD9, SLC7A14, HOXC8, ALX1, CDX2	0.000230187	MEISSNER_NPC_HCP_WITH_H3K27ME3
2.09928e-06	10	42	TFAP2D, COL14A1, IGF2BP1, ZIC1, GABRA1, GAS2, ZPBP2, CHRM2, ERG, ASCL4	0.000295158	KONDO_PROSTATE_CANCER_WITH_H3K27ME3
2.76309e-06	36	355	NEUROD1, MIXL1, FOXE3, GFRA3, SLC18A3, QRFPR, SSTR1, SLC30A10, AEBP1, SLC34A2, WDR86, CXCL14, HS3ST2, KRT7, BCAN, SLITRK3, PRLHR, AIRE, ACVRL1, SLC6A5, HOXD9, CARTPT, ALOX12, PHYHIPL, PYY, ELOVL3, C1QL2, PROM2, ZIC1, VSX1, HOXD8, EVX2, NPHS2, TRIM58, CCKBR, SLC6A17	0.00036999	MIKKELSEN_MCV6_HCP_WITH_H3K27ME3
3.4943e-06	7	22	DSC3, FABP5, PDPN, PKP1, CXCL14, FEZ1, AQP3	0.000446635	HUPER_BREAST_BASAL_VS_LUMINAL_UP
4.22761e-06	23	185	RSPO2, AVPR1A, HOXC8, FGF10, PCDHB13, IGF2BP3, PAX9, FOXS1, COL14A1, TBX15, CYBA, PITX2, CDO1, CLIP4, ALX1, DKK3, PDK4, MME, G0S2, ISLR, HOXB6, ENPEP, PAX3	0.000516871	WANG_MLL_TARGETS
7.68139e-06	20	154	BHMT2, AEBP1, ITGA8, MXRA8, LAMA2, EFEMP1, ISLR, COL14A1, CES1, AOX1, PLTP, BICC1, FEZ1, MME, CDO1, GPNMB, CRYAB, MSC, CXCL14, ANPEP	0.000900002	BOQUEST_STEM_CELL_UP
8.22392e-06	15	97	SERPINB9, GYPC, NEFL, CDH6, STMN2, COL14A1, SOX10, IGFBP7, TMEM204, ITGA4, PITX2, MDFI, L1TD1, TAGLN3, PAX3	0.000925026	LEE_NEURAL_CREST_STEM_CELL_UP
1.04233e-05	14	88	CES1, GPT, CYP4F2, CDO1, CYP2A6, AGTR1, DPYS, LCAT, HSD17B4, AOX1, CYP2E1, TF, RARRES2, PON3	0.00112732	HSIAO_LIVER_SPECIFIC_GENES
1.28677e-05	32	321	ITGA8, FEZ1, AEBP1, C2orf40, KCNJ8, NID1, NPR2, COL14A1, KRT5, AKR1B1, LCAT, HOXD13, KRT7, PDLIM4, COL4A2, CYP4F8, ECHDC1, MME, ADCY4, RARRES2, DKK3, CLIP4, GYPC, AQP3, EFEMP1, DSC3, LAYN, COL4A1, CRYAB, PDK4, CD248, SRD5A2	0.00134014	LIU_PROSTATE_CANCER_DN
1.64114e-05	8	34	FABP5, CBR1, C10orf107, RARRES2, PDPN, TCTEX1D1, CA3, G0S2	0.00164817	NOUSHMEHR_GBM_SILENCED_BY_METHYLATION
1.71196e-05	33	340	C2orf40, KRT5, PDPN, DKK3, CXCL14, CPNE8, MME, AEBP1, COL4A2, COL14A1, GYPC, COL4A1, STAC2, GNG11, JAM3, FABP5, HAS2, TMEM204, VIM, EPDR1, CLIP3, RARRES2, CALML3, PKP1, CRYAB, LEP, ARSI, PDLIM4, GRASP, CPXM1, HSPB2, LCAT, FEZ1	0.00166001	LIM_MAMMARY_STEM_CELL_UP
2.54195e-05	60	777	KRT5, BCAN, AQP3, GHSR, NLGN1, PDE4B, LEP, HOXC4, NPY, CXCL14, HSPB2, GNG11, VIM, KCNJ8, SLC18A3, CYBA, CYP2E1, EPO, FOXG1, UTS2R, ADRA1D, SNAP91, KCNAB3, FEZ1, CDO1, EFEMP1, DPYS, CYP4F2, KCNS1, HSPB6, CA3, AQP7, KRT8, TF, NEFL, FGF10, BARHL2, OXT, GPT, LEPR, CARTPT, LHCGR, SOX10, CNGA3, HSD17B4, SSTR1, GFI1, GALR3, PYY, NCAN, PTPRN, DPP6, CDH8, IGF2, P2RY6, HOXA4, TRH, HAAO, PRKCB, UCN	0.00238266	YOSHIMURA_MAPK8_TARGETS_UP
2.65752e-05	7	28	IGF2BP3, CYP2E1, FAM3B, ALOX12, PAX9, CES1, ALOX15B	0.00241063	RICKMAN_HEAD_AND_NECK_CANCER_E
2.81592e-05	6	21	PCDHB15, PCDHB14, HOXD8, KCNS1, ELOVL3, SLITRK3	0.00247449	MIKKELSEN_ES_HCP_WITH_H3K27ME3
3.52315e-05	7	29	PDPN, KCNJ8, NPFFR2, EPHA5, GRIN2B, GAS2, SLC6A5	0.00291386	ROVERSI_GLIOMA_LOH_REGIONS
3.52315e-05	7	29	AURKC, ADAM30, ACRBP, BOLL, PRSS50, SPACA1, ZPBP2	0.00291386	WEBER_METHYLATED_HCP_IN_FIBROBLAST_DN
4.03309e-05	30	310	ZIK1, LAMA2, FOXS1, CNKSR1, LHCGR, RNF186, HSPB6, FAM83E, AKR1E2, ZNF454, AOX1, CYYR1, KRT72, PON3, KATNAL2, CA3, SIPA1, ALDH1L1, GNG11, NRN1L, G0S2, FAIM2, PUS3, CCDC65, SV2A, ELF3, MRGPRE, NPFFR2, ELMO3, SPHKAP	0.0032403	MIKKELSEN_ES_ICP_WITH_H3K4ME3
4.19151e-05	21	185	TMEM204, BICC1, MME, COL4A1, MXRA8, PAM, JAM3, COL4A2, ISLR, RARRES2, COL14A1, GPNMB, SGK1, DNM3, NID1, IGFBP7, AEBP1, ERG, CH25H, AKR1B1, ENPEP	0.00327403	SCHUETZ_BREAST_CANCER_DUCTAL_INVASIVE_UP
5.03786e-05	5	16	GFI1, ANPEP, LHCGR, AQP7, ALX1	0.00382877	KIM_ALL_DISORDERS_CALB1_CORR_DN
5.39575e-05	8	39	DAB1, COL4A2, LEPR, COL4A1, PLTP, PDK4, GIPC2, MFGE8	0.0039494	LEE_LIVER_CANCER_CIPROFIBRATE_UP
5.47747e-05	6	23	ALDH1L1, ELN, TF, NECAB1, PDK4, ERG	0.0039494	BERTUCCI_INVASIVE_CARCINOMA_DUCTAL_VS_LOBULAR_DN
7.42798e-05	6	24	DNAJC6, NEUROD1, AURKC, CA4, SNAP91, SYCE1	0.00502324	MADAN_DPPA4_TARGETS
7.48389e-05	5	17	SPAG6, ZPBP2, ACRBP, AURKC, ADAM30	0.00502324	WEBER_METHYLATED_HCP_IN_SPERM_DN
7.50271e-05	4	11	NEUROD1, RGS7, ALOX15B, PROM1	0.00502324	SETLUR_PROSTATE_CANCER_TMPRSS2_ERG_FUSION_DN
0.000107909	5	18	GPT, MXRA8, TCAP, AEBP1, HOXA7	0.00689639	SCHLINGEMANN_SKIN_CARCINOGENESIS_TPA_DN
0.000107909	5	18	CIDEB, CYP2E1, LCAT, ACADS, DMGDH	0.00689639	LEE_LIVER_CANCER
0.000114349	11	73	ALDH1L1, NAGS, CDO1, PDK4, KCNJ8, BHMT2, AOX1, CYP4F2, CIDEB, HAAO, GPT	0.00714557	CHIANG_LIVER_CANCER_SUBCLASS_PROLIFERATION_DN
0.000133541	15	121	FABP5, FGF2, DKK3, AQP3, MT1E, COL4A2, GNG11, COL4A1, CLDN4, IGFBP7, MT1G, KRT7, VIM, BICC1, EFEMP1	0.00816344	WU_CELL_MIGRATION
0.000168036	22	217	GABRA1, AEBP1, SLC5A5, COL4A1, MME, KRT83, CRYAB, HOXB13, CYBA, COL14A1, PAM, ZNF132, CD8B, ITGA8, HTR1B, CR1, DPP6, PTPRN, CES1, GPNMB, FEZ1, CYP2A6	0.00996836	TARTE_PLASMA_CELL_VS_PLASMABLAST_UP
0.000170157	11	76	AEBP1, COL4A2, COL4A1, GYPC, STAC2, FABP5, SOX10, CRYAB, VIM, TSPAN2, NRTN	0.00996836	LIM_MAMMARY_LUMINAL_MATURE_DN
0.000186782	7	36	MSC, UPK3A, LHCGR, CDX2, ALX1, MME, PYY	0.010719	KIM_BIPOLAR_DISORDER_OLIGODENDROCYTE_DENSITY_CORR_DN
0.000214026	25	264	COX7A1, ACVRL1, CDO1, RARRES2, HOXA5, EPHA5, G0S2, PAM, ADCY8, LEPR, CYP2E1, CA3, PKIA, CXCL14, GNG11, TCF21, PROM1, GREM2, LOR, MEOX2, LAMA2, AQP1, STMN2, PLTP, NID1	0.0120368	SWEET_LUNG_CANCER_KRAS_DN
0.000233375	13	102	LXN, TBX15, PLTP, SERPINB9, COLEC11, EFEMP1, POU2AF1, KCNT2, GPNMB, GLT1D1, ISLR, CYBA, AEBP1	0.0128677	CHIANG_LIVER_CANCER_SUBCLASS_CTNNB1_DN
0.000249748	8	47	DPP6, NID1, WT1, CD248, MME, COL14A1, COX7A1, EFEMP1	0.0135056	WONG_ENDMETRIUM_CANCER_DN
0.000255909	17	154	CORIN, BHMT2, CLEC4G, EFEMP1, HAAO, PTPRO, CA3, DPYS, CRYAB, GAS2, DMGDH, SLC2A5, EPDR1, ENPEP, GABRA1, TTYH1, TCF21	0.0135777	SHETH_LIVER_CANCER_VS_TXNIP_LOSS_PAM4
0.000280227	5	21	IRF4, PROM1, POU2AF1, GYPC, ANPEP	0.0142888	KLEIN_TARGETS_OF_BCR_ABL1_FUSION
0.000280227	5	21	MT1G, DLEC1, TMEFF2, MT1A, ITGA4	0.0142888	LOPES_METHYLATED_IN_COLON_CANCER_UP
0.000289639	4	14	MT1A, AQP1, CDO1, LXN	0.0142888	BERENJENO_TRANSFORMED_BY_RHOA_FOREVER_UP
0.000289639	4	14	PRSS3, CLDN4, PDLIM4, CRYAB	0.0142888	DAZARD_UV_RESPONSE_CLUSTER_G24
0.000336201	7	39	COL14A1, LEPR, LAMA2, G0S2, CXCL14, LEP, HOXB6	0.0162999	SMID_BREAST_CANCER_LUMINAL_A_UP
0.000363467	16	145	DPP6, SYNE1, RYR2, FEZ1, CA4, GNG11, MEOX2, FABP5, PROM1, MT1G, AOX1, CRYAB, IGF2, MT1E, HBA1, LAMA2	0.0173232	DELYS_THYROID_CANCER_DN
0.000403547	7	40	GPNMB, NID1, LEP, MME, AGTR1, KRT7, PITX2	0.0189129	LIU_VAV3_PROSTATE_CARCINOGENESIS_UP
0.000418079	4	15	TCF21, EVX2, AIRE, HOXA4	0.0189619	RIZ_ERYTHROID_DIFFERENTIATION_APOBEC2
0.000418079	4	15	COX7A1, KRT7, KRT8, AQP1	0.0189619	LIANG_SILENCED_BY_METHYLATION_UP
0.000549417	8	52	CA3, LAMA2, RARRES2, CYP2E1, AQP1, PDPN, ELN, LEPR	0.02414	YAO_HOXA10_TARGETS_VIA_PROGESTERONE_UP
0.000549417	8	52	C2orf40, CNTNAP2, KCNN4, MRPS21, COX7A1, QRFP, P2RX6, AMT	0.02414	MIKKELSEN_IPS_LCP_WITH_H3K4ME3
0.000585216	4	16	CRYAB, HSD17B1, GNG11, PRSS3	0.0253173	DORSEY_GAB2_TARGETS
0.000617701	5	24	PKIA, CMYA5, CKM, PDK4, ACTN2	0.025925	RICKMAN_HEAD_AND_NECK_CANCER_F
0.000617701	5	24	TSPAN11, PDPN, NID1, HAS2, AQP1	0.025925	HOLLERN_SOLID_NODULAR_BREAST_TUMOR_DN
0.000640299	17	166	GREM2, TMEFF2, LEPR, C2orf40, VSTM2A, DNAJC6, FAM3B, MT1M, DAB1, AGTR1, LAMA2, PDK4, POU2AF1, SSTR1, MAGI2, MT1E, EFEMP1	0.0264783	VECCHI_GASTRIC_CANCER_EARLY_DN
0.000732378	18	182	KRT5, SOX10, DSC3, POU2AF1, KCNN4, IGF2BP3, KRT83, CLIP4, CYBA, ELN, ZIC1, PKP1, TTYH1, MFGE8, CRYAB, COL4A2, PDPN, SIX3	0.0293036	SMID_BREAST_CANCER_RELAPSE_IN_BONE_DN
0.000751964	3	10	FAM135B, ELF3, ZNF572	0.0293036	HATADA_METHYLATED_IN_LUNG_CANCER_DN
0.000751964	3	10	HOXA4, HOXA5, HOXA7	0.0293036	NIKOLSKY_BREAST_CANCER_7P15_AMPLICON
0.000751964	3	10	SLC34A2, TRIM59, ITGA8	0.0293036	TUOMISTO_TUMOR_SUPPRESSION_BY_COL13A1_UP
0.000760727	10	77	PDPN, GREM2, AOX1, LXN, CXCL6, CDO1, NID1, HAS2, IGF2, PDK4	0.0293036	CHIARADONNA_NEOPLASTIC_TRANSFORMATION_CDC25_UP
0.00078147	5	25	NCAN, BCAN, EMX2, MT1A, MFGE8	0.0295213	LEIN_ASTROCYTE_MARKERS
0.000790921	7	44	CBR1, GIPC2, AKR1B1, IGF2, ELF3, MFGE8, KRT8	0.0295213	LEE_LIVER_CANCER_MYC_TGFA_UP
0.000797873	4	17	TXNRD1, MT1M, MT1E, MT1G	0.0295213	ZHENG_RESPONSE_TO_ARSENITE_UP
0.000849653	10	78	CLEC14A, FGF10, MRGPRE, FOXS1, PTH2R, HOXB13, ADARB2, ISLR, TNFRSF8, ALOX15B	0.0310289	MIKKELSEN_IPS_ICP_WITH_H3K4ME3_AND_H327ME3
0.0010409	9	68	ANPEP, TF, DNAJC6, PDPN, PROM1, KRT7, PDK4, PRKCB, CXCL6	0.0368726	SENGUPTA_NASOPHARYNGEAL_CARCINOMA_WITH_LMP1_DN
0.00104901	12	105	TF, CRYAB, ELF3, CMYA5, PER1, KRT7, CYP4X1, ANPEP, DSC3, CLDN11, KRT5, C2orf40	0.0368726	TURASHVILI_BREAST_DUCTAL_CARCINOMA_VS_DUCTAL_NORMAL_DN
0.00104901	12	105	PCDHGB7, EXOSC2, CYP26C1, MOS, DNM3, HKR1, KCNAB3, PCDHB14, GPR149, LHCGR, KRTCAP3, ZNF662	0.0368726	FIGUEROA_AML_METHYLATION_CLUSTER_3_UP
0.00106324	4	18	PLTP, MME, EFEMP1, GPNMB	0.0369116	NAKAYAMA_SOFT_TISSUE_TUMORS_PCA1_UP
0.00110797	6	36	ELN, EFEMP1, PDE4B, AQP7, GJA4, KRT7	0.0375374	WESTON_VEGFA_TARGETS_3HR
0.00110797	6	36	CYP4X1, PCDHB14, GIGYF1, PCDHB15, PCDHA7, KIAA1755	0.0375374	MIKKELSEN_IPS_HCP_WITH_H3_UNMETHYLATED
0.00120765	5	27	STMN2, COX7A1, HSPB2, MFGE8, CRYAB	0.039952	COWLING_MYCN_TARGETS
0.00120765	5	27	HBA1, ADARB2, EFEMP1, GPNMB, SGK1	0.039952	DEMAGALHAES_AGING_UP
0.00125175	12	107	TBX4, HOXD13, LAYN, CLIP4, WNT2, LAMA2, AEBP1, STMN2, FGF10, CXCL6, SGK1, AVPR1A	0.0409295	KATSANOU_ELAVL1_TARGETS_DN
0.00138883	4	19	AIRE, LEPR, NPR2, LEP	0.0448894	MATZUK_CENTRAL_FOR_FEMALE_FERTILITY
0.00144662	13	122	HOXD8, ACTN2, FAM3B, CXCL14, MT1A, TSPAN2, PDLIM4, COX7A1, SRD5A2, CD200, FABP5, BOLL, CNTNAP2	0.0461791	FOSTER_KDM1A_TARGETS_UP
0.00147799	5	28	DOK5, BICC1, CAND2, HAS2, FABP5	0.0461791	DACOSTA_ERCC3_ALLELE_XPCS_VS_TTD_DN
0.00147799	5	28	IGF2, MEOX2, EFEMP1, ABCC10, G0S2	0.0461791	LEE_LIVER_CANCER_MYC_DN
0.00154676	6	38	PROM2, PROM1, DAB1, NID1, FABP5, AEBP1	0.0477967	SHETH_LIVER_CANCER_VS_TXNIP_LOSS_PAM3
0.0016463	3	12	PDE4B, SLC2A5, PTPRO	0.0503196	SPIELMAN_LYMPHOBLAST_EUROPEAN_VS_ASIAN_2FC_DN
0.0016703	18	195	CA3, ZIK1, AOX1, ADAMTS12, MRGPRE, ZSWIM2, ZNF454, SIPA1, AKR1E2, PCDHB13, NCAN, G0S2, TSPAN11, PDE4B, PUS3, KATNAL2, PDE1C, HSPB6	0.050504	MIKKELSEN_NPC_ICP_WITH_H3K4ME3
0.00178237	4	20	UPK3A, C11orf88, UTS2R, LEP	0.0533193	MIKKELSEN_ES_ICP_WITH_H3K27ME3
0.00181114	9	73	PRSS3, G0S2, AOX1, FEZ1, PLTP, PDPN, CALML3, GNG11, NEFL	0.0536097	AZARE_NEOPLASTIC_TRANSFORMATION_BY_STAT3_UP
0.00190514	12	112	ALDH1L1, ACTN2, FAM3B, CYP2E1, PDK4, MME, PHYHIPL, NAGS, AOX1, SRD5A2, KCNJ8, CORIN	0.0558047	CHIANG_LIVER_CANCER_SUBCLASS_CTNNB1_UP
0.00211025	6	40	MFGE8, CBR1, SGK1, COL4A2, KRT8, GIPC2	0.0611754	LEE_LIVER_CANCER_ACOX1_UP
0.00214226	7	51	NEFL, GRIA4, GRIN2B, RYR2, FAIM2, DPP6, PTPRN	0.0611888	LEIN_NEURON_MARKERS
0.00215423	5	30	ZIC1, IGF2BP3, CRYAB, TTYH1, KRT5	0.0611888	DOANE_BREAST_CANCER_ESR1_DN
0.00225178	4	21	FABP5, PLIN4, HSD17B4, AQP7	0.0626933	RUAN_RESPONSE_TO_TROGLITAZONE_UP
0.00225178	4	21	PDE4B, HOXA5, HOXA4, HOXB6	0.0626933	VALK_AML_WITH_FLT3_ITD
0.00229199	3	13	PDPN, TLX2, SLC16A5	0.0631871	SU_PLACENTA
0.0024455	23	279	TOX2, C2orf40, SLFN11, PRKCB, PKP1, FBLIM1, CORIN, TMEFF2, CYYR1, WT1, TSPAN11, HSPB2, MARCH1, G0S2, AQP3, ITGA4, SYNPR, CES1, CRYAB, RARRES2, ENPEP, DAB1, SERPINB9	0.0667644	RIGGI_EWING_SARCOMA_PROGENITOR_UP
0.00250612	11	102	KCNIP4, CYBA, DNM3, PTPRO, NEFL, AEBP1, STMN2, EPHA5, DKK3, EFEMP1, VIM	0.0677615	SERVITJA_ISLET_HNF1A_TARGETS_UP
0.00256896	5	31	LXN, NID1, CXCL6, CDO1, PDK4	0.0687992	CHIARADONNA_NEOPLASTIC_TRANSFORMATION_KRAS_CDC25_DN
0.00304085	5	32	EXOSC2, DNM3, PCDHGB7, CYP26C1, MOS	0.080038	FIGUEROA_AML_METHYLATION_CLUSTER_2_UP
0.00306973	24	300	LHX8, STAC2, SLC30A10, CDH8, VSX1, PAX3, GHSR, RYR2, GALNT13, GALR3, SIM1, C1QL2, FOXE3, IGF2, HOXD13, SLC6A17, TLX2, UCN, SLC18A3, POU4F2, HMX2, MSC, CXCL14, FOXG1	0.080038	MEISSNER_NPC_HCP_WITH_H3K4ME2_AND_H3K27ME3
0.00309293	3	14	IGF2, LAMA2, MYF6	0.080038	SUZUKI_RESPONSE_TO_TSA_AND_DECITABINE_1B
0.00310247	7	54	HOXA5, PROM1, FEZ1, IGFBP7, HOXA4, CES1, HOXA7	0.080038	ROSS_LEUKEMIA_WITH_MLL_FUSIONS
0.00345048	4	23	DKK3, SOX10, GALNT13, TF	0.0866316	COLIN_PILOCYTIC_ASTROCYTOMA_VS_GLIOBLASTOMA_UP
0.00345048	4	23	AEBP1, SLC34A2, GPNMB, G0S2	0.0866316	YAMASHITA_METHYLATED_IN_PROSTATE_CANCER
0.00345048	4	23	STMN2, EMX2, CXCL14, PROM2	0.0866316	WINNEPENNINCKX_MELANOMA_METASTASIS_DN
0.00357456	5	33	KRT5, CRYAB, ELF3, C2orf40, PROM1	0.0881725	TURASHVILI_BREAST_DUCTAL_CARCINOMA_VS_LOBULAR_NORMAL_DN
0.00357456	5	33	CES1, CA4, PDK4, G0S2, AQP7	0.0881725	NAKAYAMA_SOFT_TISSUE_TUMORS_PCA2_DN
0.00361194	27	353	IRF4, LAMA2, RARRES2, TCF21, DKK3, ISLR, PLTP, CDH6, CD248, AOX1, ITGA8, MT1E, AMT, TMEM204, COLEC11, HOXA5, COX7A1, GPT, CYP2A6, AKR1B1, AGTR1, JAM3, MT1G, AEBP1, ALDH1L1, LEPR, G0S2	0.0883198	WEST_ADRENOCORTICAL_TUMOR_DN
0.00370082	6	44	TF, LEP, CYP2E1, CA3, PLIN4, FAM3B	0.0894217	CADWELL_ATG16L1_TARGETS_UP
0.00372061	17	194	DKK3, SIPA1, CR1, SV2A, PDLIM4, SLC2A5, PLTP, TCF21, MT1E, MXRA8, MSC, KCNN4, AEBP1, PRSS3, MT1G, IGF2BP3, EFEMP1	0.0894217	OISHI_CHOLANGIOMA_STEM_CELL_LIKE_DN
0.00400252	30	406	VIPR2, NPY, GLT1D1, NRTN, HTR1B, KCNJ8, ACOT12, COL25A1, CH25H, NPR2, KIAA1755, KCNH4, BOLL, WNT2, CD248, CCDC17, DNAJC15, SRRM4, AEBP1, HOXD8, SLC16A12, DPP6, DLEU7, FBXL21, DNAJC6, ADRA1D, SNX32, FGF2, AVPR1A, CPXM1	0.0952708	MEISSNER_NPC_HCP_WITH_H3K4ME2
0.00406561	3	15	KRT8, CYBA, COL4A2	0.0952708	WANG_BARRETTS_ESOPHAGUS_AND_ESOPHAGUS_CANCER_UP
0.00406561	3	15	PCDHA7, VIPR2, C2orf40	0.0952708	STAMBOLSKY_BOUND_BY_MUTATED_TP53
0.00415887	19	227	SLFN11, MT1G, PDPN, EFEMP1, DKK3, AEBP1, JAM3, GNG11, RARRES2, IGFBP7, ELN, MT1E, PITX2, MYADM, ANPEP, AQP1, ITGA4, CH25H, CPXM1	0.0966507	LINDGREN_BLADDER_CANCER_CLUSTER_2B
0.00419594	4	24	CTF1, CRYAB, BCAN, AEBP1	0.0967131	EBAUER_MYOGENIC_TARGETS_OF_PAX3_FOXO1_FUSION
0.00427296	13	137	SIX3, ZIC1, CORO6, CKM, PAX9, ACTN2, NCAN, TRIM17, RASSF1, SIM1, RYR2, PCDH10, MYF6	0.0976876	YAUCH_HEDGEHOG_SIGNALING_PARACRINE_DN
0.00432034	62	983	FAM83E, CH25H, TCTEX1D1, CAPS, WDR52, ZNF880, COL25A1, LAYN, ZNF662, CR1, PTPRO, ADARB2, IRAK2, SPAG6, ELF3, MT1M, CCDC13, CKM, SYNE1, GIPC2, SLC16A5, CAND2, BTG4, RIBC2, KATNAL2, NAPRT1, MYCBPAP, PROM1, MT1E, CES1, CCDC17, PER1, DLEC1, CYP2E1, POU2AF1, CYP2A6, LXN, C5orf49, IQSEC1, TNFRSF10D, CCDC65, CLIP4, CCDC11, ABHD12B, PSPN, COX7A1, AQP3, ANKRD45, TMEFF2, KRT7, C2orf40, BCAN, ACRBP, ALDH1L1…	0.0979741	DODD_NASOPHARYNGEAL_CARCINOMA_UP
0.00439591	14	152	MME, ACADS, RARRES2, CES1, KCNJ8, AMT, HAAO, HSD17B4, GPT, PDK4, CBR1, LCAT, AQP7, PON3	0.0988904	HOSHIDA_LIVER_CANCER_SUBCLASS_S3
0.00451592	59	929	SEC31B, HTR1B, SLC6A17, CLDN11, L3MBTL4, CD248, CXCL14, BCAN, GALR3, NEUROD1, RSPO2, BOLL, SIX3, KCNJ8, CPXM1, VIPR2, RASGRF2, CCKBR, LTB4R2, LHFPL5, SSTR1, AVPR1A, GHSR, PTPRO, CH25H, CORIN, SLC30A10, HS3ST2, FAM19A2, ITGA4, GALR1, PRLHR, DMRTA2, GYPC, ALOX12, NAPRT1, EMX2, DPP6, TRIM58, IGFBP7, GIPC2, VIM, GPR83, PLTP, ADRA1D, ITGA8, ZIC1, SOX1, CARTPT, C1QL2, STAC2, TBX15, SLC16A12, PAX3, PROM…	0.100784	MEISSNER_BRAIN_HCP_WITH_H3K4ME3_AND_H3K27ME3
0.00456081	13	138	SGK1, HSD17B4, CRYAB, CYBA, RARRES2, COL14A1, PTPRN, AEBP1, GYPC, BCAT1, ITGA8, DPP6, CDO1	0.100984	GRUETZMANN_PANCREATIC_CANCER_DN
0.00460153	35	496	RARRES2, COLEC11, ADCY4, HSPA12B, PLTP, AGTR1, NPR2, KRT8, HOXB6, FBLIM1, MSC, AQP1, MFGE8, NAPRT1, GRASP, AOX1, BCAT1, LAMA2, CLIP3, MXRA8, TCF21, AEBP1, PDK4, CPXM1, PAM, RUSC1, ANPEP, PDPN, LEPR, PROM1, KRT7, CLEC14A, NRTN, EFEMP1, KCNJ8	0.10109	LEE_BMP2_TARGETS_UP
0.00484641	5	35	ALDH1L1, IRF4, PAM, TNFRSF8, AQP3	0.104491	KLEIN_PRIMARY_EFFUSION_LYMPHOMA_UP
0.00484641	5	35	POU2AF1, MFGE8, LEPR, COL4A2, COL4A1	0.104491	LEE_LIVER_CANCER_DENA_UP
0.00486782	7	58	MSC, DKK3, SGK1, COL4A1, COL4A2, IGFBP7, CLDN4	0.104491	SWEET_KRAS_TARGETS_UP
0.00504956	4	25	ANPEP, TXNRD1, ELF3, SGK1	0.106762	DORN_ADENOVIRUS_INFECTION_12HR_DN
0.00504956	4	25	CA3, PDK4, LEPR, PROM1	0.106762	OHGUCHI_LIVER_HNF4A_TARGETS_UP
0.00512977	9	84	FAIM2, PDE1C, UPK3A, TNFRSF8, CA3, EPO, ALOX15B, HOXB13, NCAN	0.107261	MIKKELSEN_MEF_ICP_WITH_H3K27ME3
0.00522574	3	16	CLDN4, LXN, COX7A1	0.107261	MUELLER_METHYLATED_IN_GLIOBLASTOMA
0.00522574	3	16	PTH2R, CNTNAP2, ZIC1	0.107261	RICKMAN_HEAD_AND_NECK_CANCER_B
0.00522574	3	16	CXCL14, COL4A1, GPT	0.107261	NAKAYAMA_FGF2_TARGETS
0.00541024	7	59	KRT7, ELN, GJA4, AQP7, EFEMP1, VIM, PDE4B	0.10945	WESTON_VEGFA_TARGETS
0.00541024	7	59	CLIP3, DKK3, CXCL6, GABRA1, IGFBP7, COL4A2, TSPAN2	0.10945	HELLEBREKERS_SILENCED_DURING_TUMOR_ANGIOGENESIS
0.00559409	5	36	CBR1, JAM3, BOLL, DKK3, EFEMP1	0.110779	MCGARVEY_SILENCED_BY_METHYLATION_IN_COLON_CANCER
0.00559409	5	36	EFEMP1, CLDN4, ANPEP, PROM1, KRT8	0.110779	HUPER_BREAST_BASAL_VS_LUMINAL_DN
0.00559409	5	36	CIDEB, AOX1, DPYS, GPT, CYP4F2	0.110779	ANDERSEN_LIVER_CANCER_KRT19_DN
0.00616974	8	73	PER1, MT1M, AGTR1, TCAP, NID1, MT1E, PDK4, TMEM204	0.120481	CHEN_LVAD_SUPPORT_OF_FAILING_HEART_UP
0.00616974	8	73	HKR1, LHCGR, EXOSC2, KCNAB3, CYP26C1, DNM3, AEBP1, POU2AF1	0.120481	FIGUEROA_AML_METHYLATION_CLUSTER_4_UP
0.00658816	3	17	HOXA4, POU4F2, SOX15	0.126027	NIKOLSKY_OVERCONNECTED_IN_BREAST_CANCER
0.00658816	3	17	PRSS50, SPACA1, BOLL	0.126027	WEBER_METHYLATED_HCP_IN_SPERM_UP
0.00658816	3	17	KRT7, KRT8, RARRES2	0.126027	MISHRA_CARCINOMA_ASSOCIATED_FIBROBLAST_DN
0.00674572	8	74	FOXS1, AQP1, GPNMB, IGFBP7, CXCL14, NEFL, CRYAB, PDE1C	0.127347	SENESE_HDAC2_TARGETS_DN
0.00674778	30	421	ELN, PKP1, KRT83, IGF2BP3, SLC34A2, NRTN, CRYAB, KRT5, ZIC1, CCKBR, SIX3, DNAJC6, CAND2, DSC3, MFGE8, NCAN, SOX10, PROM1, HSPB2, KCNN4, ECHDC1, FABP5, MDFI, PDPN, SIM1, TTYH1, SOX15, DNM3, COL4A2, CLIP4	0.127347	SMID_BREAST_CANCER_BASAL_UP
0.00711281	4	27	IGF2, RARRES2, HOXA7, MXRA8	0.131587	LIEN_BREAST_CARCINOMA_METAPLASTIC
0.00711281	4	27	COL4A1, HAS2, COL4A2, EFEMP1	0.131587	ROZANOV_MMP14_TARGETS_SUBSET
0.00711281	4	27	HBA1, STMN2, TNFRSF8, MT1G	0.131587	HANN_RESISTANCE_TO_BCL2_INHIBITOR_UP
0.00731626	7	62	CYP4X1, TSPAN2, HOXD13, CLDN11, PON3, COL22A1, CD200	0.13397	RICKMAN_HEAD_AND_NECK_CANCER_A
0.00733691	5	38	ELF3, AEBP1, COL4A1, KRT8, NID1	0.13397	BORLAK_LIVER_CANCER_EGF_UP
0.00773079	15	177	SV2A, AOX1, NID1, IGFBP7, BICC1, MME, ANPEP, GNG11, JAM3, AGTR1, GYPC, SYNE1, HAS2, LEPR, HOXA5	0.140252	ONDER_CDH1_TARGETS_2_UP
0.00792251	13	147	CXCL14, CALML3, LOR, DPP6, DSC3, ELMO3, AQP3, PRSS3, MT1M, PKP1, KRT5, LTB4R, SOX15	0.142808	JAEGER_METASTASIS_DN
0.00802052	8	76	CYP26C1, GNG11, DNM3, WT1, GPR149, MOS, HKR1, ZNF662	0.14353	FIGUEROA_AML_METHYLATION_CLUSTER_1_UP
0.00816278	11	118	PDK4, COL14A1, LXN, MME, CLDN11, MAB21L2, CXCL6, HAS2, BICC1, PDE4B, SLC2A5	0.14353	RIGGI_EWING_SARCOMA_PROGENITOR_DN
0.00816671	3	18	KRT8, VIM, KRT5	0.14353	HONRADO_BREAST_CANCER_BRCA1_VS_BRCA2
0.00816671	3	18	PROM2, AOX1, PDK4	0.14353	PEDERSEN_METASTASIS_BY_ERBB2_ISOFORM_6
0.00833777	4	28	COX7A1, RARRES2, TF, TMEM204	0.144792	BOYAULT_LIVER_CANCER_SUBCLASS_G3_DN
0.00834151	5	39	CALML3, PRSS3, PAM, POU4F2, OTP	0.144792	HANN_RESISTANCE_TO_BCL2_INHIBITOR_DN
0.00872287	8	77	HSD17B1, COLEC11, NEFL, LXN, CDO1, TRIM58, AQP3, KRT7	0.150095	KIM_RESPONSE_TO_TSA_AND_DECITABINE_UP
0.0091808	2	10	CXCL14, DKK3	0.150095	MAHADEVAN_IMATINIB_RESISTANCE_UP
0.0091808	2	10	DSC3, KRT5	0.150095	INAMURA_LUNG_CANCER_SCC_UP
0.0091808	2	10	PCDH10, CDX2	0.150095	SCHLESINGER_METHYLATED_IN_COLON_CANCER
0.0091808	2	10	AQP3, EFEMP1	0.150095	MASRI_RESISTANCE_TO_TAMOXIFEN_AND_AROMATASE_INHIBITORS_DN
0.0091808	2	10	FOXS1, TSPAN11	0.150095	MEISSNER_ES_ICP_WITH_H3K4ME3_AND_H3K27ME3
0.0091808	2	10	KRT7, VIM	0.150095	LEE_LIVER_CANCER_HEPATOBLAST
0.0091808	2	10	ANPEP, ELF3	0.150095	DORN_ADENOVIRUS_INFECTION_48HR_UP
0.0091808	2	10	CA4, KRT8	0.150095	VANDESLUIS_COMMD1_TARGETS_GROUP_4_UP
0.0091808	2	10	HSD17B4, G0S2	0.150095	SANDERSON_PPARA_TARGETS
0.00942053	6	52	VSX1, NRTN, SLC34A2, OXT, AQP3, PITX2	0.151706	MEISSNER_BRAIN_HCP_WITH_H3K4ME2_AND_H3K27ME3
0.00942053	6	52	CIDEB, SLC30A10, HAAO, RARRES2, NECAB1, ELOVL3	0.151706	OHGUCHI_LIVER_HNF4A_TARGETS_DN
0.00944115	5	40	DPYS, HOXA5, CYP4F2, CA3, CYP2E1	0.151706	LEE_LIVER_CANCER_DENA_DN
0.00970146	4	29	CES1, FABP5, ALDH1L1, AOX1	0.155003	YAMASHITA_LIVER_CANCER_STEM_CELL_DN
0.00997414	3	19	AQP7, VIM, ELN	0.157569	WESTON_VEGFA_TARGETS_12HR
0.00997414	3	19	FABP5, AQP7, PLIN4	0.157569	WANG_CLASSIC_ADIPOGENIC_TARGETS_OF_PPARG
0.0102664	8	79	TCF21, JAM3, SPAG6, MFGE8, ZPBP2, PLTP, VIPR2, SPEM1	0.16128	MATZUK_SPERMATOZOA
0.0105946	7	66	BARHL2, HMX2, PTGDR, MEOX2, PAX9, ADARB2, TRIM68	0.1644	TANAKA_METHYLATED_IN_ESOPHAGEAL_CARCINOMA
0.0106404	5	41	PCDHGB6, HOXA7, HOXB13, EPHA5, VSTM2A	0.1644	NOUZOVA_METHYLATED_IN_APL
0.0106404	5	41	P2RX6, C2orf40, COX7A1, SLC16A5, MRPS21	0.1644	MIKKELSEN_ES_LCP_WITH_H3K4ME3
0.0111111	8	80	CNTNAP2, PROM1, ZIC1, EMX2, SIX3, EFEMP1, FOXG1, TTYH1	0.170406	LEE_NEURAL_CREST_STEM_CELL_DN
0.0111787	9	94	GREM2, STMN2, FOXG1, NEUROD1, DMRTA2, NCAN, TTYH1, PKIA, RSPO2	0.170406	MARTORIATI_MDM4_TARGETS_NEUROEPITHELIUM_DN
0.0112109	4	30	PDPN, G0S2, COL4A1, COL4A2	0.170406	CROMER_TUMORIGENESIS_UP
0.0115276	6	54	VIM, IGF2BP3, BCAT1, FABP5, HAS2, G0S2	0.172423	LIEN_BREAST_CARCINOMA_METAPLASTIC_VS_DUCTAL_UP
0.0115276	6	54	AKR1E2, SMC1B, PCDHB14, AIPL1, PAX9, CCKBR	0.172423	SHETH_LIVER_CANCER_VS_TXNIP_LOSS_PAM5
0.0115276	6	54	MAGI2, STMN2, SLC16A5, WNT2, FGF2, ANPEP	0.172423	BROWNE_HCMV_INFECTION_16HR_DN
0.0119437	5	42	NID1, COL14A1, VIM, COL4A1, CXCL14	0.175881	KIM_GLIS2_TARGETS_UP
0.0120221	3	20	AOX1, VWC2, FAM19A2	0.175881	HARRIS_BRAIN_CANCER_PROGENITORS
0.0120221	3	20	ELOVL3, CBR1, COX7A1	0.175881	WANG_ADIPOGENIC_GENES_REPRESSED_BY_SIRT1
0.0121966	2	11	LXN, NID1	0.175881	MOROSETTI_FACIOSCAPULOHUMERAL_MUSCULAR_DISTROPHY_UP
0.0121966	2	11	MME, KCNN4	0.175881	NIELSEN_LEIOMYOSARCOMA_UP
0.0121966	2	11	EFEMP1, CLDN4	0.175881	MALIK_REPRESSED_BY_ESTROGEN
0.0121966	2	11	ACTN2, CRYAB	0.175881	CHEMELLO_SOLEUS_VS_EDL_MYOFIBERS_UP
0.0125704	36	548	DMGDH, COL22A1, KCNAB3, CD248, G0S2, BHMT2, EPDR1, LXN, NPR2, BICC1, ECT2L, CIDEB, VSX1, DDX25, CTF1, WDR86, CYP11A1, SNAP91, CLDN11, HOXC4, PER1, TCAP, CLIP3, PAX3, SPACA1, ISLR, AOX1, CORO6, DKK3, NCAN, CMYA5, C10orf107, GIPC2, ANPEP, HSPB2, PCDHB13	0.178826	BRUINS_UVC_RESPONSE_VIA_TP53_GROUP_A
0.0125816	22	302	IGF2BP3, CBR1, TNFRSF10D, FBLIM1, HOXA5, MME, AKR1B1, TOX2, DSC3, KRT5, MAML2, MT1E, MT1G, COL4A2, COL4A1, BICC1, MFGE8, CRYAB, FGF2, CLIP4, SGK1, IGFBP7	0.178826	CHARAFE_BREAST_CANCER_LUMINAL_VS_BASAL_DN
0.0125916	7	68	CRYAB, HOXC4, COX7A1, SLC16A5, MXRA8, MAGI2, FGF2	0.178826	FERREIRA_EWINGS_SARCOMA_UNSTABLE_VS_STABLE_DN
0.0128591	9	96	GPNMB, MARCH1, PPP1R1B, GJA4, CR1, TSPAN2, PDK4, SGK1, CDH8	0.1792	TAKEDA_TARGETS_OF_NUP98_HOXA9_FUSION_8D_DN
0.0128728	4	31	COL4A2, COL4A1, PRKCB, ERCC3	0.1792	VANHARANTA_UTERINE_FIBROID_UP
0.0128728	4	31	PRKCB, LCAT, PDE4B, SLC2A5	0.1792	SHIPP_DLBCL_CURED_VS_FATAL_DN
0.0128728	4	31	P2RX6, PSPN, MRPS21, SERPINB9	0.1792	MIKKELSEN_MEF_LCP_WITH_H3K4ME3
0.0132867	10	111	CPNE8, WNT2, BCAT1, GPNMB, ADAMTS12, IGF2BP3, LAMA2, EFEMP1, COL4A1, CDH6	0.183148	VECCHI_GASTRIC_CANCER_ADVANCED_VS_EARLY_UP
0.0132867	10	111	CARTPT, IRF4, COL4A2, SIPA1, TCF21, KRT8, MSC, MDFI, TNFRSF8, SGK1	0.183148	TSAI_RESPONSE_TO_IONIZING_RADIATION
0.0133555	5	43	CYP4F2, GPT, CYP2E1, HSD17B4, ALDH1L1	0.183198	WOO_LIVER_CANCER_RECURRENCE_DN
0.0140313	12	142	DKK3, ISLR, MFGE8, CDO1, CXCL14, GPNMB, CDH6, PAM, PROM1, CXCL6, COL14A1, AEBP1	0.191535	RODWELL_AGING_KIDNEY_NO_BLOOD_UP
0.014321	3	21	SLC2A5, NEUROD1, PYY	0.194544	KANG_GLIS3_TARGETS
0.0146935	4	32	PAX3, COL4A2, GAS2, DKK3	0.198645	TSENG_ADIPOGENIC_POTENTIAL_DN
0.0148516	7	70	HSD17B4, OXCT2, RASGRF2, NRTN, SNAP91, SOX1, SGK1	0.199821	XU_GH1_EXOGENOUS_TARGETS_DN
0.0157133	2	12	CD248, IGFBP7	0.208424	XU_HGF_SIGNALING_NOT_VIA_AKT1_48HR_DN
0.0157133	2	12	IGF2, FABP5	0.208424	GOUYER_TATI_TARGETS_DN
0.0157133	2	12	CA3, VIM	0.208424	MATTHEWS_AP1_TARGETS
0.0160717	14	176	PLTP, WNT2, RPL37, P2RX6, GFRA3, CA3, DPYS, GFM2, SGK1, PON3, HOXD9, WT1, KRT7, ACVRL1	0.212176	RIZKI_TUMOR_INVASIVENESS_3D_DN
0.016521	5	45	TRIM59, CH25H, LAMA2, MEOX2, MME	0.214782	CORRE_MULTIPLE_MYELOMA_DN
0.016521	5	45	KCNN4, COX7A1, MRPS21, PSPN, SERPINB9	0.214782	MIKKELSEN_MCV6_LCP_WITH_H3K4ME3
0.0166791	4	33	GJA4, VIM, ELN, AQP7	0.214782	WESTON_VEGFA_TARGETS_6HR
0.0166791	4	33	MT1A, ITGA4, SV2A, CCKBR	0.214782	GUILLAUMOND_KLF10_TARGETS_UP
0.0168801	3	22	SOX10, ANPEP, HOXA7	0.214782	LIU_CDX2_TARGETS_UP
0.0168801	3	22	UCN, G0S2, FGF2	0.214782	MA_PITUITARY_FETAL_VS_ADULT_UP
0.0168801	3	22	HOXC8, RSPO2, PITX2	0.214782	SCHRAETS_MLL_TARGETS_DN
0.0168801	3	22	UPK3A, PDE1C, CNTNAP2	0.214782	MIKKELSEN_IPS_ICP_WITH_H3K27ME3
0.0172921	16	210	CAND2, GNG11, FGF2, CDH6, HAS2, PDPN, NEUROD1, SIPA1, G0S2, CLDN4, SYNE1, MT1E, GJA4, PLCD1, PDE1C, MT1A	0.219034	BROWNE_HCMV_INFECTION_14HR_DN
0.0173925	7	72	FEZ1, CDX2, MT1A, HOXB13, HBA1, DSC3, WT1	0.219317	SCHLESINGER_METHYLATED_DE_NOVO_IN_CANCER
0.0176445	14	178	PAM, NRTN, AGTR1, RARRES2, PDE4B, FEZ1, AEBP1, ISLR, ALOX12, EXOSC2, EFEMP1, CDO1, PDLIM4, VIM	0.221501	KAAB_HEART_ATRIUM_VS_VENTRICLE_UP
0.0178864	9	101	HAS2, VSTM2A, ECHDC1, CCDC11, FBXL21, PITX2, SLC5A7, CDH8, CTF1	0.22354	RAO_BOUND_BY_SALL4_ISOFORM_A
0.0182537	6	59	FGF2, MSC, KRT7, VIM, G0S2, CXCL6	0.226482	HINATA_NFKB_TARGETS_FIBROBLAST_UP
0.0182828	5	46	MT1M, MT1E, NID1, MT1G, MYADM	0.226482	NAKAMURA_ADIPOGENESIS_EARLY_UP
0.018835	4	34	VIM, IGF2, COL4A1, COL4A2	0.227492	KHETCHOUMIAN_TRIM24_TARGETS_UP
0.018835	4	34	BCAT1, STMN2, P2RY6, TCF21	0.227492	GYORFFY_DOXORUBICIN_RESISTANCE
0.0197073	3	23	FGF10, RSPO2, IGF2	0.227492	THEODOROU_MAMMARY_TUMORIGENESIS
0.0197073	3	23	ACRBP, DNAH10, DNHD1	0.227492	WHITEHURST_PACLITAXEL_SENSITIVITY
0.0197073	3	23	MEOX2, ACVRL1, HBA1	0.227492	MCDOWELL_ACUTE_LUNG_INJURY_DN
0.0197073	3	23	MFGE8, NPY, NRTN	0.227492	HUNSBERGER_EXERCISE_REGULATED_GENES
0.0197073	3	23	SGK1, HAAO, MT1A	0.227492	PIONTEK_PKD1_TARGETS_UP
0.0197073	3	23	FOXG1, KCNN4, ENPEP	0.227492	PLASARI_TGFB1_SIGNALING_VIA_NFIC_1HR_UP
0.0197397	2	13	PRSS3, CTF1	0.227492	NAKAMURA_CANCER_MICROENVIRONMENT_UP
0.0197397	2	13	GAS2, PKIA	0.227492	DAVICIONI_PAX_FOXO1_SIGNATURE_IN_ARMS_DN
0.0197397	2	13	ADCY8, NEFL	0.227492	PEPPER_CHRONIC_LYMPHOCYTIC_LEUKEMIA_DN
0.0197397	2	13	AEBP1, CDH8	0.227492	OUELLET_CULTURED_OVARIAN_CANCER_INVASIVE_VS_LMP_DN
0.0197397	2	13	SGK1, NEUROD1	0.227492	HERNANDEZ_ABERRANT_MITOSIS_BY_DOCETACEL_4NM_UP
0.0197397	2	13	AQP3, MDFI	0.227492	AMIT_EGF_RESPONSE_20_MCF10A
0.0197397	2	13	LEPR, AQP3	0.227492	SCHURINGA_STAT5A_TARGETS_UP
0.0197397	2	13	SOX10, GPNMB	0.227492	MCGOWAN_RSP6_TARGETS_UP
0.0197397	2	13	FOXB1, OXT	0.227492	MATZUK_POSTIMPLANTATION_AND_POSTPARTUM
0.0208835	11	134	AIPL1, DSC3, GPR83, L1TD1, PAX3, POU2AF1, SLC16A12, TRIM58, COL4A1, CPNE8, FBLIM1	0.239691	FLORIO_NEOCORTEX_BASAL_RADIAL_GLIA_UP
0.0211664	4	35	PITX2, HOXB13, GCM2, SOX1	0.241951	RIZ_ERYTHROID_DIFFERENTIATION_HBZ
0.0215248	9	104	POU2AF1, ITGA4, GNG11, NID1, DNAJC15, PLTP, ANPEP, PDK4, SERPINB9	0.245052	WALLACE_PROSTATE_CANCER_RACE_UP
0.0217683	7	75	TMEM204, SNAP91, CD200, LEPR, GREM2, PDK4, DNAJC15	0.246825	HOELZEL_NF1_TARGETS_DN
0.0221831	5	48	HOXD13, SOX1, EVX2, PCDH10, FOXG1	0.247536	DAWSON_METHYLATED_IN_LYMPHOMA_TCL1
0.0221831	5	48	CARTPT, LCAT, PDLIM4, NEFL, FEZ1	0.247536	KANNAN_TP53_TARGETS_UP
0.0221831	5	48	PKIA, LCAT, HAAO, MME, LHCGR	0.247536	HOSHIDA_LIVER_CANCER_LATE_RECURRENCE_DN
0.0221831	5	48	ANPEP, NSA2, CBR1, LXN, ELF3	0.247536	YAO_TEMPORAL_RESPONSE_TO_PROGESTERONE_CLUSTER_9
0.0222831	12	151	BCAT1, UTS2R, ITGA4, ALOX15B, AVPR1A, PTPRO, GALR1, CXCL6, LEP, HAS2, MYCBPAP, DKK3	0.247668	AFFAR_YY1_TARGETS_DN

## Sheet: S5d. GBM
pvalue	nhyper	ntotal	genes	padj	pathway
3.65655e-22	81	684	GRIN3A, ALX3, THBD, KAZALD1, ADAMTSL3, DIO3, HHEX, PTGER2, TMEM30B, KL, SYT10, RIPK4, SPOCK3, MAB21L2, DLX2, RASGRF2, SLC35F3, SPAG6, C1orf115, SOX10, ZIC1, GPR88, NPHS2, ADRB3, NEFL, TACSTD2, HOXD13, TRHDE, LAMA3, PAX9, VAX1, MSC, BNC1, HOXD11, PAX3, CYP26C1, SSTR1, SLC27A2, DMRT2, GPR83, FOXE1, KLHL35, TRPC6, TBX3, TOX2, SDR16C5, MLNR, LTBP2, IL17RA, AQP5, FLT3, KLF14, KCNH1, SCTR, ZAR1, CYP1B1…	9.47777e-19	BENPORATH_SUZ12_TARGETS
1.82663e-18	76	700	HOXD4, MSX2, HOXD9, HOXD3, MYF6, KAZALD1, DIO3, GPR88, PAX3, HOXA2, ALX3, MLNR, SIM1, GPR6, KCNH1, FAM19A4, KL, SSTR1, DLK1, SLC22A3, RFX6, SLC35F3, TWIST1, HOXD11, BNC1, CYP26C1, MAB21L2, IRAK3, DOK6, SPAG6, DSC3, HOXA9, HOXD8, ALX1, HOXA10, DMRT2, FBN2, SPOCK3, PAX8, ADRB3, GRIN3A, SYT10, DLX2, ADRA1A, BARHL2, HHEX, NEFL, RELN, CYP1B1, TBX3, ZIC1, GCM2, KLHL35, MSC, NINL, BCL2L10, THBD, CMTM2, …	2.36731e-15	BENPORATH_EED_TARGETS
1.65364e-16	76	756	RFX6, VAX1, ADRA1A, SLIT3, DLX2, HOXD8, TBX3, C1orf115, DSC3, KCNH1, HTR1A, SLC22A3, TMEM30B, HS3ST4, PAX3, GCM2, MAB21L2, BARHL2, SIM1, AQP5, SPAG6, KAZALD1, NEFL, MSC, CNTN2, DLK1, SATB2, DMRT2, FOXE3, GPR88, RBP7, ALX3, HOXD13, ZIC1, KLHL35, PAX9, GPR6, SPOCK3, HOXA2, PAX8, HOXD4, KL, GRIN3A, CMTM2, PTGER2, FGF8, HOXD9, ADRB3, TWIST1, SLC27A2, MYF6, DOK6, TACSTD2, SCTR, HHEX, SLC35F3, ASCL4, C…	1.42874e-13	BENPORATH_ES_WITH_H3K27ME3
1.60616e-13	70	751	TES, SVIL, SEC31B, TCF15, MAL2, CLDN5, CLDN11, THBD, RASEF, ARHGAP10, OXTR, RIPK4, TPBG, BOLL, LTBR, IL17RA, GALNT6, GNAL, FBLN2, HTR1A, CMTM8, HHEX, IRAK3, FOSL1, GRHL2, SHE, PPAP2C, ALDH1A2, GREM1, TBX18, RASGRF2, PPP1R14A, LTB4R2, RELN, CNTN2, SSTR1, ARHGEF17, SLC13A5, TBX3, HCN1, SLC22A3, F2RL1, DMRT2, DSG2, ALOX12, DLX2, NAPRT1, TRHDE, MSX2, PIK3R5, TNS3, TRIM58, GIPC2, SLC27A2, TACSTD2, POP…	1.04079e-10	MEISSNER_BRAIN_HCP_WITH_H3K4ME3_AND_H3K27ME3
2.38678e-13	40	294	OXTR, SSTR1, PIK3R5, PTGER2, DES, C1orf115, TACSTD2, SEC31B, LTB4R2, GALNT6, F2RL1, KL, KCNG1, DSG2, THBD, ALOX12, MARVELD2, NAPRT1, MFSD6L, NLGN2, SPAG6, TPM2, IRAK3, DLGAP1, RASEF, TMEM30B, HTATIP2, CLDN11, CTSZ, GIPC2, TRIM58, LTBR, GPR83, MCOLN2, CLDN5, RASSF10, MAL2, GRHL2, KRT19, RASGRF2	1.23731e-10	MEISSNER_NPC_HCP_WITH_H3_UNMETHYLATED
8.59746e-13	50	449	SLC10A4, FBN2, KL, HOXD13, NEFL, HOXD3, ALX3, ADRB3, BNC1, ZIC1, SLC35F3, MYF6, DMRT2, DSC3, VAX1, TMEM30B, GPR88, PAX9, SPOCK3, SLC27A2, LTBP2, SPAG6, DIO3, HTR1A, FOXE1, MAB21L2, MSC, DOK6, HOXD8, PAX3, KLHL35, SCTR, KCNH1, FAM19A4, GRIN3A, CMTM2, AQP5, SSTR1, HHEX, PTGER2, KAZALD1, PAX8, BARHL2, CYP26C1, ADRA1A, DLX2, HOXD4, THBD, TBX3, HOXD9	3.7141e-10	BENPORATH_PRC2_TARGETS
4.96973e-11	30	209	UPB1, KCNA4, HOXD13, SPAG6, IQCA1, CNTNAP5, LRRC61, HOXA9, ADRA1A, REC8, TWIST1, CYYR1, SLC5A7, PIK3R5, SVIL, ALX1, CMTM2, GBGT1, KL, CPT1B, SEC31B, CIDEB, ADAM30, NEFL, SLC22A3, GIPC2, BNC1, SYT10, HOXD3, PAX9	1.84022e-08	HATADA_METHYLATED_IN_LUNG_CANCER_UP
2.10862e-10	29	208	FGF8, FOXE1, DIO3, ALX1, SIM1, HOXD9, TPM2, KRT19, EPCAM, LTBP2, HOXD8, NKX2.4, FOXD4, HOXA4, MFSD6L, TMEM30B, AQP5, HOXD10, FOXE3, ALX3, NPY, HOXA10, HOXD11, BARHL2, HOXA5, IGFBPL1, BNC1, DLK1, HOXD13	6.83194e-08	MEISSNER_BRAIN_HCP_WITH_H3K27ME3
7.48858e-10	40	377	OXTR, ALOX12, BOLL, NETO1, VAX1, DSG2, SHE, CNTN2, SPOCK1, TACSTD2, DES, KCNH1, FOXD4, RELN, MFSD6L, IGFBPL1, KL, RASEF, SPRN, AQP5, HCN1, SLC27A2, HTR1A, GALNT6, NPHS2, ALX1, SCTR, GRHL2, PAX8, SLC35F3, SLC22A3, TCF15, BAI1, ADRA1A, SYT10, HOXD4, CNTN4, RYR2, FOXE3, BARHL2	2.15671e-07	MIKKELSEN_MEF_HCP_WITH_H3K27ME3
3.47766e-09	30	247	SLC22A3, KCNH1, ALDH1A2, EVX2, ALX1, FOXE3, HOXD11, MAL2, DMRT2, HOXD10, RYR2, LTBP2, SIM1, CNTN2, HTR1A, BAI1, RIPK4, HOXA9, HOXD9, TCF15, PAX3, BNC1, TRPC6, IGFBPL1, ALX3, HCN1, VAX1, FLT3, MSC, TBX3	9.0141e-07	MIKKELSEN_NPC_HCP_WITH_H3K27ME3
2.92213e-08	8	21	AQP5, HTR1A, DES, HOXA9, TRHDE, PCDHAC1, GNAL, GPR6	6.8856e-06	SCHLESINGER_H3K27ME3_IN_NORMAL_AND_METHYLATED_IN_CANCER
4.11303e-08	26	216	GNAL, ELMO3, LPAR3, EPCAM, SERPINB1, DSC3, DSG2, CNTNAP2, GRHL2, KCNG1, MYO1B, POPDC3, TACSTD2, QPCT, CLDN1, G0S2, SPINT2, RBM47, LAMA3, RIPK4, GALNT6, THBD, MST1R, TMEM30B, SYK, HDAC9	8.88414e-06	ONDER_CDH1_TARGETS_2_DN
2.51188e-07	31	312	FOXE3, HOXD4, SCTR, SSTR1, FOXE1, TRHDE, AQP5, NKX2.4, SYT10, SHE, KL, FGF8, TMEM30B, HOXD11, FBXO41, HOXD9, BAI1, ALOX12, CNTN2, ZIC1, KCNH1, RELN, HOXD8, EVX2, DOK6, NPHS2, ANK1, TRIM58, DIO3, SLC35F3, OXTR	5.0083e-05	MIKKELSEN_MCV6_HCP_WITH_H3K27ME3
5.48344e-07	27	260	DMRT2, NKX2.4, ALDH1A2, SLC22A3, FGF8, AHR, BNC1, FOXD4, FOXE1, TBX3, PAX3, FLT3, RYR2, BAI1, SIM1, KCNH1, FOXE3, HOXD13, HCN1, CNTN2, MSC, MSX2, VAX1, IGFBPL1, TCF15, LTBP2, HOXD11	0.000101522	MEISSNER_NPC_HCP_WITH_H3K4ME2_AND_H3K27ME3
1.1285e-06	11	57	MARVELD2, ADAM32, LTB4R, REC8, C10orf67, NLGN2, BCL2L10, SPAG6, CNTNAP2, PCDHAC1, DLGAP1	0.000195004	MIKKELSEN_MEF_HCP_WITH_H3_UNMETHYLATED
2.19991e-06	5	12	DBF4, ALX1, CLDN23, PMAIP1, SLC25A40	0.000356386	NEWMAN_ERCC6_TARGETS_UP
4.48131e-06	10	54	GRHL2, SPINT2, DSG2, TMEM30B, FZD6, RIPK4, MAL2, EPCAM, MARVELD2, CLDN1	0.000683268	HOLLERN_EMT_BREAST_TUMOR_DN
6.70114e-06	5	14	REC8, CMTM2, ADAM30, BOLL, ZPBP	0.000964964	WEBER_METHYLATED_HCP_IN_FIBROBLAST_DN
7.90901e-06	29	331	NPY, TES, FZD6, SLC27A2, MTMR7, ANK1, SPOCK1, FLNC, SLIT3, POPDC3, SLC35F3, DLK1, GNAL, SPINT2, BOLL, PCDHAC1, IL17RA, LPAR3, RFTN1, MARCH11, HOXD8, PPP1R14A, CECR6, FBXL21, FBLN2, AQP5, SHE, PPAP2C, EPCAM	0.00107895	MEISSNER_NPC_HCP_WITH_H3K4ME2
1.5619e-05	6	23	TTC12, ITGBL1, FZD6, FLNC, AQP5, G0S2	0.00202422	NOUSHMEHR_GBM_SILENCED_BY_METHYLATION
2.49446e-05	12	88	ADRA1A, BNC1, DSC3, GPR83, ITGBL1, MARVELD2, PAX3, SDR16C5, SHE, TRIM58, C4orf32, TES	0.00307888	FLORIO_NEOCORTEX_BASAL_RADIAL_GLIA_UP
3.06368e-05	7	34	MPO, F2RL1, GPR160, EPCAM, TMEM176A, SELM, LTB4R	0.00360957	BOYLAN_MULTIPLE_MYELOMA_PCA1_UP
3.98721e-05	13	105	TMEM30B, GPR160, MAL2, RASEF, SVIL, GRHL2, ELMO3, TACSTD2, MST1R, KRT19, RIPK4, RBM47, PLEKHA7	0.00449341	COLDREN_GEFITINIB_RESISTANCE_DN
4.77792e-05	7	36	DLX6, PAX8, TES, C1orf86, KRT19, S100A13, AHR	0.00501334	YAO_TEMPORAL_RESPONSE_TO_PROGESTERONE_CLUSTER_9
4.8354e-05	9	57	TSPYL5, TES, NEFL, KRT19, TACSTD2, TRIM58, HTATIP2, SLC27A2, F2RL1	0.00501334	KIM_RESPONSE_TO_TSA_AND_DECITABINE_UP
6.82762e-05	26	317	RASSF10, C20orf85, CYP26C1, NAPRT1, CMTM2, G0S2, SLC13A5, SSTR1, TACSTD2, MLNR, CNTN2, ASCL4, NHLRC1, BARHL2, HTR1A, PTGER2, FGF8, MFSD6L, VAX1, GPR6, DHRS3, COX7A1, ADRB3, IGFBPL1, KRT19, PIK3R5	0.00680661	MARTENS_TRETINOIN_RESPONSE_UP
7.12475e-05	5	20	EPCAM, TMEM30B, MAL2, TACSTD2, MARVELD2	0.00683976	AIGNER_ZEB1_TARGETS
7.71963e-05	4	13	CIDEB, SLC22A3, CYP2E1, ADRA1A	0.00714617	LEE_LIVER_CANCER
8.16619e-05	6	29	EHHADH, LEPR, QPCT, CHKB, GIPC2, TES	0.00723309	LEE_LIVER_CANCER_CIPROFIBRATE_UP
8.37163e-05	40	583	ADRB3, DLGAP1, TRHDE, MYO1B, QPCT, BOK, NPY, HTR1A, CHKB, NLGN2, CYP2E1, TACSTD2, MSX2, OXTR, DDN, ZNF280D, HOXD3, GRIN3A, FOXD4, SYK, SLC27A2, LAMA3, NEFL, BARHL2, LEPR, EHHADH, SOX10, SSTR1, KCNA4, GNAL, EPCAM, F2RL1, KL, MTMR7, P2RY6, THBD, HOXA4, CNTN2, AHR, PHAX	0.00723309	YOSHIMURA_MAPK8_TARGETS_UP
9.06673e-05	11	86	TPBG, HOXD8, RELN, POPDC3, QPCT, HTATIP2, RBM47, COX7A1, LAMA3, BOLL, CNTNAP2	0.00738107	FOSTER_KDM1A_TARGETS_UP
9.21008e-05	15	142	KCNA4, SLIT3, THBD, PAX9, HDAC9, DLX2, BNC1, ALX1, G0S2, DHRS3, KAZALD1, FBN2, HOXA10, PAX3, MST1R	0.00738107	WANG_MLL_TARGETS
9.39719e-05	8	50	CLDN1, GALNT6, TACSTD2, SLC22A3, MSX2, TBX3, DSC3, QPCT	0.00738107	SABATES_COLORECTAL_ADENOMA_UP
0.000110354	8	51	MARVELD2, TMEM30B, SPINT2, RTKN, GRHL2, TACSTD2, ELMO3, MAL2	0.00841289	CHARAFE_BREAST_CANCER_BASAL_VS_MESENCHYMAL_UP
0.000128858	6	31	DLGAP1, ZIC1, VAX1, ERG, GPR88, ASCL4	0.00954284	KONDO_PROSTATE_CANCER_WITH_H3K27ME3
0.000133165	12	103	GPR160, EPCAM, DSG2, TMEM176A, TMEM176B, MPO, LTB4R, C15orf48, DHRS3, TNS3, SELM, F2RL1	0.0095879	BOYLAN_MULTIPLE_MYELOMA_C_D_DN
0.000157815	11	91	THBD, CLDN5, G0S2, ERG, HHEX, KL, TACSTD2, GIPC2, C1orf115, DSG2, ALDH1A2	0.0110556	BOQUEST_STEM_CELL_DN
0.000169134	4	15	OXTR, THBD, CFD, CLDN1	0.0114046	ZHENG_IL22_SIGNALING_UP
0.000171597	18	197	AHR, CYP1B1, TACSTD2, TES, GALNT6, HTR1A, CLDN5, SVIL, ALX3, TMEM176A, TWIST1, DLK1, FOXE1, QPCT, ALOX12, COX7A1, HOXA9, PMAIP1	0.0114046	SATO_SILENCED_BY_METHYLATION_IN_PANCREATIC_CANCER_1
0.000238399	4	16	HOXD8, CTSZ, MSX2, FZD6	0.0151079	SCHRAETS_MLL_TARGETS_UP
0.000238976	6	34	DSG2, TMEM176A, TRIM58, TMEM176B, RNF32, RUNDC3B	0.0151079	ZHAN_MULTIPLE_MYELOMA_MS_UP
0.000259769	12	110	THBD, DSC3, F2RL1, ELMO3, TACSTD2, MST1R, KRT19, QPCT, GRHL2, LTB4R, SPINT2, LAMA3	0.0160315	JAEGER_METASTASIS_DN
0.00028253	10	83	SYNM, HOXA9, CMTM8, CMYA5, OXTR, DSC3, CLDN11, LAMA3, CFD, IQCA1	0.0168895	TURASHVILI_BREAST_DUCTAL_CARCINOMA_VS_DUCTAL_NORMAL_DN
0.000286705	9	70	HOXA10, CYP1B1, TMEM176A, HOXA9, TMEM176B, HOXA5, HOXA4, G0S2, HOXA6	0.0168895	VERHAAK_AML_WITH_NPM1_MUTATED_UP
0.00032729	4	17	DES, CMYA5, CYP1B1, TPM2	0.0188519	RICKMAN_HEAD_AND_NECK_CANCER_F
0.000359697	3	10	CPT1B, EHHADH, G0S2	0.0202681	SANDERSON_PPARA_TARGETS
0.000377176	28	389	CLDN23, CHKB, TMEM30B, PHPT1, DSG2, KRT19, QPCT, SPINT2, C1orf86, MSC, NAPRT1, EPCAM, SERPINB1, SELM, THBD, TMEM176B, MAL2, KCNG1, ALDH1A2, PPP1R14A, SULT1A1, OXTR, HIST3H2A, PPAP2C, LEPR, FZD6, TMEM176A, RTKN	0.0208009	LEE_BMP2_TARGETS_UP
0.000405982	9	73	MCOLN2, FLT3, EPCAM, SPOCK1, HOXA9, HOXA5, C15orf48, CFD, DHRS3	0.021923	TAKEDA_TARGETS_OF_NUP98_HOXA9_FUSION_10D_UP
0.000439171	4	18	SOX10, HOXA9, HOXA2, CFD	0.0232312	LIU_CDX2_TARGETS_UP
0.000548372	3	11	TES, KRT19, COX7A1	0.0276068	MUELLER_METHYLATED_IN_GLIOBLASTOMA
0.000548372	3	11	DLGAP1, KL, ANK1	0.0276068	MEISSNER_BRAIN_HCP_WITH_H3K4ME2
0.000556001	11	104	ZIC1, CLDN1, PAX9, RIPK4, MC1R, SIM1, RYR2, AQP5, AQPEP, MYF6, TMEM200C	0.0276068	YAUCH_HEDGEHOG_SIGNALING_PARACRINE_DN
0.000575142	8	63	KLHL35, RBP7, THBD, ALX3, FOXE1, DSC3, LAMA3, TBX3	0.0276068	SCHLESINGER_METHYLATED_DE_NOVO_IN_CANCER
0.000575142	8	63	HTR1A, RIPK4, DIO3, HOXD10, HOXD9, ALX1, ALX3, HOXA10	0.0276068	MEISSNER_NPC_HCP_WITH_H3K27ME3
0.000653755	5	29	TMEM176A, COX7A1, GBGT1, TMEM176B, SERPINB9	0.0302595	MIKKELSEN_MCV6_LCP_WITH_H3K4ME3
0.000653755	5	29	DLK1, MST1R, SLC22A3, QPCT, MAGEL2	0.0302595	BRIDEAU_IMPRINTED_GENES
0.000746413	4	20	CYP2E1, FBN2, ALOX12, PAX9	0.0328339	RICKMAN_HEAD_AND_NECK_CANCER_E
0.000794791	6	41	GRHL2, ACOT4, SPINT2, KRT19, EPCAM, MAL2	0.0328339	LIEN_BREAST_CARCINOMA_METAPLASTIC_VS_DUCTAL_DN
0.000794791	6	41	CLDN5, TBX3, CYP2E1, THBD, CFD, LEPR	0.0328339	YAO_HOXA10_TARGETS_VIA_PROGESTERONE_UP
0.000798045	3	12	PTH2R, CNTNAP2, ZIC1	0.0328339	RICKMAN_HEAD_AND_NECK_CANCER_B
0.000798045	3	12	DSG2, HOXA10, ALDH1A2	0.0328339	YAO_HOXA10_TARGETS_VIA_PROGESTERONE_DN
0.000798045	3	12	HOXD8, NETO1, HOXD4	0.0328339	MIKKELSEN_ES_HCP_WITH_H3K27ME3
0.000798045	3	12	FBN2, TBX3, HOXD8	0.0328339	NIELSEN_SCHWANNOMA_DN
0.000835933	17	206	COX7A1, THBD, HOXA5, G0S2, SULT1A1, LEPR, SHE, CYP2E1, TBX3, VAX1, AHR, ADRB3, CFD, CLDN5, MYO1B, BNC1, HOXA6	0.0338553	SWEET_LUNG_CANCER_KRAS_DN
0.000853909	13	140	LEPR, DLK1, DES, HOXA5, RELN, HHEX, HOXA9, SYNM, SLIT3, OXTR, THBD, CYP1B1, CLDN5	0.0340512	SMID_BREAST_CANCER_NORMAL_LIKE_UP
0.000923202	6	42	HOXD13, EVX2, TNS3, HOXA2, TBX18, TMEM30B	0.0356676	DAWSON_METHYLATED_IN_LYMPHOMA_TCL1
0.000949485	4	21	TMEM176A, LTBP2, CYP1B1, TMEM176B	0.0356676	CHIARADONNA_NEOPLASTIC_TRANSFORMATION_KRAS_CDC25_DN
0.000949485	4	21	GCM2, HOXA6, BNC1, VAX1	0.0356676	RIZ_ERYTHROID_DIFFERENTIATION_6HR
0.000949485	4	21	TBX3, S100A13, C15orf48, TACSTD2	0.0356676	KOHOUTEK_CCNT1_TARGETS
0.000982344	13	142	GRHL2, RIPK4, TPBG, C1orf86, TMEM30B, PPAP2C, GIPC2, EPCAM, TACSTD2, AQP5, SPINT2, KRT19, FZD6	0.0363748	MCBRYAN_PUBERTAL_BREAST_4_5WK_UP
0.00111842	3	13	HOXA6, EVX2, HOXA4	0.0396833	RIZ_ERYTHROID_DIFFERENTIATION_APOBEC2
0.00111842	3	13	NPHS2, C4orf32, RASSF10	0.0396833	CUI_TCF21_TARGETS_DN
0.00111842	3	13	PAX8, LPAR3, HOXA10	0.0396833	MATZUK_IMPLANTATION_AND_UTERINE
0.00113293	5	32	PCDHGB6, DNAJB5, RUNDC3B, KCNA4, TRHDE	0.0396833	NOUZOVA_METHYLATED_IN_APL
0.00119093	4	22	HTATIP2, CYP1B1, TSPYL5, AHR	0.0411584	FRIDMAN_IMMORTALIZATION_DN
0.00134112	5	33	ZDBF2, LPAR3, CYP2E1, KIAA1377, ANGPTL5	0.0457394	ACEVEDO_LIVER_CANCER_WITH_H3K9ME3_UP
0.00146277	7	58	SPOCK1, RBM11, HOXA9, DHRS3, PPP1R14A, HOXA5, FLT3	0.0483931	TAKEDA_TARGETS_OF_NUP98_HOXA9_FUSION_8D_UP
0.00147494	4	23	TPM2, CFD, ARHGEF17, F2RL1	0.0483931	VALK_AML_CLUSTER_10
0.00147494	4	23	CLDN5, CFD, G0S2, C1orf115	0.0483931	NAKAYAMA_SOFT_TISSUE_TUMORS_PCA2_DN
0.00151925	3	14	TWIST1, PMAIP1, CMTM8	0.0492236	LU_TUMOR_VASCULATURE_UP
0.0015773	5	34	CTSZ, GALNT6, DLX2, SULT1A1, THBD	0.0504735	ENGELMANN_CANCER_PROGENITORS_UP
0.00163517	9	87	KRT19, SLC27A2, TMEM30B, LAMA3, TACSTD2, FOSL1, F2RL1, EPCAM, TPM2	0.0516872	WU_CELL_MIGRATION
0.00180585	4	24	HOXA5, EHHADH, CYP7B1, CYP2E1	0.0557233	LEE_LIVER_CANCER_DENA_DN
0.00180585	4	24	TOX2, G0S2, PTGER2, BGLAP	0.0557233	ZHAN_MULTIPLE_MYELOMA_CD1_UP
0.0018294	6	47	CFD, SLC27A2, TBX3, DSC3, FAM174B, LAMA3	0.0557859	SCHUETZ_BREAST_CANCER_DUCTAL_INVASIVE_DN
0.00186867	35	573	CNTN2, SPAG6, KAZALD1, GPR83, LTBR, EFCAB4B, SYT10, DLK1, GREM1, C15orf48, ALDH1A2, SULT1A1, NLGN2, MFSD6L, MPO, CACNG6, ZNF781, PPP1R14A, HOXD13, FBXO41, C20orf85, KCNG1, UPB1, CLDN5, FBLN2, RFX6, SERPINB9, WBSCR17, FLNC, RNF32, HOXA10, KLF14, ANK1, DMRT2, DNAJB5	0.0563208	ZWANG_TRANSIENTLY_UP_BY_2ND_EGF_PULSE_ONLY
0.0020102	3	15	G0S2, TMEM176A, EHHADH	0.05989	VARELA_ZMPSTE24_TARGETS_DN
0.00211724	11	121	FZD6, DHRS3, MPO, ARHGEF17, TACSTD2, F2RL1, PMAIP1, ERG, DLK1, CYP2E1, YPEL1	0.0623624	VERHAAK_AML_WITH_NPM1_MUTATED_DN
0.00214311	5	36	RBM47, SPINT2, LEPR, KL, CLDN1	0.062415	LEIN_CHOROID_PLEXUS_MARKERS
0.00218803	4	25	RELN, PAX3, CYP7B1, ADRB3	0.0630152	ICHIBA_GRAFT_VERSUS_HOST_DISEASE_35D_DN
0.00247765	5	37	HOXA4, HOXA9, HOXA5, DLX2, FLT3	0.0705721	TAKEDA_TARGETS_OF_NUP98_HOXA9_FUSION_6HR_UP
0.0026008	3	16	SERPINB1, THBD, MC1R	0.0711769	TAVOR_CEBPA_TARGETS_DN
0.0026008	3	16	KCNA4, KAZALD1, DHRS3	0.0711769	HARRIS_BRAIN_CANCER_PROGENITORS
0.00262592	4	26	SLC27A2, CYP2E1, G0S2, CYP7B1	0.0711769	LEE_LIVER_CANCER_MYC_E2F1_DN
0.00262592	4	26	MSC, TMEM30B, ZIC1, TWIST1	0.0711769	BROWNE_HCMV_INFECTION_8HR_DN
0.00263618	6	50	RBP7, DLX2, HOXD13, TSPYL5, SLC35F3, CLDN11	0.0711769	RICKMAN_HEAD_AND_NECK_CANCER_A
0.00270888	18	247	CYP1B1, SULT1A1, DIO3, DHRS3, TCF15, CYP7B1, RAB5C, ALOX12, CLDN23, ALDH1A2, HOXA10, HOXD8, BAI1, RNF32, EPCAM, KRT19, TACSTD2, HDAC9	0.0723858	SCHAEFFER_PROSTATE_DEVELOPMENT_48HR_UP
0.00284996	5	38	CFD, CLDN5, TACSTD2, TMEM30B, EPCAM	0.0753785	YAO_TEMPORAL_RESPONSE_TO_PROGESTERONE_CLUSTER_6
0.00305351	12	143	SYT10, TPM2, CLDN1, DES, G0S2, SPOCK1, HDAC9, LAMA3, CLDN23, SYNM, PPP1R14A, UPB1	0.0799466	ACEVEDO_FGFR1_TARGETS_IN_PROSTATE_CANCER_MODEL_DN
0.00316185	9	95	BNC1, KRT19, GREM1, DMRT2, KIAA1377, RUNDC3B, RBM47, ADAMTSL3, PIK3R5	0.081523	DURAND_STROMA_NS_UP
0.00317663	11	127	FAM174B, DNAI2, C1orf87, IQCA1, TTC12, CLDN23, SLC27A2, C20orf85, CR1, SPAG6, CCDC11	0.081523	SENGUPTA_NASOPHARYNGEAL_CARCINOMA_DN
0.00330034	3	17	RELN, ALOX12, PAX9	0.0830531	WANG_BARRETTS_ESOPHAGUS_AND_ESOPHAGUS_CANCER_DN
0.00330034	3	17	HOXA9, HOXA5, HOXA4	0.0830531	VALK_AML_WITH_FLT3_ITD
0.00368674	4	28	EPCAM, HTATIP2, SPINT2, SPOCK3	0.0918849	SAMOLS_TARGETS_OF_KHSV_MIRNAS_DN
0.00431861	4	29	QPCT, EHHADH, HTATIP2, GIPC2	0.106433	LEE_LIVER_CANCER_ACOX1_UP
0.0043526	12	149	ADRA1A, CR1, ARHGAP10, SERPINB1, SYK, TPM2, MSC, TMBIM1, QPCT, AHR, IRAK3, CYP1B1	0.106433	OISHI_CHOLANGIOMA_STEM_CELL_LIKE_DN
0.00446624	26	416	LTBP2, RYR2, TRPC6, MYO1B, LPAR3, RELN, TMEM176B, TMEM176A, ZDBF2, GREM1, TMBIM1, HOXA5, HOXA2, FBLN2, CYP1B1, HOXA10, CYP7B1, CTSZ, MCOLN2, S100A13, CMTM8, KAZALD1, FLT3, SERPINB1, TES, HOXA9	0.108191	WONG_ADULT_TISSUE_STEM_MODULE
0.00458534	9	100	FAM43A, S100A13, TMEM176B, LTBP2, F2RL1, SERPINB1, SYNM, AHR, TMEM176A	0.110048	GAUSSMANN_MLL_AF4_FUSION_TARGETS_F_UP
0.00476872	5	42	MYO1B, CYP7B1, HDAC9, PMAIP1, SLC5A7	0.112982	GAUSSMANN_MLL_AF4_FUSION_TARGETS_E_UP
0.00502405	4	30	C1orf115, FAM174B, SULT1A1, GALNT6	0.112982	DOANE_BREAST_CANCER_CLASSES_UP
0.00502405	4	30	F2RL1, CLDN1, FAM43A, FOSL1	0.112982	WIEDERSCHAIN_TARGETS_OF_BMI1_AND_PCGF2
0.00504158	6	56	KRT19, QPCT, C15orf48, GPR160, PMAIP1, GALNT6	0.112982	ANDERSEN_CHOLANGIOCARCINOMA_CLASS2
0.00506186	3	19	CFD, G0S2, MPO	0.112982	HADDAD_T_LYMPHOCYTE_AND_NK_PROGENITOR_DN
0.00506186	3	19	HOXA9, TNS3, HOXA10	0.112982	VALK_AML_CLUSTER_15
0.00506186	3	19	EPCAM, TES, CHKB	0.112982	ANDERSEN_LIVER_CANCER_KRT19_UP
0.005302	7	71	HOXA9, CFD, MCOLN2, AHR, C15orf48, LPAR3, HOXA5	0.112982	TAKEDA_TARGETS_OF_NUP98_HOXA9_FUSION_16D_UP
0.00536143	2	10	TMEM176B, F2RL1	0.112982	TONKS_TARGETS_OF_RUNX1_RUNX1T1_FUSION_SUSTAINED_IN_GRANULOCYTE_UP
0.00536143	2	10	GREM1, SPOCK1	0.112982	MAHADEVAN_IMATINIB_RESISTANCE_UP
0.00536143	2	10	MSX2, CTSZ	0.112982	VIETOR_IFRD1_TARGETS
0.00536143	2	10	EIF3L, SYK	0.112982	KYNG_ENVIRONMENTAL_STRESS_RESPONSE_NOT_BY_4NQO_IN_OLD
0.00536143	2	10	SPINT2, KRT19	0.112982	MISHRA_CARCINOMA_ASSOCIATED_FIBROBLAST_DN
0.00536143	2	10	GPR83, DLK1	0.112982	ONO_FOXP3_TARGETS_UP
0.00536143	2	10	GNAL, EIF3L	0.112982	KYNG_WERNER_SYNDROM_UP
0.00554294	13	171	HHEX, TSPYL5, CYYR1, ERG, HOXA9, FLT3, TNS3, DSG2, SLC27A2, SPOCK3, HOXA10, HOXA5, F2RL1	0.115865	JAATINEN_HEMATOPOIETIC_STEM_CELL_UP
0.00580743	4	31	FBXO41, CYP2E1, C4orf32, CFD	0.120423	CADWELL_ATG16L1_TARGETS_UP
0.00606268	8	88	RUNDC3B, RFX6, MCOLN2, CLDN23, NPY, SOX10, CNTN4, HOXD10	0.122437	SABATES_COLORECTAL_ADENOMA_DN
0.00606268	8	88	ACN9, CYP2E1, KIAA1377, LPAR3, ANGPTL5, ARHGAP10, DSC3, KL	0.122437	ACEVEDO_LIVER_CANCER_WITH_H3K27ME3_UP
0.00608336	16	228	FBLN2, C15orf48, ALOX12, SYNM, SVIL, TBX3, KCNG1, DHRS3, TNS3, BTBD2, SLIT3, RNF32, TSPYL5, TCF15, CTSZ, C10orf67	0.122437	KOYAMA_SEMA3B_TARGETS_DN
0.006128	6	58	TMEM176B, CYP1B1, TMEM176A, DLK1, LTBP2, TWIST1	0.122437	CHIARADONNA_NEOPLASTIC_TRANSFORMATION_CDC25_UP
0.00614073	3	20	AHR, SERPINB1, HHEX	0.122437	TARTE_PLASMA_CELL_VS_B_LYMPHOCYTE_DN
0.00673251	5	45	SERPINB1, KRT19, IL17RA, TACSTD2, EPCAM	0.131738	HUMMERICH_SKIN_CANCER_PROGRESSION_UP
0.00681018	7	74	ADAMTSL3, SATB2, PCDHGB6, LAMA3, CMTM2, MYF6, PPP1R14A	0.131738	ACEVEDO_LIVER_CANCER_WITH_H3K27ME3_DN
0.00716632	2	11	TMEM176B, TMEM176A	0.131738	BERENJENO_TRANSFORMED_BY_RHOA_FOREVER_UP
0.00716632	2	11	CYP1B1, LEPR	0.131738	ONDER_CDH1_TARGETS_3_UP
0.00716632	2	11	HOXA9, CFD	0.131738	GOLUB_ALL_VS_AML_DN
0.00716632	2	11	CYP7B1, EHHADH	0.131738	WENG_POR_TARGETS_GLOBAL_DN
0.00716632	2	11	DLK1, ALDH1A2	0.131738	NIELSEN_GIST_AND_SYNOVIAL_SARCOMA_UP
0.00716632	2	11	ADRB3, CFD	0.131738	LI_ADIPOGENESIS_BY_ACTIVATED_PPARG
0.00716632	2	11	BCL2L10, CYP7B1	0.131738	ALONSO_METASTASIS_DN
0.00716632	2	11	PMAIP1, TACSTD2	0.131738	DAZARD_UV_RESPONSE_CLUSTER_G28
0.00716632	2	11	TBX3, C1orf115	0.131738	KIM_LIVER_CANCER_POOR_SURVIVAL_DN
0.0073622	3	21	TMEM176B, ALDH1A2, ERG	0.133446	TONKS_TARGETS_OF_RUNX1_RUNX1T1_FUSION_SUSTAINDED_IN_ERYTHROCYTE_UP
0.0073622	3	21	TMEM176B, TMEM176A, SERPINB9	0.133446	MIKKELSEN_MEF_LCP_WITH_H3K4ME3
0.0079824	7	76	SERPINB1, NETO1, SATB2, HOXA10, C15orf48, FOSL1, MAB21L2	0.143683	IZADPANAH_STEM_CELL_ADIPOSE_VS_BONE_UP
0.00819005	11	143	CYP1B1, TWIST1, GREM1, LTBP2, SPOCK1, ITGBL1, PTGER2, SYNM, LEPR, SATB2, HOXA5	0.146404	ONDER_CDH1_TARGETS_2_UP
0.00873359	3	22	CNTNAP2, PMAIP1, SULT1A1	0.150483	BILBAN_B_CLL_LPL_DN
0.00873359	3	22	SPOCK1, SOX10, NLGN2	0.150483	COLIN_PILOCYTIC_ASTROCYTOMA_VS_GLIOBLASTOMA_UP
0.00873359	3	22	TMEM176B, TMEM176A, MPO	0.150483	ABBUD_LIF_SIGNALING_1_UP
0.00873359	3	22	LTBP2, GPR6, TACSTD2	0.150483	HENDRICKS_SMARCA4_TARGETS_DN
0.00873359	3	22	PAX3, THBD, POPDC3	0.150483	TSENG_ADIPOGENIC_POTENTIAL_DN
0.00922512	5	48	EVX2, TBX4, HOXD4, HOXD10, HOXA2	0.150483	MIKKELSEN_IPS_WITH_HCP_H3K27ME3
0.00928908	2	12	TWIST1, CYP1B1	0.150483	LI_CISPLATIN_RESISTANCE_UP
0.00928908	2	12	LEPR, ANK1	0.150483	SCHURINGA_STAT5A_TARGETS_UP
0.00928908	2	12	ERG, FLT3	0.150483	WANG_IMMORTALIZED_BY_HOXA9_AND_MEIS1_DN
0.00928908	2	12	OXTR, F2RL1	0.150483	WESTON_VEGFA_TARGETS_12HR
0.00928908	2	12	TXNRD1, FOSL1	0.150483	ZHENG_RESPONSE_TO_ARSENITE_UP
0.00928908	2	12	CLDN5, TTC12	0.150483	SMID_BREAST_CANCER_RELAPSE_IN_LUNG_DN
0.00928908	2	12	DES, KCNG1	0.150483	MEISSNER_BRAIN_HCP_WITH_H3_UNMETHYLATED
0.00928908	2	12	SDR16C5, RNF32	0.150483	PEDERSEN_METASTASIS_BY_ERBB2_ISOFORM_6
0.00928908	2	12	AQP5, TPM2	0.150483	DELACROIX_RAR_TARGETS_DN
0.00947442	9	111	TWIST1, SLIT3, TMEM176B, ITGBL1, LTBP2, CFD, SLC22A3, MSC, SPOCK1	0.152532	BOQUEST_STEM_CELL_UP
0.00980532	4	35	MYO1B, PIK3R5, SOX10, IQCA1	0.156885	ODONNELL_METASTASIS_UP
0.0101856	5	49	DHRS3, DLX6, SVIL, MSX2, GPR88	0.161969	KANG_IMMORTALIZED_BY_TERT_DN
0.0110412	4	36	FLT3, CLDN11, SLC27A2, DHRS3	0.173056	LABBE_WNT3A_TARGETS_DN
0.0110762	10	131	AQPEP, HTATIP2, TOX2, HOXA2, ITGBL1, HOXD13, GALNT6, PPP1R14A, LTBP2, LPAR3	0.173056	KOYAMA_SEMA3B_TARGETS_UP
0.0117403	2	13	CYP1B1, F2RL1	0.173056	JI_METASTASIS_REPRESSED_BY_STK11
0.0117403	2	13	SVIL, DHRS3	0.173056	KIM_GERMINAL_CENTER_T_HELPER_DN
0.0117403	2	13	HHEX, SYK	0.173056	ZHAN_MULTIPLE_MYELOMA_DN
0.0117403	2	13	RELN, RYR2	0.173056	VANASSE_BCL2_TARGETS_UP
0.0117403	2	13	IL17RA, GPR83	0.173056	ONO_AML1_TARGETS_DN
0.0117403	2	13	RELN, CYP2E1	0.173056	YAO_TEMPORAL_RESPONSE_TO_PROGESTERONE_CLUSTER_5
0.0119529	3	24	DES, COX7A1, OXTR	0.173056	WILCOX_RESPONSE_TO_PROGESTERONE_DN
0.0119529	3	24	LTBP2, GPR83, RELN	0.173056	WATTEL_AUTONOMOUS_THYROID_ADENOMA_DN
0.0119529	3	24	POPDC3, NEFL, HOXA9	0.173056	RICKMAN_HEAD_AND_NECK_CANCER_C
0.0119529	3	24	FOXE1, CLDN5, TES	0.173056	SATO_SILENCED_BY_METHYLATION_IN_PANCREATIC_CANCER_2
0.0119529	3	24	LRRC61, DHRS3, S100A13	0.173056	LIU_SMARCA4_TARGETS
0.0119529	3	24	G0S2, LAMA3, MYO1B	0.173056	CROMER_TUMORIGENESIS_UP
0.0119529	3	24	GREM1, SPOCK1, ITGBL1	0.173056	ANASTASSIOU_MULTICANCER_INVASIVENESS_SIGNATURE
0.0119529	3	24	ERG, HOXA5, FLT3	0.173056	EPPERT_CE_HSC_LSC
0.0120178	8	98	CYP1B1, TBX3, S100A13, UPB1, RFTN1, CNTNAP2, PMAIP1, RELN	0.173056	HELLER_SILENCED_BY_METHYLATION_UP
0.012316	5	51	MYO1B, BOK, EHHADH, CIDEB, RUNDC3B	0.174385	CHIANG_LIVER_CANCER_SUBCLASS_PROLIFERATION_DN
0.0123792	4	37	CFD, FLT3, ALDH1A2, ZNF578	0.174385	YORDY_RECIPROCAL_REGULATION_BY_ETS1_AND_SP100_DN
0.0123792	4	37	CIDEB, TMEM30B, CLDN1, CYP7B1	0.174385	OHGUCHI_LIVER_HNF4A_TARGETS_DN
0.0123792	4	37	G0S2, AHR, IRAK3, POPDC3	0.174385	GHANDHI_BYSTANDER_IRRADIATION_UP
0.0127073	9	116	THBD, SERPINB1, CYP1B1, DHRS3, SERPINB9, ZIC1, CYP7B1, FIGNL1, SVIL	0.178039	PLASARI_TGFB1_TARGETS_10HR_DN
0.0127929	8	99	HOXA5, ALDH1A2, DNAJB5, F2RL1, SERPINB9, AHR, ERG, TMEM176B	0.178275	TONKS_TARGETS_OF_RUNX1_RUNX1T1_FUSION_HSC_UP
0.0137921	20	329	RBM47, FAM174B, FAM83E, SLC27A2, KRT19, ITGBL1, CLDN5, ZNF329, CFD, KAZALD1, MSX2, GALNT6, HHEX, CNTNAP2, CYP2E1, TTC12, TBX3, SLIT3, TMEM30B, ESRRG	0.185644	SMID_BREAST_CANCER_BASAL_DN
0.0138129	3	25	FBXL21, POLE2, DBF4	0.185644	ODONNELL_TARGETS_OF_MYC_AND_TFRC_DN
0.0138129	3	25	ADRB3, CFD, DHRS3	0.185644	RUAN_RESPONSE_TO_TNF_TROGLITAZONE_DN
0.0138129	3	25	LTBP2, HDAC9, SERPINB1	0.185644	LIU_VAV3_PROSTATE_CARCINOGENESIS_UP
0.0138129	3	25	TES, DSC3, ITGBL1	0.185644	HOSHIDA_LIVER_CANCER_LATE_RECURRENCE_UP
0.013823	4	38	RBP7, ALDH1A2, COX7A1, TBX3	0.185644	WONG_ENDMETRIUM_CANCER_DN
0.013823	4	38	LPAR3, MCOLN2, TWIST1, FLNC	0.185644	MEISSNER_BRAIN_HCP_WITH_H3K4ME2_AND_H3K27ME3
0.0145278	2	14	TCF15, THBD	0.192123	PAL_PRMT5_TARGETS_DN
0.0145278	2	14	GALNT6, LEPR	0.192123	HUANG_FOXA2_TARGETS_DN
0.0145278	2	14	CFD, FZD6	0.192123	VALK_AML_CLUSTER_4
0.0146536	13	192	RIPK4, ZIC1, KCNG1, HOXA9, DSC3, SOX10, HOXA5, CLDN1, DLK1, CYP1B1, FBLN2, SYNM, LEPR	0.192803	SMID_BREAST_CANCER_LUMINAL_B_DN
0.0147416	5	53	SPOCK3, SCTR, RBP7, PMAIP1, RFTN1	0.192981	CERVERA_SDHB_TARGETS_1_UP
0.0154458	6	69	CNTNAP2, PMAIP1, ZIC1, DLK1, FBN2, FGF8	0.201183	LEE_NEURAL_CREST_STEM_CELL_DN
0.0158469	3	26	SYNM, IQCA1, CFD	0.203342	TURASHVILI_BREAST_DUCTAL_CARCINOMA_VS_LOBULAR_NORMAL_DN
0.0158469	3	26	NEFL, ANK1, FOSL1	0.203342	KERLEY_RESPONSE_TO_CISPLATIN_UP
0.0158469	3	26	HIST3H2A, THBD, MAL2	0.203342	OLSSON_E2F3_TARGETS_DN
0.0162313	7	86	HOXA10, HOXA9, HOXA4, HOXA6, HOXA2, TMBIM1, HOXA5	0.206234	ALCALAY_AML_BY_NPM1_LOCALIZATION_UP
0.0162313	7	86	PTGER2, KIAA1377, DHRS3, CLDN11, MAB21L2, SLIT3, F2RL1	0.206234	RIGGI_EWING_SARCOMA_PROGENITOR_DN
0.0170414	4	40	LEPR, SLC22A3, MARVELD2, SERPINB9	0.21547	CHIANG_LIVER_CANCER_SUBCLASS_UNANNOTATED_UP
0.017481	5	55	HDAC9, DLK1, LTBP2, FBN2, LEPR	0.216095	CERVERA_SDHB_TARGETS_2
0.0176572	2	15	FOSL1, G0S2	0.216095	KOBAYASHI_EGFR_SIGNALING_6HR_DN
0.0176572	2	15	DHRS3, CLDN11	0.216095	ZIRN_TRETINOIN_RESPONSE_WT1_UP
0.0176572	2	15	MST1R, IL17RA	0.216095	NUMATA_CSF3_SIGNALING_VIA_STAT3
0.0176572	2	15	HOXA9, TNS3	0.216095	VALK_AML_WITH_CEBPA
0.0176572	2	15	SOX10, CECR6	0.216095	CERIBELLI_PROMOTERS_INACTIVE_AND_BOUND_BY_NFY
0.0176745	14	216	TOX2, SULT1A1, CYYR1, CLDN1, C15orf48, HDAC9, G0S2, PPP1R14A, TBX3, FAM43A, TRHDE, RELN, SERPINB9, ADRB3	0.216095	RIGGI_EWING_SARCOMA_PROGENITOR_UP
0.0180595	3	27	TXNRD1, TNS3, DHRS3	0.217722	NAKAMURA_CANCER_MICROENVIRONMENT_DN
0.0180595	3	27	CFD, CYP2E1, ADRB3	0.217722	NADLER_OBESITY_DN
0.0180595	3	27	CNTN4, TNS3, C1orf115	0.217722	ZHAN_MULTIPLE_MYELOMA_CD1_DN
0.0182464	8	105	RYR2, CLDN5, RELN, ALDH1A2, ESRRG, HHEX, PAX8, SYNM	0.218957	DELYS_THYROID_CANCER_DN
0.0188223	4	41	SPINT2, DSG2, FOSL1, KRT19	0.224827	LABBE_TARGETS_OF_TGFB1_AND_WNT3A_DN
0.0189737	5	56	FBLN2, SERPINB9, GREM1, AHR, HHEX	0.225596	LABBE_WNT3A_TARGETS_UP
0.020455	3	28	CLDN11, C15orf48, FAM43A	0.239186	CORRE_MULTIPLE_MYELOMA_UP
0.020455	3	28	PMAIP1, CYP26C1, FAM19A4	0.239186	FIGUEROA_AML_METHYLATION_CLUSTER_2_UP
0.0207214	4	42	HOXA5, HOXA9, HOXA4, HOXA10	0.239186	ROSS_LEUKEMIA_WITH_MLL_FUSIONS
0.0208335	7	90	TES, LTBP2, TMBIM1, RBM47, THBD, CTSZ, S100A13	0.239186	VERHAAK_GLIOBLASTOMA_MESENCHYMAL
0.0211318	2	16	SERPINB9, KIAA1377	0.239186	GARGALOVIC_RESPONSE_TO_OXIDIZED_PHOSPHOLIPIDS_GREEN_DN
0.0211318	2	16	PPP1R14A, CYP1B1	0.239186	OSADA_ASCL1_TARGETS_DN
0.0211318	2	16	RBP7, G0S2	0.239186	YAMASHITA_METHYLATED_IN_PROSTATE_CANCER
0.0211318	2	16	CFD, F2RL1	0.239186	VALK_AML_WITH_EVI1
0.0211318	2	16	KCNA4, PTH2R	0.239186	MIKKELSEN_MEF_ICP_WITH_H3K4ME3_AND_H3K27ME3
0.0211318	2	16	COX7A1, EHHADH	0.239186	WANG_ADIPOGENIC_GENES_REPRESSED_BY_SIRT1
0.0211318	2	16	DMRT2, TCF15	0.239186	VANDESLUIS_COMMD1_TARGETS_GROUP_3_DN
0.0219616	6	74	UPB1, TMBIM1, THBD, CYP1B1, IRAK3, DHRS3	0.246427	SMIRNOV_CIRCULATING_ENDOTHELIOCYTES_IN_CANCER_UP
0.0219616	6	74	C15orf48, CFD, SULT1A1, CYP2E1, NKX2.4, ALOX12	0.246427	IWANAGA_CARCINOGENESIS_BY_KRAS_DN

## Sheet: S5e. CLL T1 specific
pvalue	nhyper	ntotal	genes	padj	pathway
2.02381e-06	15	383	C20orf85, EMX2, TMEM61, FAM50B, FOXD1, C9orf142, TACSTD2, ZNF835, OTOS, HTR1A, CD164L2, GPR6, C1orf65, GDF15, PIK3R5	0.00549668	MARTENS_TRETINOIN_RESPONSE_UP
3.63059e-05	13	378	PIK3R5, SMC1B, TACSTD2, LTB4R2, HIF3A, RHCG, ALOX12, PTGIS, SCIN, CBLC, GPR83, PRLHR, CD164L2	0.0493034	MEISSNER_NPC_HCP_WITH_H3_UNMETHYLATED
5.94261e-05	21	857	FGF9, RPRM, HTR1A, C4orf19, NXNL2, LTB4R2, AVPR1A, GHSR, UNC13B, PRLHR, DLX1, ALOX12, EMX2, PIK3R5, ARHGAP29, TACSTD2, FAM64A, GPR83, FOXD1, PTGIS, SCIN	0.0538004	MEISSNER_BRAIN_HCP_WITH_H3K4ME3_AND_H3K27ME3
0.000192154	9	239	ANK3, LAMA2, GDAP1L1, ZNF454, CYYR1, ZFP42, MLPH, GDF15, SPHKAP	0.0843654	MIKKELSEN_ES_ICP_WITH_H3K4ME3
0.000219756	3	29	ADD2, FAAH, P2RY6	0.0843654	GYORFFY_DOXORUBICIN_RESISTANCE
0.000228746	2	12	MLPH, TSPAN13	0.0843654	FARMER_BREAST_CANCER_CLUSTER_6
0.000300277	12	406	DPYD, CDK6, MYO1B, TSPAN13, DNAJC15, RPRM, ANK3, LEPR, GDF15, MLPH, LMCD1, TACSTD2	0.0843654	GOZGIT_ESR1_TARGETS_DN
0.000309571	4	57	DPYD, KCTD12, ARHGAP29, GNG12	0.0843654	HUANG_DASATINIB_RESISTANCE_UP
0.000335989	4	58	KCNK5, UNC13B, ADD2, MTNR1A	0.0843654	LABBE_TGFB1_TARGETS_UP
0.00036408	4	59	MLPH, TSPAN13, LMCD1, MYO1B	0.0843654	ONDER_CDH1_SIGNALING_VIA_CTNNB1
0.000372749	2	14	GPR83, CDK6	0.0843654	ONO_AML1_TARGETS_DN
0.000372749	2	14	COL24A1, PCDHB6	0.0843654	MIKKELSEN_ES_ICP_WITH_H3K27ME3
0.000657469	4	67	TMEM204, PAK7, LEPR, DNAJC15	0.1295	HOELZEL_NF1_TARGETS_DN
0.000680627	2	17	PAK7, GDAP1L1	0.1295	MEISSNER_BRAIN_ICP_WITH_H3K4ME3
0.000752579	4	69	FAM50B, FAAH, TACSTD2, GDF15	0.1295	KIM_RESPONSE_TO_TSA_AND_DECITABINE_UP
0.000803817	4	70	FAM64A, GDF15, ARHGAP29, KCTD12	0.1295	KAN_RESPONSE_TO_ARSENIC_TRIOXIDE
0.000810566	2	18	PRKAA2, ARHGAP29	0.1295	YANAGIHARA_ESX1_TARGETS
0.000933181	3	42	MYO1B, PIK3R5, PCDHB6	0.13201	ODONNELL_METASTASIS_UP
0.00095526	2	19	TACSTD2, RHCG	0.13201	BOSCO_EPITHELIAL_DIFFERENTIATION_MODULE
0.0010207	3	43	SMC1B, MLPH, ZPBP	0.13201	SHETH_LIVER_CANCER_VS_TXNIP_LOSS_PAM5
0.0010207	3	43	LAMA2, PDPN, LEPR	0.13201	YAO_HOXA10_TARGETS_VIA_PROGESTERONE_UP
0.00129138	2	21	RHCG, PDPN	0.154975	HUPER_BREAST_BASAL_VS_LUMINAL_UP
0.00131238	6	158	RIBC2, TMEM190, C20orf85, C15orf26, DNAH9, PACRG	0.154975	SENGUPTA_NASOPHARYNGEAL_CARCINOMA_DN
0.00148397	2	22	HTR1A, GPR6	0.167936	SCHLESINGER_H3K27ME3_IN_NORMAL_AND_METHYLATED_IN_CANCER
0.0015827	5	120	GNG12, FGF9, KCTD12, TACSTD2, ANK3	0.171945	LI_WILMS_TUMOR_VS_FETAL_KIDNEY_1_UP
0.00169367	2	23	EMX2, MLPH	0.176924	LEIN_ASTROCYTE_MARKERS
0.00192101	2	24	RPRM, GDF15	0.188077	PACHER_TARGETS_OF_IGF1_AND_IGF2_UP
0.00193893	3	51	MYO1B, KCTD12, LMCD1	0.188077	GAUSSMANN_MLL_AF4_FUSION_TARGETS_E_UP
0.00201229	18	891	PRKAA2, C4orf19, DNAH9, TMEM190, RHCG, KIF19, FGF9, GDF15, TACSTD2, RIBC2, SCIN, KIAA1377, MLPH, PACRG, C15orf26, C20orf85, TMEM61, UNC13B	0.188462	DODD_NASOPHARYNGEAL_CARCINOMA_UP
0.00208382	3	52	GDF15, MLPH, ARHGAP29	0.188656	SCHUETZ_BREAST_CANCER_DUCTAL_INVASIVE_DN
0.00243058	2	26	PDPN, MYO1B	0.206296	CROMER_TUMORIGENESIS_UP
0.00243058	2	26	CHRNB1, TACSTD2	0.206296	KOHOUTEK_CCNT1_TARGETS
0.00271378	2	27	GPR6, TACSTD2	0.206596	HENDRICKS_SMARCA4_TARGETS_DN
0.00271378	2	27	CDK6, PAK7	0.206596	GOBERT_CORE_OLIGODENDROCYTE_DIFFERENTIATION
0.00273839	3	56	CDK6, ANK3, ARHGAP29	0.206596	RODRIGUES_THYROID_CARCINOMA_DN
0.00273839	3	56	GABRB1, GPR6, CHRNB1	0.206596	HILLION_HMGA1_TARGETS
0.00331317	3	59	CDK6, MYO1B, DNAJC15	0.232547	DUTERTRE_ESTRADIOL_RESPONSE_6HR_DN
0.00333922	2	29	ARHGAP29, FGF9	0.232547	HALMOS_CEBPA_TARGETS_DN
0.00333922	2	29	NMNAT3, PDPN	0.232547	NOUSHMEHR_GBM_SILENCED_BY_METHYLATION
0.00360724	7	240	PTGIS, LEPR, TSPAN13, KCTD12, LAMA2, MYO1B, FGF9	0.232895	SWEET_LUNG_CANCER_KRAS_DN
0.00368229	2	30	FOXD1, GDF15	0.232895	SAGIV_CD24_TARGETS_DN
0.00368229	2	30	GDF15, FAM64A	0.232895	KRIEG_HYPOXIA_VIA_KDM3A
0.00402336	8	299	LMCD1, RPRM, COL24A1, ALOX12, HOXB13, TACSTD2, TSPAN13, GNG12	0.232895	SCHAEFFER_PROSTATE_DEVELOPMENT_48HR_UP
0.00404613	2	31	GDF15, MYO1B	0.232895	WANG_METHYLATED_IN_BREAST_CANCER
0.00444501	3	64	COL24A1, HOXB13, PAK7	0.232895	MIKKELSEN_IPS_ICP_WITH_H3K4ME3_AND_H327ME3
0.00450735	14	679	ANK3, MTNR1A, GHSR, MYO1B, HTR1A, GDF15, TACSTD2, CHRNE, FAAH, KCNK5, LEPR, CHRNB1, FOXD1, P2RY6	0.232895	YOSHIMURA_MAPK8_TARGETS_UP
0.00461944	4	104	PRKAA2, GABRB1, ALDH1L2, ADD2	0.232895	LIN_NPAS4_TARGETS_UP
0.00483846	7	252	CYYR1, PIK3R5, HOXB4, ZNF454, TMEM204, CIDEB, PRLHR	0.232895	HATADA_METHYLATED_IN_LUNG_CANCER_UP
0.00523593	3	67	PSMC3, TSPAN13, CBLC	0.232895	ROVERSI_GLIOMA_COPY_NUMBER_UP
0.00548418	6	204	MTNR1A, HOXB13, PRKAA2, PAK7, SCIN, KIF19	0.232895	ODONNELL_TFRC_TARGETS_UP
0.00571618	2	35	TULP1, FIGNL1	0.232895	RASHI_RESPONSE_TO_IONIZING_RADIATION_3
0.00571618	2	35	LEPR, LAMA2	0.232895	SMID_BREAST_CANCER_LUMINAL_A_UP
0.00571618	2	35	LAMA2, UNC5D	0.232895	GYORFFY_MITOXANTRONE_RESISTANCE
0.00618899	2	36	PTGIS, GDF15	0.232895	CORRE_MULTIPLE_MYELOMA_UP
0.00618899	2	36	CDK6, RPH3A	0.232895	ZHAN_MULTIPLE_MYELOMA_CD1_AND_CD2_DN
0.00668451	2	37	PIK3R5, MLPH	0.232895	XU_HGF_TARGETS_REPRESSED_BY_AKT1_DN
0.00668451	2	37	CDK6, CBLC	0.232895	RIZKI_TUMOR_INVASIVENESS_2D_DN
0.00708962	3	73	LEPR, FOXD1, ADD2	0.239583	YAUCH_HEDGEHOG_SIGNALING_PARACRINE_UP
0.00708962	3	73	MLPH, FAAH, TSPAN13	0.239583	LIM_MAMMARY_LUMINAL_MATURE_UP
0.007203	2	38	FGF9, KCTD12	0.239583	DAVICIONI_TARGETS_OF_PAX_FOXO1_FUSIONS_DN
0.00816056	3	76	LEPR, MTNR1A, FGF9	0.243201	SERVITJA_LIVER_HNF1A_TARGETS_UP
0.00838815	6	221	HIF3A, TACSTD2, HTR1A, RPRM, ALOX12, GDF15	0.243201	SATO_SILENCED_BY_METHYLATION_IN_PANCREATIC_CANCER_1
0.00859609	7	278	FAM64A, HOXB4, PDPN, HOXB13, FIGNL1, C15orf26, PAK7	0.243201	DELACROIX_RAR_BOUND_ES
0.0089305	3	78	PDPN, MYO1B, FIGNL1	0.243201	CHIARADONNA_NEOPLASTIC_TRANSFORMATION_KRAS_UP
0.00913346	8	340	HOXB4, DLX1, MTNR1A, NMNAT3, HIF3A, MLPH, SCIN, COL24A1	0.243201	ACEVEDO_METHYLATED_IN_LIVER_CANCER_DN
0.00933266	3	79	LMCD1, AVPR1A, COL24A1	0.246092	SCHAEFFER_PROSTATE_DEVELOPMENT_12HR_UP
0.0100172	5	175	LEPR, PACRG, LAMP3, KCTD12, LAMA2	0.246226	SMID_BREAST_CANCER_NORMAL_LIKE_UP
0.010172	3	81	C1orf65, MTNR1A, RPH3A	0.246226	MIKKELSEN_MEF_HCP_WITH_H3_UNMETHYLATED
0.0106095	3	82	GNG12, CDK6, LEPR	0.248408	YAGI_AML_SURVIVAL

## Sheet: S5f. CLL T1 and T2
pvalue	nhyper	ntotal	genes	padj	pathway
2.61687e-09	9	81	HORMAD2, PCDHB7, PCDHA4, LTB4R, ACRBP, PCDHB14, PCDHA1, PCDHA2, PCDHA5	7.10742e-06	MIKKELSEN_MEF_HCP_WITH_H3_UNMETHYLATED
3.37262e-05	5	68	DBX1, HPSE2, PCDHB7, PCDHA4, PCDHA2	0.0340337	MIKKELSEN_IPS_WITH_HCP_H3K27ME3
4.16956e-05	3	22	PCDHB14, PCDHA2, PCDHB7	0.0340337	MIKKELSEN_ES_HCP_WITH_H3K27ME3
5.01232e-05	3	23	HSPB2, DSEL, CRYAB	0.0340337	COWLING_MYCN_TARGETS
8.40168e-05	2	10	HOXA5, HOXA6	0.0456379	NIKOLSKY_BREAST_CANCER_7P15_AMPLICON
0.000147748	3	30	ALX1, FUT7, MME	0.0589787	KIM_BIPOLAR_DISORDER_OLIGODENDROCYTE_DENSITY_CORR_DN
0.000152007	2	12	CXCL2, HIST1H2AI	0.0589787	DAZARD_UV_RESPONSE_CLUSTER_G28
0.000196307	2	13	ALX1, CXCL2	0.0592411	NEWMAN_ERCC6_TARGETS_UP
0.000196307	2	13	CES1, DUSP22	0.0592411	CAVARD_LIVER_CANCER_MALIGNANT_VS_BENIGN
0.0002482	2	14	FUT7, FUT9	0.0674112	WAGNER_APO2_SENSITIVITY
0.000376836	2	16	SOX4, EPS8	0.0852906	TONKS_TARGETS_OF_RUNX1_RUNX1T1_FUSION_SUSTAINED_IN_MONOCYTE_UP
0.000376836	2	16	CYB5A, C1orf115	0.0852906	KIM_LIVER_CANCER_POOR_SURVIVAL_DN
0.000639282	2	19	SOX4, CES1	0.124021	SHIPP_DLBCL_CURED_VS_FATAL_UP
0.000639282	2	19	CES1, MACROD2	0.124021	CAMPS_COLON_CANCER_COPY_NUMBER_DN
0.000747155	2	20	HIST1H2AI, CXCL2	0.135285	DAZARD_UV_RESPONSE_CLUSTER_G2
0.000884781	4	82	CES1, AHR, SOX4, HOXA5	0.147181	TAKEDA_TARGETS_OF_NUP98_HOXA9_FUSION_16D_UP
0.000996102	2	22	SOX4, GNAS	0.147181	SHIN_B_CELL_LYMPHOMA_CLUSTER_8
0.000996102	2	22	CHGB, RAB37	0.147181	OSADA_ASCL1_TARGETS_UP
0.00105767	6	175	HOXA5, CXCL2, MME, CRYAB, CES1, HSPB2	0.147181	SMID_BREAST_CANCER_NORMAL_LIKE_UP
0.00109759	4	86	HOXA5, KLHL30, HOXA6, ALX1	0.147181	KATSANOU_ELAVL1_TARGETS_UP
0.001138	2	23	GNAS, HIST1H2BM	0.147181	GNATENKO_PLATELET_SIGNATURE
0.00129204	2	24	ACRBP, SPACA1	0.158971	WEBER_METHYLATED_HCP_IN_FIBROBLAST_DN
0.00134622	4	90	HOXA5, SOX4, HOXA6, AHR	0.158971	TAKEDA_TARGETS_OF_NUP98_HOXA9_FUSION_3D_UP
0.00163804	2	26	EPS8, MME	0.171112	JAEGER_METASTASIS_UP
0.00163804	2	26	OSBPL1A, SASH1	0.171112	VANHARANTA_UTERINE_FIBROID_WITH_7Q_DELETION_DN
0.00163804	2	26	TSPYL5, AHR	0.171112	FRIDMAN_IMMORTALIZATION_DN
0.00183071	2	27	CES1, C1orf115	0.178465	NAKAYAMA_SOFT_TISSUE_TUMORS_PCA2_DN
0.0020069	3	59	HIST1H4E, OSBPL1A, HIST1H2AI	0.178465	ACEVEDO_LIVER_CANCER_WITH_H3K9ME3_DN
0.00203697	2	28	GNAS, CRYAB	0.178465	JOHANSSON_BRAIN_CANCER_EARLY_VS_LATE_DN
0.00203697	2	28	DUSP22, B3GALNT1	0.178465	ZHAN_MULTIPLE_MYELOMA_CD2_UP
0.00203697	2	28	OSBPL1A, HIST1H2BF	0.178465	HOSHIDA_LIVER_CANCER_LATE_RECURRENCE_UP
0.00225712	2	29	SIX1, B3GALNT1	0.1813	TSENG_ADIPOGENIC_POTENTIAL_DN
0.00225712	2	29	PLSCR4, HOXA5	0.1813	EPPERT_CE_HSC_LSC
0.00226958	3	61	B3GALNT1, SIX1, SASH1	0.1813	GRADE_COLON_AND_RECTAL_CANCER_DN
0.0024915	2	30	PCDHGA1, MME	0.18797	WILCOX_RESPONSE_TO_PROGESTERONE_DN
0.0024915	2	30	DSEL, TPD52L1	0.18797	PAPASPYRIDONOS_UNSTABLE_ATEROSCLEROTIC_PLAQUE_DN
0.00300411	2	32	CXCL2, FUT9	0.188371	BROWNE_HCMV_INFECTION_1HR_UP
0.00302816	3	66	SPOCK3, CHGB, CES1	0.188371	ROESSLER_LIVER_CANCER_METASTASIS_UP
0.00338171	4	111	HOXA5, SOX4, AHR, EPS8	0.188371	TONKS_TARGETS_OF_RUNX1_RUNX1T1_FUSION_HSC_UP
0.00357708	2	34	CNKSR1, CYB5A	0.188371	JAZAG_TGFB1_SIGNALING_VIA_SMAD4_DN
0.00371727	8	340	CES1, HOXA5, HOXA6, PKD2L2, OR2L13, HTRA4, HORMAD2, NPFFR2	0.188371	ACEVEDO_METHYLATED_IN_LIVER_CANCER_DN
0.00421253	2	36	CXCL2, MYADM	0.188371	HESS_TARGETS_OF_HOXA9_AND_MEIS1_DN
0.00421253	2	36	B3GALNT1, LTB4R	0.188371	BOYLAN_MULTIPLE_MYELOMA_PCA1_UP
0.00438225	5	169	CXCL2, SASH1, PCDHB7, ALX1, MME	0.188371	WANG_MLL_TARGETS
0.0045543	2	37	GNAS, CXCL2	0.188371	ZHANG_PROLIFERATING_VS_QUIESCENT
0.0049124	2	38	HOXA5, SOX4	0.188371	GARGALOVIC_RESPONSE_TO_OXIDIZED_PHOSPHOLIPIDS_GREY_DN
0.00505927	4	122	PBX4, CRYAB, SPOCK3, TPD52L1	0.188371	AFFAR_YY1_TARGETS_UP
0.00528706	2	39	SOX4, KIF6	0.188371	DARWICHE_PAPILLOMA_PROGRESSION_RISK
0.00548208	5	177	SOX4, CES1, SIX1, CRYAB, HSPB2	0.188371	MIYAGAWA_TARGETS_OF_EWSR1_ETS_FUSIONS_UP
0.00567847	2	40	CXCL2, AHR	0.188371	GHANDHI_BYSTANDER_IRRADIATION_UP
0.00577239	3	79	GNAS, EPS8, SYT14	0.188371	HOELZEL_NF1_TARGETS_UP
0.00599865	8	366	MACROD2, DUSP22, DDX25, SOX4, HOXA5, B3GALNT1, GNAS, FBXO41	0.188371	LIAO_METASTASIS
0.00608684	2	41	CES1, HOXA5	0.188371	ROSS_AML_WITH_MLL_FUSIONS
0.00608684	2	41	TPD52L1, SOX4	0.188371	MASSARWEH_RESPONSE_TO_ESTRADIOL
0.00608684	2	41	ZDBF2, MME	0.188371	ACEVEDO_LIVER_CANCER_WITH_H3K9ME3_UP
0.00651235	2	42	C1orf115, CYB5A	0.188371	DOANE_BREAST_CANCER_CLASSES_UP
0.00651235	2	42	GNAS, PLSCR4	0.188371	BEGUM_TARGETS_OF_PAX3_FOXO1_FUSION_UP
0.0068685	3	83	HOXA5, CXCL2, HOXA6	0.188371	VERHAAK_AML_WITH_NPM1_MUTATED_UP
0.0068685	3	83	OSBPL1A, C3orf55, FUT9	0.188371	FIGUEROA_AML_METHYLATION_CLUSTER_6_UP
0.00695518	2	43	PCDHB14, SPOCK3	0.188371	SHETH_LIVER_CANCER_VS_TXNIP_LOSS_PAM5
0.00695518	2	43	SOX4, CRYAB	0.188371	GERHOLD_ADIPOGENESIS_DN
0.00695518	2	43	MME, CTNNA2	0.188371	BOYAULT_LIVER_CANCER_SUBCLASS_G6_UP
0.00703394	4	132	MME, CES1, CXCL2, CYB5A	0.188371	HOSHIDA_LIVER_CANCER_SUBCLASS_S3
0.00707433	6	246	LTB4R, HOXA6, FUT7, OSBPL1A, CES1, HOXA5	0.188371	MULLIGHAN_MLL_SIGNATURE_2_UP
0.0074155	2	44	HIST1H2BH, HIST1H2BF	0.190487	ROSS_AML_WITH_AML1_ETO_FUSION
0.0074155	2	44	SASH1, EPS8	0.190487	YAO_TEMPORAL_RESPONSE_TO_PROGESTERONE_CLUSTER_0
0.00777547	3	86	CES1, C1orf115, LDHAL6A	0.190487	LEE_LIVER_CANCER_SURVIVAL_UP
0.00789348	2	45	CXCL2, AHR	0.190487	THEILGAARD_NEUTROPHIL_AT_SKIN_WOUND_UP
0.00789348	2	45	HOXA5, CES1	0.190487	ROSS_LEUKEMIA_WITH_MLL_FUSIONS
0.00809447	3	87	HIST1H2BF, HIST1H2AI, HIST1H4E	0.19117	ACEVEDO_LIVER_CANCER_WITH_H3K27ME3_DN
0.0083622	9	456	ZDBF2, OSBPL1A, HOXA5, TPD52L1, CXCL2, SASH1, EPS8, SOX4, MYADM	0.195791	WONG_ADULT_TISSUE_STEM_MODULE
0.00910276	3	90	SOX4, MYADM, DDX25	0.201001	SHETH_LIVER_CANCER_VS_TXNIP_LOSS_PAM2
0.0094348	2	48	CYB5A, MACROD2	0.206653	OUILLETTE_CLL_13Q14_DELETION_UP
0.00981858	3	92	CYB5A, GNAS, ENOSF1	0.213338	RODWELL_AGING_KIDNEY_NO_BLOOD_DN
0.0101898	3	93	EPS8, CXCL2, AHR	0.213819	SMITH_TERT_TARGETS_UP
0.0123692	2	53	CXCL2, PUS3	0.23157	AMIT_EGF_RESPONSE_120_HELA
0.0130119	2	54	FUT7, MME	0.23157	FERRANDO_T_ALL_WITH_MLL_ENL_FUSION_UP
0.0130119	2	54	CXCL2, CES1	0.23157	LENAOUR_DENDRITIC_CELL_MATURATION_DN
0.0130119	2	54	CXCL2, SLC6A11	0.23157	HILLION_HMGA1B_TARGETS
0.013045	3	100	CRYAB, HSPB2, TPD52L1	0.23157	EBAUER_TARGETS_OF_PAX3_FOXO1_FUSION_UP
0.0143538	2	56	SLC6A11, CXCL2	0.240647	HILLION_HMGA1_TARGETS
0.0150531	2	57	TSPYL5, CRYAB	0.240924	FRIDMAN_SENESCENCE_UP
0.0151017	8	425	HOXA6, GPR62, EXOC3L2, SPACA1, SOX4, MACROD2, RAB37, MIPOL1	0.240924	IVANOVA_HEMATOPOIESIS_STEM_CELL_AND_PROGENITOR
0.0157714	2	58	SOX4, HIST1H2BF	0.244773	KOBAYASHI_EGFR_SIGNALING_24HR_UP
0.0163667	3	107	ENOSF1, SPOCK3, CRYAB	0.246493	ASTON_MAJOR_DEPRESSIVE_DISORDER_DN
0.0164727	4	163	HOXA5, HOXA6, CHGB, ALX1	0.246493	MULLIGHAN_NPM1_MUTATED_SIGNATURE_1_UP
0.0165088	2	59	CRYAB, CT62	0.246493	FERREIRA_EWINGS_SARCOMA_UNSTABLE_VS_STABLE_DN
0.0165088	2	59	CXCL2, CYB5A	0.246493	DAZARD_RESPONSE_TO_UV_SCC_UP
0.016688	5	225	GNAS, SIX1, ALX1, DBX1, HOXA5	0.246493	MEISSNER_BRAIN_HCP_WITH_H3K27ME3
0.0168806	3	108	CYB5A, ACN9, SOX4	0.246493	OKUMURA_INFLAMMATORY_RESPONSE_LPS

## Sheet: S5g. CLL T2 specific
pvalue	nhyper	ntotal	genes	padj	pathway
1.177e-05	2	14	CXADR, G0S2	0.0319673	KANNAN_TP53_TARGETS_DN
7.25486e-05	2	25	CYP7B1, G0S2	0.0696913	LEE_LIVER_CANCER_MYC_TGFA_DN
7.83871e-05	3	70	G0S2, DCBLD2, FEZ1	0.0696913	AZARE_NEOPLASTIC_TRANSFORMATION_BY_STAT3_UP
0.000102638	2	28	G0S2, CYP7B1	0.0696913	LEE_LIVER_CANCER_MYC_E2F1_DN
0.000434424	3	109	CXADR, DCBLD2, WNT5A	0.100178	WU_CELL_MIGRATION
0.00048674	2	47	HOXA2, FOXG1	0.100178	DAWSON_METHYLATED_IN_LYMPHOMA_TCL1
0.000946179	3	134	CXADR, CHRNA7, WNT5A	0.100178	KYNG_DNA_DAMAGE_UP
0.00108464	3	139	FEZ1, DKK2, WNT5A	0.100178	BOQUEST_STEM_CELL_UP
0.00109761	2	62	LRIG3, GPHN	0.100178	BOYLAN_MULTIPLE_MYELOMA_D_UP
0.0011499	2	63	FEZ1, PCDP1	0.100178	CERVERA_SDHB_TARGETS_1_UP
0.0011499	2	63	WNT5A, G0S2	0.100178	ZHANG_TARGETS_OF_EWSR1_FLI1_FUSION
0.00120375	2	64	CHMP4C, CYP7B1	0.100178	FIGUEROA_AML_METHYLATION_CLUSTER_4_UP
0.00143498	2	68	GRIA4, WNT5A	0.100178	KONDO_PROSTATE_CANCER_HCP_WITH_H3K27ME3
0.00143849	3	150	DKK2, ADAMTS17, G0S2	0.100178	SENESE_HDAC1_AND_HDAC2_TARGETS_UP
0.00159623	4	263	CXADR, TAGLN3, G0S2, FEZ1	0.102532	ONDER_CDH1_TARGETS_2_DN
0.00176098	2	73	GPHN, SH2D4B	0.102532	YAUCH_HEDGEHOG_SIGNALING_PARACRINE_UP
0.00190329	2	75	CWF19L1, PPP2R3C	0.102532	NOUZOVA_TRETINOIN_AND_H4_ACETYLATION
0.00228994	2	80	DCBLD2, CXADR	0.106924	FOSTER_TOLERANT_MACROPHAGE_UP
0.00263199	2	84	HOXA2, TAGLN3	0.108471	LEE_NEURAL_CREST_STEM_CELL_UP
0.0026359	3	177	LRIG3, G0S2, TAGLN3	0.108471	MIYAGAWA_TARGETS_OF_EWSR1_ETS_FUSIONS_UP
0.00300411	2	88	SPATA6, FOXG1	0.116559	MARTORIATI_MDM4_TARGETS_NEUROEPITHELIUM_DN
0.00300411	2	88	SPATA6, HOXA2	0.116559	ALCALAY_AML_BY_NPM1_LOCALIZATION_UP
0.0034249	5	456	WNT5A, HOXA2, TAGLN3, CYP7B1, NCKAP1	0.120599	WONG_ADULT_TISSUE_STEM_MODULE
0.00493994	2	105	TAGLN3, FOXG1	0.145091	LU_AGING_BRAIN_DN
0.00493994	2	105	DOK3, HOXA2	0.145091	PEDRIOLI_MIR31_TARGETS_UP
0.00548282	2	109	DCBLD2, DOK3	0.151952	VERHAAK_GLIOBLASTOMA_MESENCHYMAL
0.00639077	4	363	FEZ1, TAGLN3, G0S2, DCBLD2	0.160392	CHICAS_RB1_TARGETS_SENESCENT
0.00667317	2	117	G0S2, SPATA6	0.160392	GAL_LEUKEMIC_STEM_CELL_DN
0.00667317	2	117	G0S2, WNT5A	0.160392	MCBRYAN_PUBERTAL_TGFB1_TARGETS_UP
0.00667317	2	117	CXADR, GAS2L3	0.160392	PYEON_CANCER_HEAD_AND_NECK_VS_CERVICAL_UP
0.00836291	2	127	WNT5A, DCBLD2	0.177484	WAMUNYOKOLI_OVARIAN_CANCER_LMP_DN
0.00858281	3	247	WNT5A, DKK2, SPATA6	0.177484	BOQUEST_STEM_CELL_CULTURED_VS_FRESH_UP
0.00891462	2	130	CXADR, WNT5A	0.177484	JAEGER_METASTASIS_DN
0.0100812	2	136	CYP7B1, DKK2	0.177484	AFFAR_YY1_TARGETS_DN
0.0136122	2	152	PPP2R3C, G0S2	0.177484	MIKKELSEN_NPC_ICP_WITH_H3K4ME3
0.0143434	2	155	PPP2R3C, KIAA0391	0.177484	LOCKWOOD_AMPLIFIED_IN_LUNG_CANCER
0.0161358	2	162	HOXA2, DCBLD2	0.177484	KOYAMA_SEMA3B_TARGETS_UP
0.0164017	2	163	HOXA2, WNT5A	0.177484	MULLIGHAN_NPM1_MUTATED_SIGNATURE_1_UP
0.0166701	2	164	CXADR, DCBLD2	0.177484	ACEVEDO_FGFR1_TARGETS_IN_PROSTATE_CANCER_MODEL_UP
0.0172144	2	166	NCKAP1, WNT5A	0.177484	HUTTMANN_B_CLL_POOR_SURVIVAL_UP
0.0172545	5	641	PPP2R3C, CXADR, FEZ1, LRIG3, KIAA0391	0.177484	BENPORATH_NANOG_TARGETS
0.0177541	4	467	PPP2R3C, DCBLD2, GAS2L3, WDR17	0.177484	RODRIGUES_THYROID_CARCINOMA_ANAPLASTIC_UP
0.0180495	2	169	G0S2, LRIG3	0.177484	WANG_MLL_TARGETS
0.0191979	2	173	DCBLD2, G0S2	0.177484	KOBAYASHI_EGFR_SIGNALING_24HR_DN
0.0194912	2	174	LRIG3, G0S2	0.177484	BILD_HRAS_ONCOGENIC_SIGNATURE
0.0209955	2	179	TMSB4Y, PABPC3	0.177484	GRADE_COLON_AND_RECTAL_CANCER_UP
0.0216147	2	181	G0S2, WNT5A	0.177484	BROWNE_HCMV_INFECTION_14HR_DN
0.0224901	3	329	DCBLD2, CXADR, GPHN	0.177484	SENESE_HDAC3_TARGETS_UP
0.0238613	2	188	CXADR, FEZ1	0.177484	TARTE_PLASMA_CELL_VS_PLASMABLAST_UP
0.0259874	3	344	FEZ1, WNT5A, DKK2	0.177484	BONOME_OVARIAN_CANCER_SURVIVAL_SUBOPTIMAL_DEBULKING
0.0265796	2	196	TMSB4Y, CXADR	0.177484	MUELLER_PLURINET
0.0272229	3	349	FEZ1, CXADR, WNT5A	0.177484	ENK_UV_RESPONSE_KERATINOCYTE_DN
0.0287239	2	202	HOXA2, WNT5A	0.177484	COLINA_TARGETS_OF_4EBP1_AND_4EBP2
0.02909	2	203	WNT5A, G0S2	0.177484	ZHOU_INFLAMMATORY_RESPONSE_LPS_UP
0.0305798	2	207	WNT5A, HOXA2	0.177484	MULLIGHAN_NPM1_SIGNATURE_3_UP
0.0311389	5	733	DCBLD2, CXADR, DKK2, CHMP4C, LRIG3	0.177484	BRUINS_UVC_RESPONSE_LATE
0.0361086	2	221	G0S2, FOXG1	0.177484	HAN_SATB1_TARGETS_UP
0.0369479	4	566	FEZ1, SPATA6, CWF19L1, GRIA4	0.177484	LASTOWSKA_NEUROBLASTOMA_COPY_NUMBER_DN
0.0380804	3	388	CXADR, WNT5A, G0S2	0.177484	FEVR_CTNNB1_TARGETS_UP
0.0390554	2	228	CXADR, WNT5A	0.177484	CHEMNITZ_RESPONSE_TO_PROSTAGLANDIN_E2_DN
0.0399196	2	230	CYP7B1, SPATA6	0.177484	KUMAR_TARGETS_OF_MLL_AF9_FUSION
0.0416773	2	234	PABPC3, DCBLD2	0.177484	BLALOCK_ALZHEIMERS_DISEASE_INCIPIENT_UP
0.0421229	2	235	CXADR, GAS2L3	0.177484	BASAKI_YBX1_TARGETS_DN
0.0430213	2	237	GPHN, NCKAP1	0.177484	YOSHIMURA_MAPK8_TARGETS_DN
0.0431646	5	792	FEZ1, HOXA2, DKK2, FOXG1, HIST1H3D	0.177484	BENPORATH_EED_TARGETS
0.0439294	2	239	PPP2R3C, G0S2	0.177484	MIKKELSEN_ES_ICP_WITH_H3K4ME3
0.0448473	2	241	G0S2, CXADR	0.177484	PHONG_TNF_RESPONSE_NOT_VIA_P38
0.0486152	2	249	GAS2L3, DKK2	0.177484	SCHAEFFER_PROSTATE_DEVELOPMENT_48HR_DN
0.049097	2	250	SPATA6, PCDP1	0.177484	CREIGHTON_ENDOCRINE_THERAPY_RESISTANCE_2
0.0504161	3	425	WNT5A, DCBLD2, DKK2	0.177484	DOUGLAS_BMI1_TARGETS_UP
0.051048	2	254	G0S2, DKK2	0.177484	RIGGI_EWING_SARCOMA_PROGENITOR_UP
0.0550635	2	262	G0S2, WNT5A	0.177484	ZHOU_INFLAMMATORY_RESPONSE_LIVE_UP
0.0550635	2	262	CYP7B1, GPHN	0.177484	PURBEY_TARGETS_OF_CTBP1_NOT_SATB1_DN
0.0554354	5	842	DKK2, ADAMTS17, FOXG1, HOXA2, FEZ1	0.177484	BENPORATH_ES_WITH_H3K27ME3
0.0560908	2	264	WNT5A, CXADR	0.177484	HAN_SATB1_TARGETS_DN
0.0571275	2	266	FOXG1, HIST1H3D	0.177484	HELLER_HDAC_TARGETS_SILENCED_BY_METHYLATION_UP
0.0575816	5	850	LRIG3, TAGLN3, DOK3, HOXA2, LRRC24	0.177484	ZWANG_TRANSIENTLY_UP_BY_1ST_EGF_PULSE_ONLY
0.0646413	2	280	CXADR, DCBLD2	0.177484	PILON_KLF1_TARGETS_UP
0.065195	2	281	ZNF215, TMSB4Y	0.177484	MITSIADES_RESPONSE_TO_APLIDIN_UP
0.0664101	3	466	G0S2, WNT5A, SH2D4B	0.177484	BRUINS_UVC_RESPONSE_VIA_TP53_GROUP_A
0.0679972	2	286	G0S2, WNT5A	0.177484	ZHOU_INFLAMMATORY_RESPONSE_FIMA_UP
0.0679972	2	286	CYP7B1, GAS2L3	0.177484	CUI_TCF21_TARGETS_2_UP
0.0708547	2	291	G0S2, CXADR	0.177484	SENESE_HDAC1_TARGETS_UP
0.0719857	3	479	GAS2L3, LRIG3, DCBLD2	0.177484	MILI_PSEUDOPODIA_HAPTOTAXIS_DN
0.0725956	2	294	FEZ1, DCBLD2	0.177484	REN_ALVEOLAR_RHABDOMYOSARCOMA_DN
0.0737495	3	483	FEZ1, KIAA0391, PPP2R3C	0.177574	BENPORATH_SOX2_TARGETS
0.0761357	2	300	G0S2, CXADR	0.178376	BAELDE_DIABETIC_NEPHROPATHY_DN
0.0815898	2	309	FEZ1, DCBLD2	0.179456	LIM_MAMMARY_STEM_CELL_UP
0.0838498	3	505	FEZ1, DKK2, FOXG1	0.181463	BENPORATH_PRC2_TARGETS
0.0859486	2	316	FEZ1, KIAA0391	0.182036	CREIGHTON_ENDOCRINE_THERAPY_RESISTANCE_1
0.0865795	2	317	CYP7B1, G0S2	0.182675	WEST_ADRENOCORTICAL_TUMOR_DN
0.0872124	2	318	PPP2R3C, FOXG1	0.182675	SHEDDEN_LUNG_CANCER_POOR_SURVIVAL_A6
0.0904074	2	323	LRIG3, FEZ1	0.182675	RODRIGUES_THYROID_CARCINOMA_ANAPLASTIC_DN
0.0910524	2	324	DOK3, CXADR	0.182675	IVANOVA_HEMATOPOIESIS_LATE_PROGENITOR
0.0923483	2	326	DCBLD2, G0S2	0.183213	CHARAFE_BREAST_CANCER_LUMINAL_VS_MESENCHYMAL_DN
0.0931074	3	524	FOXG1, FEZ1, NCKAP1	0.18456	KIM_ALL_DISORDERS_OLIGODENDROCYTE_NUMBER_CORR_UP
0.0938977	4	739	GPHN, LRIG3, NCKAP1, TAGLN3	0.18456	GRYDER_PAX3FOXO1_ENHANCERS_IN_TADS
0.0956226	2	331	GPHN, TAGLN3	0.184728	IVANOVA_HEMATOPOIESIS_EARLY_PROGENITOR
0.100288	2	338	GPHN, LRIG3	0.186122	GRYDER_PAX3FOXO1_ENHANCERS_KO_DOWN
0.101638	2	340	CWF19L1, WNT5A	0.187025	MARTORIATI_MDM4_TARGETS_FETAL_LIVER_DN
0.102316	2	341	CHMP4C, GAS2L3	0.188145	SENESE_HDAC3_TARGETS_DN
0.109197	2	351	GPHN, G0S2	0.190339	PARENT_MTOR_SIGNALING_UP
0.109197	2	351	CWF19L1, WDR17	0.190339	STARK_PREFRONTAL_CORTEX_22Q11_DELETION_DN
0.110865	3	558	FOXG1, CYP7B1, HOXA2	0.191202	BYSTRYKH_HEMATOPOIESIS_STEM_CELL_QTL_TRANS
0.114832	2	359	DKK2, WNT5A	0.192013	MARTINEZ_TP53_TARGETS_DN
0.114832	2	359	DKK2, WNT5A	0.192013	MARTINEZ_RB1_AND_TP53_TARGETS_DN
0.127915	2	377	GRIA4, CXADR	0.202104	SCHAEFFER_PROSTATE_DEVELOPMENT_6HR_DN
0.130147	2	380	NCKAP1, FOXG1	0.203344	KIM_ALL_DISORDERS_CALB1_CORR_UP
0.132394	2	383	NCKAP1, CXADR	0.20515	NAKAMURA_TUMOR_ZONE_PERIPHERAL_VS_CENTRAL_DN
0.135386	3	601	GAS2L3, DCBLD2, ZNF215	0.206896	GEORGES_TARGETS_OF_MIR192_AND_MIR215
0.147519	3	621	HIST1H3D, SPATA6, NCKAP1	0.215842	MARSON_BOUND_BY_FOXP3_STIMULATED
0.150866	2	407	FEZ1, HIST1H3D	0.216915	GRAESSMANN_RESPONSE_TO_MC_AND_DOXORUBICIN_UP
0.15817	3	638	HIST1H3D, CWF19L1, GAS2L3	0.223584	FISCHER_DREAM_TARGETS
0.16825	4	891	PCDP1, SPATA6, ANKMY1, WDR17	0.231963	DODD_NASOPHARYNGEAL_CARCINOMA_UP
0.168511	2	429	G0S2, DCBLD2	0.232204	WAKABAYASHI_ADIPOGENESIS_PPARG_BOUND_8D
0.169328	2	430	ZNF215, G0S2	0.232772	NUYTTEN_NIPP1_TARGETS_UP
0.180891	2	444	PPP2R3C, GAS2L3	0.241399	RODRIGUES_THYROID_CARCINOMA_POORLY_DIFFERENTIATED_UP
